# Supplementary material for: Mechanism of Thimerosal-Induced Structural Destabilization of a Recombinant Rotavirus P[4] Protein Antigen Formulated as a Multi-Dose Vaccine
Source: PubMed Central journal article supplement (PMC7884053; doi:10.1016/j.xphs.2020.11.033), 2021-03

## HX-MS Supplemental Information

### Mechanism of thimerosal-induced structural destabilization of a recombinant rotavirus

#### P[4] protein antigen formulated as a multi-dose vaccine

Kawaljit Kaur <sup>a,g</sup>, Jian Xiong <sup>a,f,g</sup>, Nishant Sawant <sup>a</sup>, Sanjeev Agarwal <sup>a,e</sup>, John M. Hickey <sup>a</sup>,  
David A. Holland <sup>a</sup>, Tarit K. Mukhopadhyay <sup>b,f</sup>, Joseph R. Brady <sup>c</sup>, Neil C. Dalvie <sup>c</sup>,  
Mary Kate Tracey <sup>c</sup>, Kerry R. Love <sup>c</sup>, J. Christopher Love <sup>c</sup>, David D. Weis <sup>d</sup>,  
Sangeeta B. Joshi <sup>a</sup>, and David B. Volkin <sup>a,\*</sup>

<sup>a</sup> Department of Pharmaceutical Chemistry, Vaccine Analytics and Formulation Center,  
University of Kansas, 2030 Becker Drive, Lawrence, KS 66047

<sup>b</sup> Department of Biochemical Engineering, University College London, Bernard Katz Building,  
Gower Street, London WC1E 6BT, UK

<sup>c</sup> Department of Chemical Engineering, Koch Institute for Integrative Cancer Research,  
Massachusetts Institute of Technology, Cambridge, MA 02139

<sup>d</sup> Department of Chemistry and R.N. Adams Institute of Bioanalytical Chemistry,  
University of Kansas, Lawrence, KS 66045

\*Corresponding author.

*E-mail address:* [volkin@ku.edu](mailto:volkin@ku.edu) (D.B. Volkin).

<sup>e</sup> Current addresses: Amgen, Thousand Oaks, California 91320.

<sup>f</sup> Current addresses: Merck & Co., West Point, Pennsylvania 19486.

<sup>g</sup> These authors contributed equally to this work.

**HX-MS experimental details, % deuterium uptake values and curves for the three NRRV P[4] protein samples used in the study: *E. coli* P[4], *Pp* P[4] (or P[4]-WT, wild type), and *Pp* P[4]-C173S (or P[4]-Cys M, cysteine mutant)**

| Data Set                                         | <i>E. coli</i> P[4]                                        | P[4]-WT                                                    | P[4]-Cys M                                                 |
|--------------------------------------------------|------------------------------------------------------------|------------------------------------------------------------|------------------------------------------------------------|
| HDX reaction details                             | 10 mM phosphate buffer, pD <sub>read</sub> = 6.8,<br>20 °C | 10 mM phosphate buffer, pD <sub>read</sub> = 6.8,<br>20 °C | 10 mM phosphate buffer, pD <sub>read</sub> = 6.8,<br>20 °C |
| HDX time course (S)                              | 20, 100, 500, 2500, 12500, 62500                           | 20, 100, 500, 2500, 12500, 62500                           | 20, 100, 500, 2500, 12500, 62500                           |
| HDX full D control samples                       | N/A                                                        | N/A                                                        | N/A                                                        |
| Back-exchange (mean / IQR)                       | N/A                                                        | N/A                                                        | N/A                                                        |
| # of Peptides                                    | 67                                                         | 72                                                         | 82                                                         |
| Sequence coverage overall                        | 100%                                                       | 100%                                                       | 100%                                                       |
| Average peptide length                           | 14.8                                                       | 15.1                                                       | 15.6                                                       |
| Replicates (biological or technical)             | 3 (technical)                                              | 3 (technical)                                              | 3 (technical)                                              |
| Repeatability                                    | 0.088 (average standard deviation)                         | 0.074 (average standard deviation)                         | 0.100 (average standard deviation)                         |
| Significant differences in HDX (delta HDX > X D) | depend on individual peptide                               | depend on individual peptide                               | depend on individual peptide                               |

| State             | Start | End | Sequence                        | Search RT | Charge | Max D | 20s #D | 20s #D | 20s #D | 100s #D | 100s #D | 100s #D | 500s #D | 500s #D | 500s #D | 2500s #D | 2500s #D | 2500s #D | 12500s #D | 12500s #D | 12500s #D | 62500s #D | 62500s #D | 62500s #D |
|-------------------|-------|-----|---------------------------------|-----------|--------|-------|--------|--------|--------|---------|---------|---------|---------|---------|---------|----------|----------|----------|-----------|-----------|-----------|-----------|-----------|-----------|
| E.cali P[4] alone | 1     | 3   | MGY                             | 4.26      | 1      | 1     | 0.965  | 1.076  | 1.045  | 1.043   | 1.01    | 1.101   | 1.072   | 1.071   | 1.075   | 1.048    | 1.027    | 1.018    | 1.043     | 1.119     | 1.044     | 1.054     | 1.048     | 1.048     |
| E.cali P[4] alone | 1     | 6   | MQYKA                           | 4.99      | 2      | 4     | 3.04   | 3.099  | 3.205  | 3.247   | 3.18    | 3.216   | 3.244   | 3.192   | 3.203   | 3.222    | 3.272    | 3.242    | 3.287     | 3.284     | 3.266     | 3.325     | 3.269     | 3.304     |
| E.cali P[4] alone | 1     | 10  | MQYKANSKF                       | 5.88      | 3      | 8     | 5.713  | 5.804  | 5.984  | 5.901   | 5.884   | 5.989   | 5.895   | 5.891   | 5.888   | 5.909    | 6.024    | 5.946    | 6.017     | 6.055     | 5.975     | 6.072     | 5.993     | 6.06      |
| E.cali P[4] alone | 1     | 12  | MQYKANSKFFG                     | 6.41      | 3      | 10    | 7.249  | 7.341  | 7.472  | 7.421   | 7.414   | 7.519   | 7.441   | 7.425   | 7.39    | 7.447    | 7.575    | 7.503    | 7.595     | 7.613     | 7.525     | 7.633     | 7.597     | 7.646     |
| E.cali P[4] alone | 3     | 10  | YIKANSKF                        | 4.36      | 3      | 6     | 4.194  | 4.07   | 4.323  | 4.526   | 4.311   | 4.506   | 4.424   | 4.489   | 4.411   | 4.392    | 4.518    | 4.453    | 4.481     | 4.531     | 4.457     | 4.601     | 4.447     | 4.592     |
| E.cali P[4] alone | 11    | 15  | IGITE                           | 4.47      | 1      | 3     | 2.749  | 2.782  | 2.864  | 2.855   | 2.85    | 2.897   | 2.884   | 2.842   | 2.837   | 2.883    | 2.934    | 2.886    | 2.943     | 2.934     | 2.955     | 2.949     | 2.921     | 2.962     |
| E.cali P[4] alone | 11    | 23  | IGITELGSSGSLV                   | 8.57      | 2      | 11    | 8.337  | 8.2    | 8.492  | 8.348   | 8.36    | 8.351   | 8.392   | 8.376   | 8.266   | 8.332    | 8.552    | 8.469    | 8.542     | 8.599     | 8.491     | 8.628     | 8.585     | 8.586     |
| E.cali P[4] alone | 11    | 37  | IGITELGSSGSLVDPGYQPTTFKPPND     | 8.8       | 2      | 21    | 10.86  | 10.896 | 11.054 | 11.78   | 11.793  | 11.889  | 12.479  | 12.469  | 12.378  | 13.654   | 13.868   | 13.753   | 15.221    | 15.252    | 15.143    | 15.853    | 15.717    | 15.875    |
| E.cali P[4] alone | 13    | 23  | ITELGSSGSLV                     | 7.1       | 1      | 9     | 5.89   | 6.027  | 6.264  | 6.391   | 6.387   | 6.302   | 6.436   | 6.236   | 6.166   | 6.491    | 6.344    | 6.312    | 6.616     | 6.39      | 6.324     | 6.395     | 6.375     | 6.661     |
| E.cali P[4] alone | 13    | 37  | ITELGSSGSLVDPGYQPTTFKPPND       | 8.07      | 2      | 19    | 9.059  | 9.875  | 9.196  | 9.862   | 9.834   | 10.109  | 10.668  | 10.639  | 10.538  | 11.822   | 12.055   | 11.871   | 13.297    | 13.354    | 13.221    | 13.996    | 13.878    | 14.038    |
| E.cali P[4] alone | 16    | 37  | LGSSGSLVDPGYQPTTFKPPND          | 7.6       | 2      | 16    | 6.251  | 6.376  | 6.537  | 7.193   | 7.226   | 7.363   | 7.904   | 7.916   | 7.845   | 9.055    | 9.315    | 9.185    | 10.663    | 10.7      | 10.594    | 11.319    | 11.234    | 11.35     |
| E.cali P[4] alone | 16    | 38  | LGSSGSLVDPGYQPTTFKPPNDY         | 8.24      | 2      | 17    | 6.14   | 6.169  | 6.321  | 6.994   | 7.012   | 7.1     | 7.641   | 7.719   | 7.648   | 8.706    | 9.012    | 8.853    | 10.443    | 10.35     | 10.295    | 11.078    | 10.966    | 11.114    |
| E.cali P[4] alone | 16    | 39  | LGSSGSLVDPGYQPTTFKPPNDYW        | 9.8       | 3      | 18    | 5.648  | 5.794  | 5.966  | 6.536   | 6.578   | 6.697   | 7.131   | 7.186   | 7.151   | 8.172    | 8.432    | 8.359    | 9.577     | 9.709     | 9.654     | 10.465    | 10.312    | 10.387    |
| E.cali P[4] alone | 17    | 37  | GSSGSLVDPGYQPTTFKPPND           | 7.32      | 2      | 15    | 5.742  | 5.884  | 6.001  | 6.781   | 6.778   | 6.886   | 7.436   | 7.526   | 7.389   | 8.665    | 8.854    | 8.767    | 10.211    | 10.212    | 10.161    | 10.838    | 10.792    | 10.903    |
| E.cali P[4] alone | 17    | 39  | GSSGSLVDPGYQPTTFKPPNDYW         | 9.61      | 2      | 17    | 5.504  | 5.582  | 5.778  | 6.362   | 6.42    | 6.46    | 7.067   | 6.971   | 7.085   | 8.116    | 8.333    | 8.239    | 9.558     | 9.627     | 9.547     | 10.423    | 10.339    | 10.25     |
| E.cali P[4] alone | 24    | 37  | DGYPYQPTTFKPPND                 | 6.14      | 2      | 8     | 2.453  | 2.57   | 2.556  | 2.743   | 2.739   | 2.774   | 3.228   | 3.227   | 3.198   | 4.308    | 4.435    | 4.398    | 5.677     | 5.722     | 5.685     | 6.357     | 6.304     | 6.363     |
| E.cali P[4] alone | 24    | 39  | DGYPYQPTTFKPPNDYW               | 9.19      | 2      | 10    | 2.366  | 2.347  | 2.448  | 2.584   | 2.599   | 2.651   | 3.107   | 3.077   | 3.079   | 4.122    | 4.231    | 4.192    | 5.353     | 5.329     | 5.407     | 6.101     | 6.093     | 6.044     |
| E.cali P[4] alone | 38    | 41  | YWLL                            | 11.1      | 1      | 2     | 0.04   | 0.035  | 0.031  | 0.036   | 0.034   | 0.035   | 0.033   | 0.032   | 0.027   | 0.036    | 0.033    | 0.029    | 0.028     | 0.031     | 0.027     | 0.03      | 0.025     | 0.034     |
| E.cali P[4] alone | 40    | 51  | LUSNTNGVY                       | 7.65      | 2      | 10    | 3.477  | 3.433  | 3.61   | 3.753   | 3.681   | 3.711   | 3.843   | 3.85    | 3.91    | 4.003    | 4.065    | 4.021    | 4.479     | 4.476     | 4.501     | 5.263     | 4.985     | 5.085     |
| E.cali P[4] alone | 40    | 59  | LUSNTNGVYVVESTNNDF              | 8.18      | 2      | 18    | 3.412  | 3.572  | 3.625  | 3.854   | 3.896   | 3.946   | 3.994   | 4.037   | 4.044   | 4.371    | 4.474    | 4.421    | 5.104     | 5.203     | 5.144     | 6.12      | 5.949     | 5.997     |
| E.cali P[4] alone | 41    | 51  | LUSNTNGVY                       | 6.17      | 1      | 9     | 3.396  | 3.372  | 3.407  | 3.775   | 3.748   | 3.835   | 3.822   | 3.757   | 3.776   | 3.918    | 3.991    | 4.036    | 4.379     | 4.48      | 4.413     | 4.929     | 4.81      | 4.881     |
| E.cali P[4] alone | 42    | 59  | ISSNTNGVYVVESTNNDF              | 6.82      | 2      | 16    | 3.546  | 3.641  | 3.704  | 3.882   | 3.962   | 3.983   | 4.072   | 4.108   | 4.082   | 4.379    | 4.547    | 4.497    | 5.129     | 5.227     | 5.144     | 5.849     | 5.727     | 5.786     |
| E.cali P[4] alone | 52    | 59  | ESTNNDF                         | 4.28      | 1      | 6     | 1.187  | 1.217  | 1.183  | 1.207   | 1.241   | 1.197   | 1.319   | 1.323   | 1.323   | 1.644    | 1.613    | 1.136    | 1.112     | 1.114     | 1.112     | 1.166     | 1.581     | 1.572     |
| E.cali P[4] alone | 59    | 63  | FWTAV                           | 8.1       | 1      | 3     | 0.036  | 0.05   | 0.037  | 0.045   | 0.017   | 0.03    | 0.04    | 0.044   | 0.034   | 0.05     | 0.022    | 0.035    | 0.047     | 0.025     | 0.044     | 0.026     | 0.052     | 0.052     |
| E.cali P[4] alone | 59    | 64  | FWTAVI                          | 9.72      | 2      | 4     | 0.316  | 0.704  | 0.38   | 0.483   | 0.341   | 0.115   | 0.565   | 0.469   | 0.336   | 0.406    | 0.275    | 0.292    | 0.251     | 0.552     | 0.45      | 0.154     | 0.288     | 0.396     |
| E.cali P[4] alone | 60    | 63  | WTAV                            | 5.58      | 1      | 2     | 0.027  | 0.029  | 0.028  | 0.022   | 0.028   | 0.027   | 0.023   | 0.028   | 0.019   | 0.023    | 0.03     | 0.022    | 0.033     | 0.022     | 0.019     | 0.02      | 0.019     | 0.027     |
| E.cali P[4] alone | 60    | 64  | WTAVI                           | 7.81      | 1      | 3     | 0.046  | 0.049  | 0.048  | 0.043   | 0.037   | 0.048   | 0.037   | 0.038   | 0.034   | 0.037    | 0.035    | 0.031    | 0.043     | 0.034     | 0.03      | 0.041     | 0.04      | 0.033     |
| E.cali P[4] alone | 64    | 73  | IAVEPHVST                       | 4.1       | 2      | 7     | 1.479  | 1.502  | 1.547  | 1.942   | 1.914   | 1.949   | 2.262   | 2.255   | 2.269   | 2.409    | 2.475    | 2.438    | 2.875     | 2.865     | 2.862     | 3.387     | 3.336     | 3.386     |
| E.cali P[4] alone | 64    | 76  | IAVEPHVSTNRQ                    | 3.65      | 2      | 10    | 2.601  | 2.667  | 2.778  | 3.405   | 3.421   | 3.474   | 3.96    | 3.976   | 3.965   | 4.269    | 4.373    | 4.281    | 5.119     | 5.156     | 5.102     | 5.877     | 5.739     | 5.884     |
| E.cali P[4] alone | 64    | 79  | IAVEPHVSTNRQYIL                 | 7.05      | 3      | 13    | 2.421  | 2.555  | 2.547  | 3.444   | 3.549   | 3.549   | 4.17    | 4.276   | 4.228   | 4.535    | 4.666    | 4.595    | 5.368     | 5.361     | 5.301     | 6.008     | 5.894     | 6.01      |
| E.cali P[4] alone | 65    | 76  | AVEPHVST                        | 3.14      | 2      | 6     | 1.464  | 1.434  | 1.476  | 1.923   | 1.938   | 1.941   | 2.291   | 2.281   | 2.25    | 2.42     | 2.453    | 2.469    | 2.847     | 2.891     | 2.907     | 3.403     | 3.353     | 3.394     |
| E.cali P[4] alone | 65    | 76  | AVEPHVSTNRQ                     | 2.89      | 3      | 9     | 2.638  | 2.709  | 2.817  | 3.489   | 3.535   | 3.565   | 4.043   | 4.05    | 4.07    | 4.354    | 4.476    | 4.388    | 5.258     | 5.209     | 5.208     | 6.082     | 5.96      | 6.051     |
| E.cali P[4] alone | 65    | 79  | AVEPHVSTNRQYIL                  | 6.64      | 3      | 12    | 2.555  | 2.741  | 2.705  | 3.583   | 3.616   | 3.641   | 4.331   | 4.351   | 4.305   | 4.682    | 4.75     | 4.613    | 5.843     | 5.572     | 5.384     | 6.045     | 5.957     | 6.041     |
| E.cali P[4] alone | 74    | 79  | NRQYIL                          | 6.48      | 2      | 4     | 0.787  | 0.777  | 0.805  | 1.53    | 1.403   | 1.422   | 1.846   | 1.784   | 1.777   | 1.858    | 1.923    | 1.873    | 1.95      | 1.926     | 1.892     | 1.967     | 1.985     | 2.147     |
| E.cali P[4] alone | 80    | 86  | FGENKQF                         | 5.21      | 2      | 5     | 1.221  | 1.244  | 1.283  | 1.376   | 1.363   | 1.394   | 1.372   | 1.39    | 1.4     | 1.423    | 1.467    | 1.426    | 1.591     | 1.576     | 1.562     | 2.042     | 1.983     | 2.039     |
| E.cali P[4] alone | 80    | 97  | FGENKQFVENNNDKWK                | 8.1       | 4      | 16    | 2.302  | 2.484  | 2.51   | 2.712   | 2.698   | 2.713   | 3.067   | 3.052   | 3.031   | 4.045    | 4.027    | 3.973    | 5.305     | 5.2       | 5.129     | 6.115     | 5.919     | 6.187     |
| E.cali P[4] alone | 84    | 97  | KQFVENNNDKWK                    | 7.49      | 4      | 12    | 1.067  | 1.217  | 1.255  | 1.402   | 1.421   | 1.387   | 1.711   | 1.636   | 1.566   | 2.588    | 2.461    | 2.387    | 3.845     | 4.163     | 4.057     | 4.61      | 4.794     | 4.853     |
| E.cali P[4] alone | 98    | 100 | FEM                             | 6.24      | 1      | 1     | 0.021  | 0.029  | 0.03   | 0.023   | 0.031   | 0.026   | 0.024   | 0.031   | 0.027   | 0.025    | 0.021    | 0.029    | 0.027     | 0.024     | 0.027     | 0.028     | 0.027     | 0.028     |
| E.cali P[4] alone | 98    | 109 | FEMFKGSSQDGF                    | 8.35      | 2      | 10    | 3.522  | 3.605  | 3.682  | 3.755   | 3.791   | 3.899   | 3.883   | 3.995   | 3.994   | 3.948    | 4.093    | 4.08     | 4.08      | 4.187     | 4.158     | 4.204     | 4.18      | 4.162     |
| E.cali P[4] alone | 98    | 121 | FEMFKGSSQDGFNRRLTSSNRL          | 7.18      | 3      | 22    | 5.349  | 6.042  | 6.464  | 6.793   | 6.837   | 7.105   | 7.232   | 7.303   | 7.467   | 7.532    | 7.812    | 8.073    | 8.442     | 8.394     | 7.885     | 8.723     | 8.051     | 8.731     |
| E.cali P[4] alone | 101   | 109 | FKGSSQDGF                       | 4.88      | 2      | 7     | 3.768  | 3.869  | 3.946  | 4.279   | 4.214   | 4.235   | 4.412   | 4.394   | 4.391   | 4.433    | 4.543    | 4.486    | 4.588     | 4.567     | 4.553     | 4.669     | 4.572     | 4.705     |
| E.cali P[4] alone | 101   | 121 | FKGSSQDGFNRRLTSSNRL             | 5.31      | 3      | 19    | 6.519  | 7.098  | 7.186  | 8.085   | 8.046   | 8.25    | 8.686   | 8.73    | 8.583   | 8.99     | 9.181    | 8.917    | 9.802     | 9.574     | 9.419     | 9.973     | 9.714     | 10.246    |
| E.cali P[4] alone | 101   | 123 | FKGSSQDGFNRRLTSSNRLVGM          | 5.49      | 4      | 21    | 6.074  | 6.612  | 6.762  | 7.74    | 7.521   | 7.827   | 8.305   | 8.25    | 8.883   | 8.63     | 8.558    | 8.532    | 9.54      | 9.107     | 9.063     | 9.974     | 9.158     | 10.052    |
| E.cali P[4] alone | 101   | 125 | FKGSSQDGFNRRLTSSNRLVGM          | 7.76      | 4      | 23    | 6.059  | 6.51   | 6.669  | 7.127   | 7.363   | 7.45    | 7.814   | 7.996   | 7.748   | 8.305    | 8.153    | 8.233    | 8.4       | 8.616     | 8.58      | 9.312     | 9.182     | 9.052     |
| E.cali P[4] alone | 102   | 121 | FKGSSQDGFNRRLTSSNRL             | 4.92      | 4      | 18    | 6.014  | 6.408  | 6.47   | 7.473   | 7.46    | 7.686   | 8.036   | 7.967   | 7.961   | 8.465    | 8.569    | 8.319    | 9.194     | 8.736     | 8.834     | 9.289     | 8.817     | 9.644     |
| E.cali P[4] alone | 122   | 124 | VGM                             | 2.87      | 1      | 1     | -0.002 | 0.108  | 0.012  | 0.043   | 0.095   | -0.039  | 0.003   | -0.02   | 0.052   | 0.06     | 0.001    | 0.021    | -0.004    | -0.045    | -0.007    | 0.23      | 0.152     | 0.135     |
| E.cali P[4] alone | 122   | 134 | VGMLKYGGRRVWF                   | 9.52      | 3      | 11    | 9.959  | 9.98   | 10.11  | 13.18   | 12.27   | 10.93   | 1.31    | 1.184   | 1.112   | 1.377    | 1.29     | 1.191    | 1.693     | 1.501     | 1.428     | 2.64      | 1.982     | 2.615     |
| E.cali P[4] alone | 122   | 147 | VGMLKYGGRRVWFHGETPRATDSSN       | 7.37      | 4      | 23    | 1.447  | 1.948  | 2.229  | 2.731   | 2.696   | 2.55    | 3.451   | 3.148   | 2.949   | 3.709    | 3.332    | 3.23     | 4.306     | 4.26      | 4.68      | 7.251     | 5.726     | 7.767     |
| E.cali P[4] alone | 122   | 151 | VGMLKYGGRRVWFHGETPRATDSSNTADL   | 7.85      | 4      | 27    | 3.424  | 3.84   | 3.899  | 4.896   | 4.64    | 4.816   | 5.714   | 5.657   | 5.65    | 6.372    | 6.319    | 6.252    | 7.849     | 7.457     | 7.389     | 10.084    | 8.703     | 10.231    |
| E.cali P[4] alone | 122   | 153 | VGMLKYGGRRVWFHGETPRATDSSNTADLNN | 7.48      |        |       |        |        |        |         |         |         |         |         |         |          |          |          |           |           |           |           |           |           |



|                              |     |     |                  |      |   |    |       |        |       |        |       |        |        |        |        |        |        |        |        |        |        |        |        |        |
|------------------------------|-----|-----|------------------|------|---|----|-------|--------|-------|--------|-------|--------|--------|--------|--------|--------|--------|--------|--------|--------|--------|--------|--------|--------|
| E. coli P[4] with Thimerosal | 84  | 97  | KQFNVENNSDKWK    | 7.49 | 4 | 12 | 1.225 | 1.252  | 1.189 | 1.278  | 1.331 | 1.371  | 1.576  | 1.617  | 1.658  | 2.433  | 2.362  | 2.579  | 3.877  | 4.086  | 4.081  | 4.617  | 4.658  | 4.877  |
| E. coli P[4] with Thimerosal | 98  | 100 | FEM              | 6.24 | 1 | 1  | 0.035 | 0.031  | 0.023 | 0.026  | 0.028 | 0.027  | 0.023  | 0.02   | 0.025  | 0.02   | 0.022  | 0.024  | 0.026  | 0.03   | 0.024  | 0.036  | 0.037  | 0.035  |
| E. coli P[4] with Thimerosal | 98  | 109 | FEMFKGSSQGD      | 8.35 | 2 | 10 | 3.622 | 3.69   | 3.741 | 3.833  | 3.905 | 3.932  | 4.066  | 4.072  | 4.034  | 4.17   | 4.092  | 4.095  | 4.206  | 4.203  | 4.209  | 4.257  | 4.338  | 4.263  |
| E. coli P[4] with Thimerosal | 98  | 121 | FEMFKGSSQGD      | 7.18 | 3 | 22 | 6.423 | 6.684  | 6.661 | 7.168  | 7.339 | 7.217  | 8.213  | 7.94   | 7.83   | 8.623  | 8.073  | 8.15   | 8.846  | 8.8    | 8.827  | 10.015 | 10.068 | 9.776  |
| E. coli P[4] with Thimerosal | 101 | 109 | FKGSSQGD         | 4.88 | 2 | 7  | 3.895 | 4.035  | 3.969 | 4.176  | 4.268 | 4.242  | 4.417  | 4.294  | 4.397  | 4.513  | 4.489  | 4.476  | 4.564  | 4.604  | 4.6    | 4.567  | 4.598  | 4.508  |
| E. coli P[4] with Thimerosal | 101 | 121 | FKGSSQGD         | 5.31 | 3 | 19 | 7.218 | 7.551  | 7.289 | 8.022  | 8.18  | 8.212  | 8.77   | 8.704  | 8.55   | 9.519  | 9.204  | 9.176  | 9.987  | 9.961  | 10.002 | 10.961 | 11.036 | 10.695 |
| E. coli P[4] with Thimerosal | 101 | 123 | FKGSSQGD         | 5.49 | 4 | 21 | 6.745 | 7.058  | 6.991 | 7.504  | 7.745 | 7.749  | 8.584  | 8.234  | 8.269  | 9.1    | 8.862  | 8.831  | 9.637  | 9.691  | 9.779  | 11.252 | 11.215 | 10.93  |
| E. coli P[4] with Thimerosal | 101 | 125 | FKGSSQGD         | 7.76 | 4 | 23 | 6.368 | 6.543  | 6.387 | 7.1    | 7.53  | 7.422  | 8.049  | 7.977  | 7.87   | 8.872  | 8.466  | 8.53   | 9.225  | 9.277  | 9.279  | 11.103 | 11.119 | 11.109 |
| E. coli P[4] with Thimerosal | 102 | 121 | VGSSQGD          | 4.92 | 4 | 18 | 5.565 | 5.896  | 6.636 | 7.182  | 7.711 | 7.85   | 8.167  | 7.97   | 7.87   | 8.712  | 8.462  | 8.541  | 9.35   | 9.496  | 9.354  | 10.395 | 10.404 | 9.997  |
| E. coli P[4] with Thimerosal | 122 | 124 | KGM              | 2.87 | 1 | 1  | 0.106 | -0.021 | 0.013 | -0.019 | 0.036 | -0.038 | 0.035  | 0.023  | 0.013  | 0.057  | 0.079  | 0.077  | 0.109  | 0.04   | 0.045  | 0.475  | 0.495  | 0.495  |
| E. coli P[4] with Thimerosal | 122 | 134 | VGMLKYGRRVWF     | 9.52 | 3 | 11 | 1.027 | 1.05   | 1.011 | 1.15   | 1.153 | 1.112  | 1.22   | 1.193  | 1.198  | 1.41   | 1.414  | 1.372  | 2.22   | 2.175  | 2.199  | 4.134  | 4.348  | 4.227  |
| E. coli P[4] with Thimerosal | 122 | 147 | VGMLKYGRRVWF     | 7.37 | 4 | 23 | 2.386 | 2.402  | 2.236 | 2.856  | 3.289 | 2.508  | 3.495  | 2.969  | 3.279  | 4.596  | 4.719  | 4.221  | 7.106  | 7.794  | 6.97   | 9.247  | 9.78   | 9.221  |
| E. coli P[4] with Thimerosal | 122 | 151 | VGMLKYGRRVWF     | 7.85 | 4 | 27 | 3.911 | 4.009  | 3.937 | 4.84   | 4.969 | 4.922  | 5.987  | 6.002  | 5.94   | 7.32   | 7.293  | 7.281  | 9.683  | 9.802  | 9.794  | 12.623 | 12.67  | 12.508 |
| E. coli P[4] with Thimerosal | 122 | 153 | VGMLKYGRRVWF     | 7.48 | 4 | 29 | 5.737 | 5.786  | 5.628 | 6.655  | 6.774 | 6.717  | 8.112  | 7.822  | 7.997  | 9.22   | 9.146  | 9.686  | 12.53  | 12.438 | 12.331 | 15.119 | 15.014 | 15.047 |
| E. coli P[4] with Thimerosal | 122 | 155 | VGMLKYGRRVWF     | 7.78 | 4 | 31 | 5.829 | 6.064  | 5.926 | 7.352  | 7.395 | 7.461  | 8.761  | 8.685  | 8.737  | 10.144 | 10.203 | 10.151 | 12.908 | 12.98  | 13.092 | 16.369 | 16.521 | 16.146 |
| E. coli P[4] with Thimerosal | 124 | 134 | MLKYGRRVWF       | 9.2  | 3 | 9  | 1.013 | 1.03   | 1.011 | 1.091  | 1.121 | 1.081  | 1.203  | 1.147  | 1.165  | 1.378  | 1.339  | 1.349  | 2.005  | 1.993  | 2.035  | 3.637  | 3.647  | 3.533  |
| E. coli P[4] with Thimerosal | 124 | 151 | MLKYGRRVWF       | 7.49 | 4 | 25 | 3.665 | 3.817  | 3.642 | 4.484  | 4.66  | 4.591  | 5.68   | 5.597  | 5.486  | 6.889  | 6.754  | 6.762  | 8.935  | 8.965  | 9.019  | 11.833 | 11.442 | 11.071 |
| E. coli P[4] with Thimerosal | 125 | 134 | LYGGRVWF         | 8.88 | 3 | 8  | 1.233 | 1.222  | 1.168 | 1.238  | 1.247 | 1.208  | 1.298  | 1.25   | 1.237  | 1.482  | 1.39   | 1.43   | 2.245  | 2.182  | 2.052  | 3.755  | 3.612  | 3.593  |
| E. coli P[4] with Thimerosal | 125 | 151 | LYGGRVWF         | 7.17 | 4 | 24 | 4.007 | 4.104  | 4.051 | 4.929  | 5.085 | 5.039  | 6.219  | 6.049  | 6.037  | 7.491  | 7.388  | 7.401  | 9.681  | 9.711  | 9.767  | 12.301 | 12.147 | 11.904 |
| E. coli P[4] with Thimerosal | 125 | 153 | LYGGRVWF         | 6.72 | 4 | 26 | 5.763 | 6.029  | 5.827 | 6.826  | 6.957 | 6.878  | 8.112  | 7.997  | 8.084  | 9.639  | 9.494  | 9.508  | 12.021 | 12.207 | 12.18  | 14.951 | 14.968 | 14.531 |
| E. coli P[4] with Thimerosal | 125 | 155 | LYGGRVWF         | 7.15 | 4 | 28 | 6.128 | 6.445  | 6.215 | 7.689  | 7.822 | 7.853  | 9.047  | 9.138  | 9.16   | 10.367 | 10.564 | 10.712 | 13.211 | 13.355 | 13.362 | 16.075 | 16.254 | 15.966 |
| E. coli P[4] with Thimerosal | 135 | 151 | HGETPRATTSSNTADL | 4.1  | 3 | 14 | 3.026 | 3.177  | 3.121 | 4.149  | 4.208 | 4.324  | 5.521  | 5.46   | 5.413  | 6.684  | 6.688  | 6.668  | 8.556  | 8.325  | 8.276  | 9.802  | 9.805  | 9.645  |
| E. coli P[4] with Thimerosal | 135 | 155 | HGETPRATTSSNTADL | 4.78 | 3 | 18 | 4.783 | 4.908  | 4.754 | 6.273  | 6.357 | 6.284  | 7.858  | 7.78   | 7.793  | 9.223  | 8.915  | 9.083  | 11.04  | 11.096 | 11.112 | 12.397 | 12.507 | 12.324 |
| E. coli P[4] with Thimerosal | 154 | 162 | IIHSEF           | 8.4  | 2 | 7  | 0.157 | 0.149  | 0.127 | 0.205  | 0.227 | 0.201  | 0.477  | 0.487  | 0.481  | 1.059  | 1.073  | 1.058  | 1.59   | 1.597  | 1.62   | 2.396  | 2.439  | 2.368  |
| E. coli P[4] with Thimerosal | 156 | 161 | IIHSE            | 3.79 | 2 | 4  | 0.111 | 0.087  | 0.125 | 0.186  | 0.218 | 0.387  | 0.435  | 0.402  | 0.936  | 0.916  | 0.923  | 1.23   | 1.288  | 1.293  | 1.604  | 1.67   | 1.577  |        |
| E. coli P[4] with Thimerosal | 156 | 162 | IIHSEF           | 6.9  | 2 | 5  | 0.127 | 0.126  | 0.127 | 0.198  | 0.196 | 0.195  | 0.441  | 0.454  | 0.448  | 0.979  | 0.98   | 0.968  | 1.303  | 1.334  | 1.338  | 1.729  | 1.733  | 1.66   |
| E. coli P[4] with Thimerosal | 156 | 162 | IIHSEF           | 5.6  | 2 | 4  | 0.133 | 0.102  | 0.131 | 0.195  | 0.2   | 0.192  | 0.426  | 0.441  | 0.435  | 0.932  | 0.925  | 0.919  | 1.166  | 1.237  | 1.226  | 1.401  | 1.477  | 1.377  |
| E. coli P[4] with Thimerosal | 163 | 170 | YIIPRSQE         | 4.82 | 2 | 5  | 2.185 | 2.316  | 2.311 | 2.5    | 2.568 | 2.554  | 2.796  | 2.869  | 2.834  | 3.183  | 3.242  | 3.215  | 3.291  | 3.355  | 3.4    | 3.322  | 3.39   | 3.357  |
| E. coli P[4] with Thimerosal | 163 | 173 | YIIPRSQESK       | 4.63 | 2 | 8  | 3.51  | 3.493  | 3.595 | 3.963  | 3.906 | 3.766  | 4.009  | 4.03   | 4.075  | 4.532  | 4.713  | 4.53   | 4.699  | 4.63   | 4.777  | 4.558  | 4.746  | 4.639  |
| E. coli P[4] with Thimerosal | 163 | 175 | YIIPRSQESK       | 4.57 | 3 | 10 | 3.746 | 3.994  | 3.983 | 4.573  | 4.76  | 4.8    | 5.151  | 5.317  | 5.208  | 5.625  | 5.739  | 5.627  | 5.695  | 5.895  | 5.929  | 5.775  | 5.917  | 5.777  |
| E. coli P[4] with Thimerosal | 174 | 181 | NEVINL           | 6.32 | 1 | 6  | 0.57  | 0.667  | 0.759 | 1.187  | 1.381 | 1.409  | 2.497  | 2.455  | 2.587  | 3.787  | 3.822  | 3.838  | 4.476  | 4.518  | 4.544  | 4.585  | 4.591  | 4.664  |
| E. coli P[4] with 13A1       | 1   | 3   | MQY              | 4.26 | 1 | 1  | 1.044 | 1.025  | 1.019 | 1.05   | 1.031 | 1.07   | 1.028  | 1.022  | 1.075  | 1.054  | 1.062  | 1.052  | 1.076  | 1.058  | 1.039  | 1.044  | 1.067  | 1.041  |
| E. coli P[4] with 13A1       | 1   | 6   | MQYKKA           | 4.99 | 2 | 4  | 3.139 | 3.321  | 3.249 | 3.312  | 3.186 | 3.25   | 3.273  | 3.253  | 3.259  | 3.281  | 3.287  | 3.252  | 3.333  | 3.317  | 3.341  | 3.3    | 3.31   | 3.284  |
| E. coli P[4] with 13A1       | 1   | 10  | MQYKANSKF        | 5.88 | 3 | 8  | 5.59  | 5.931  | 5.801 | 5.903  | 5.651 | 5.849  | 5.754  | 5.829  | 5.848  | 5.857  | 5.799  | 5.909  | 5.914  | 5.877  | 5.864  | 5.918  | 5.918  | 5.795  |
| E. coli P[4] with 13A1       | 1   | 12  | MQYKANSKFG       | 6.41 | 3 | 10 | 7.071 | 7.438  | 7.264 | 7.371  | 7.118 | 7.249  | 7.315  | 7.212  | 7.263  | 7.331  | 7.341  | 7.279  | 7.406  | 7.372  | 7.362  | 7.364  | 7.413  | 7.271  |
| E. coli P[4] with 13A1       | 3   | 10  | YIKANSKF         | 4.36 | 3 | 6  | 4.081 | 4.486  | 4.338 | 4.57   | 4.411 | 4.481  | 4.443  | 4.378  | 4.528  | 4.514  | 4.493  | 4.47   | 4.52   | 4.53   | 4.564  | 4.491  | 4.536  | 4.449  |
| E. coli P[4] with 13A1       | 11  | 15  | IGITE            | 4.47 | 1 | 3  | 2.727 | 2.91   | 2.857 | 2.889  | 2.771 | 2.849  | 2.866  | 2.842  | 2.867  | 2.892  | 2.894  | 2.855  | 2.932  | 2.912  | 2.9    | 2.898  | 2.919  | 2.877  |
| E. coli P[4] with 13A1       | 11  | 23  | IGITELGSSGVL     | 8.57 | 2 | 11 | 7.268 | 7.739  | 7.447 | 7.757  | 7.476 | 7.749  | 7.731  | 7.757  | 7.838  | 7.858  | 7.966  | 8.153  | 8.135  | 8.135  | 8.425  | 8.535  | 8.327  |        |
| E. coli P[4] with 13A1       | 11  | 37  | IGITELGSSGVL     | 8.8  | 2 | 19 | 9.386 | 10     | 9.72  | 10.3   | 9.865 | 10.088 | 10.651 | 10.549 | 10.579 | 11.421 | 11.383 | 11.297 | 12.634 | 12.61  | 12.562 | 13.872 | 13.678 | 13.678 |
| E. coli P[4] with 13A1       | 13  | 23  | ITELGSSGVL       | 7.1  | 1 | 9  | 5.206 | 5.758  | 5.597 | 5.673  | 5.553 | 5.737  | 5.517  | 5.332  | 5.565  | 5.506  | 5.686  | 5.698  | 5.632  | 5.902  | 5.95   | 6.104  | 6.267  | 6.128  |
| E. coli P[4] with 13A1       | 13  | 37  | ITELGSSGVL       | 8.07 | 2 | 19 | 7.662 | 8.029  | 7.907 | 8.337  | 8.405 | 8.224  | 8.792  | 8.655  | 8.723  | 9.46   | 9.476  | 9.389  | 10.689 | 10.725 | 10.658 | 11.951 | 12.044 | 11.81  |
| E. coli P[4] with 13A1       | 16  | 37  | LGSSGVL          | 7.6  | 2 | 16 | 4.993 | 5.296  | 5.151 | 5.616  | 5.504 | 5.644  | 5.909  | 5.992  | 6.793  | 6.949  | 6.661  | 7.946  | 7.921  | 7.937  | 9.175  | 9.226  | 9.107  |        |
| E. coli P[4] with 13A1       | 16  | 38  | LGSSGVL          | 8.24 | 2 | 17 | 4.43  | 5.444  | 5.351 | 5.898  | 5.516 | 5.779  | 6.239  | 6.055  | 6.193  | 5.34   | 5.987  | 5.873  | 6.508  | 6.41   | 6.383  | 7.751  | 7.813  | 7.556  |
| E. coli P[4] with 13A1       | 16  | 39  | LGSSGVL          | 9.8  | 3 | 18 | 4.572 | 4.877  | 4.724 | 5.175  | 4.94  | 5.048  | 5.625  | 5.454  | 5.509  | 6.214  | 6.199  | 6.102  | 7.255  | 7.222  | 7.181  | 8.367  | 8.396  | 8.222  |
| E. coli P[4] with 13A1       | 17  | 37  | GSSSGVL          | 7.32 | 2 | 15 | 4.303 | 4.604  | 4.417 | 4.933  | 4.675 | 4.862  | 5.354  | 5.212  | 5.329  | 6.004  | 6.045  | 6.004  | 7.291  | 7.232  | 7.18   | 8.61   | 8.64   | 8.531  |
| E. coli P[4] with 13A1       | 17  | 39  | GSSSGVL          | 9.61 | 2 | 17 | 4.443 | 4.627  | 4.475 | 4.97   | 4.8   | 4.85   | 5.309  | 5.271  | 5.376  | 6.076  | 6.077  | 5.952  | 7.132  | 7.089  | 7.134  | 8.237  | 8.223  | 8.201  |
| E. coli P[4] with 13A1       | 24  | 37  | DGYPTTFFKPPND    | 6.14 | 2 | 8  | 2.327 | 2.516  | 2.475 | 2.592  | 2.556 | 2.564  | 2.821  | 2.787  | 2.778  | 3.461  | 3.482  | 3.417  | 4.323  | 4.254  | 4.257  | 5.002  | 5.06   | 4.931  |
| E. coli P[4] with 13A1       | 24  | 39  | DGYPTTFFKPPND    | 9.19 | 2 | 10 | 2.254 | 2.399  | 2.316 | 2.482  | 2.366 | 2.423  | 2.683  | 2.694  | 2.651  | 3.328  | 3.315  | 3.268  | 4.066  | 4.062  | 4.071  | 4.685  | 4.69   | 4.679  |
| E. coli P[4] with 13A1       | 38  | 41  | YWLL             | 11.1 | 1 | 2  | 0.03  | 0.026  | 0.026 | 0.024  | 0.032 | 0.025  | 0.028  | 0.023  | 0.025  | 0.023  | 0.027  | 0.025  | 0.023  | 0.024  | 0.026  | 0.025  | 0.021  | 0.021  |
| E. coli P[4] with 13A1       | 40  | 51  | LUSSTNGVY        | 7.65 | 2 | 10 | 1.844 | 2.03   | 1.913 | 2.73   | 2.642 | 2.685  | 3.519  | 3.523  | 3.47   | 3.768  | 3.749  | 3.666  | 3.897  | 3.815  | 3.777  | 3.885  | 3.841  | 3.809  |
| E. coli P[4] with 13A1       | 40  | 59  | LUSSTNGVY        | 8.18 |   |    |       |        |       |        |       |        |        |        |        |        |        |        |        |        |        |        |        |        |

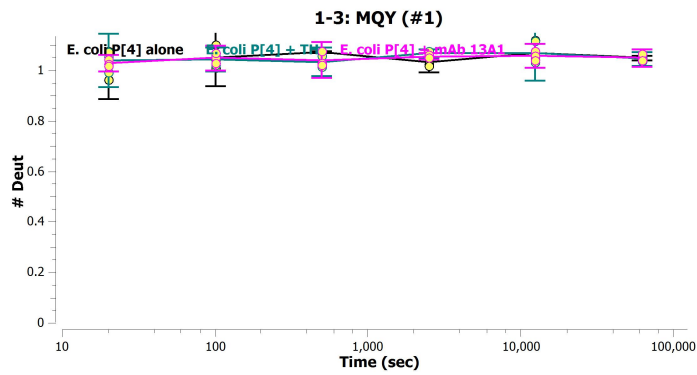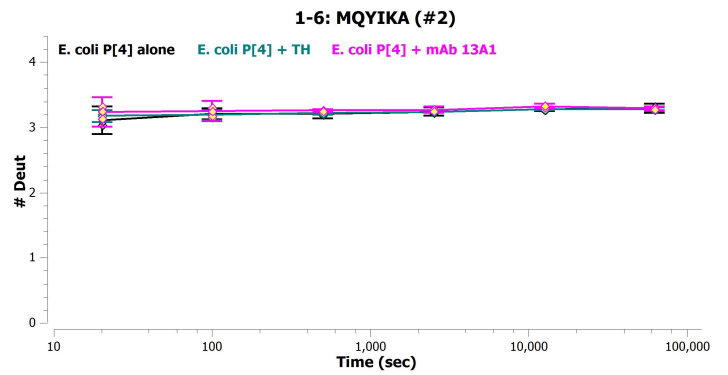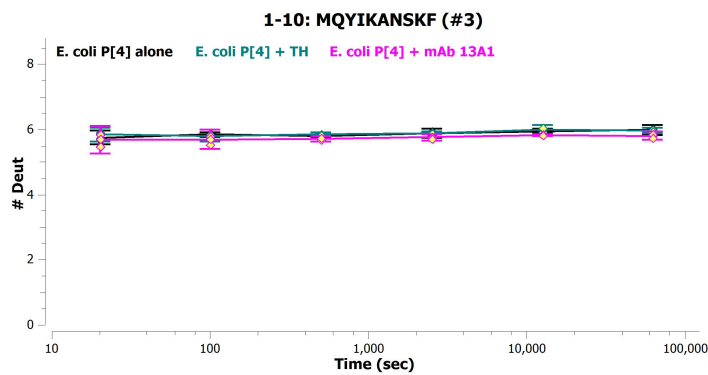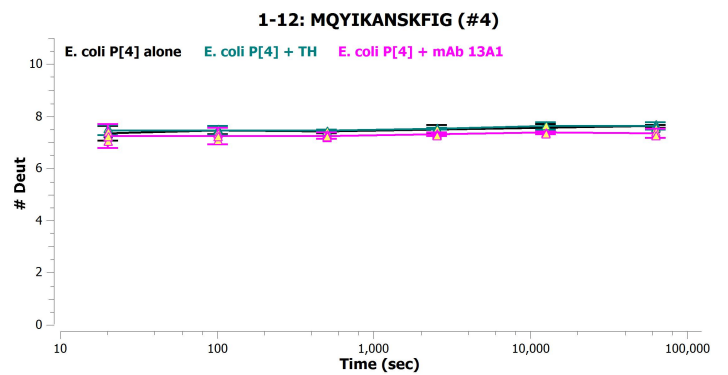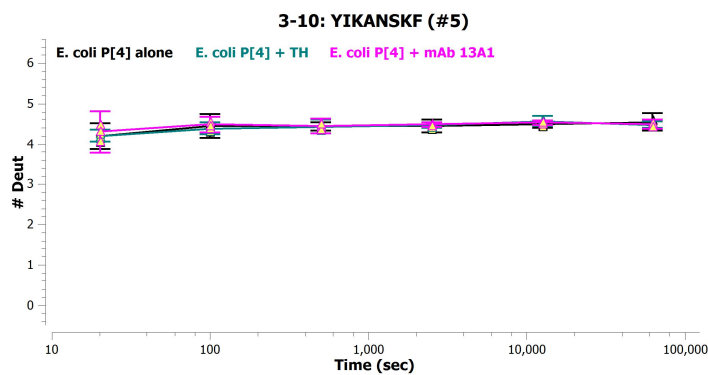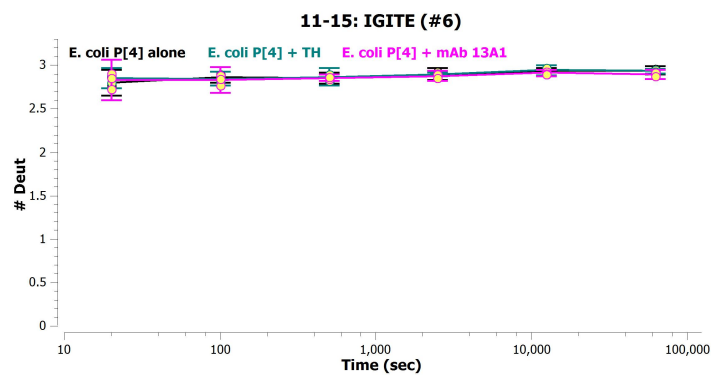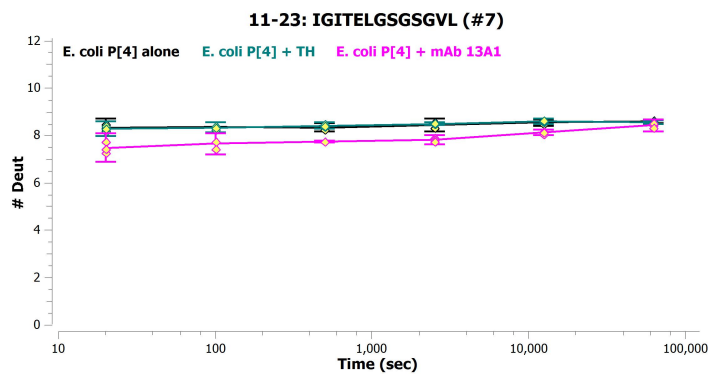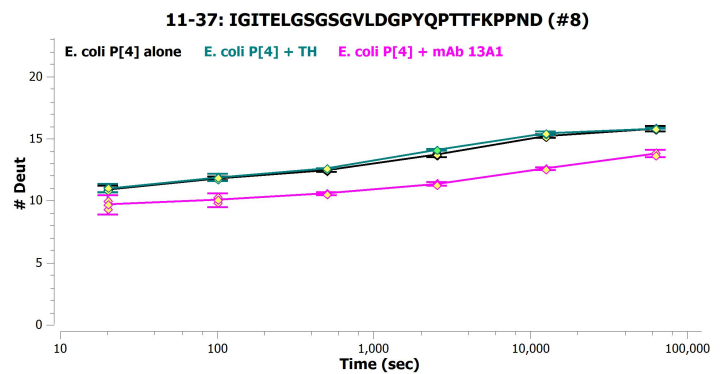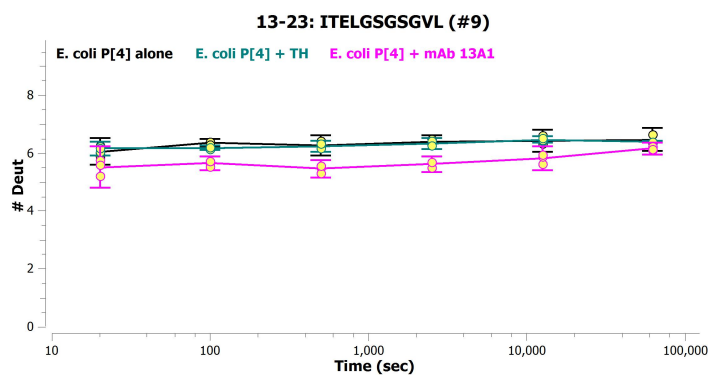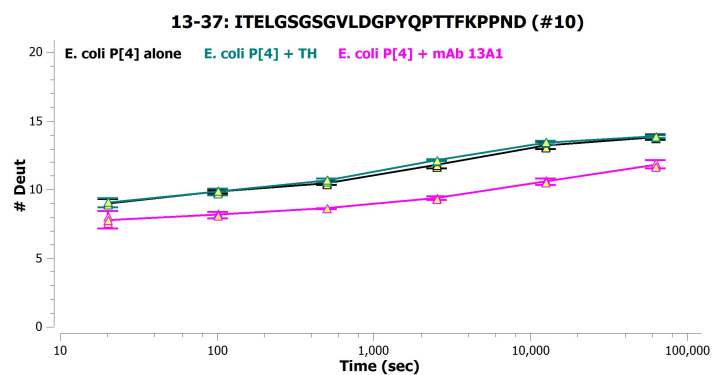

**16-37: LGSGSGVLDGPYQPTTFKPPND (#11)**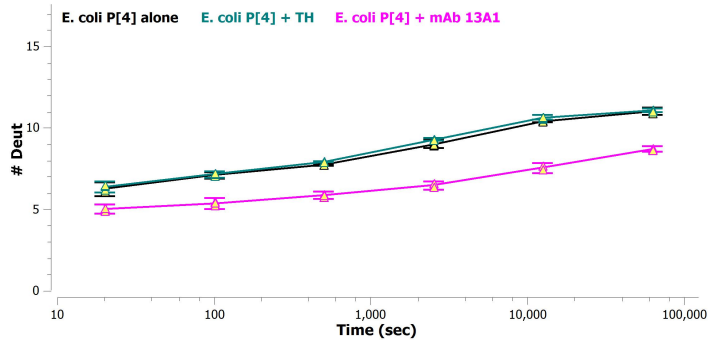**16-38: LGSGSGVLDGPYQPTTFKPPNDY (#12)**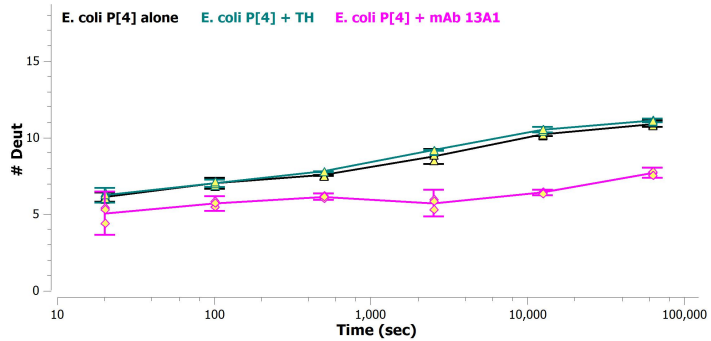**16-39: LGSGSGVLDGPYQPTTFKPPNDYW (#13)**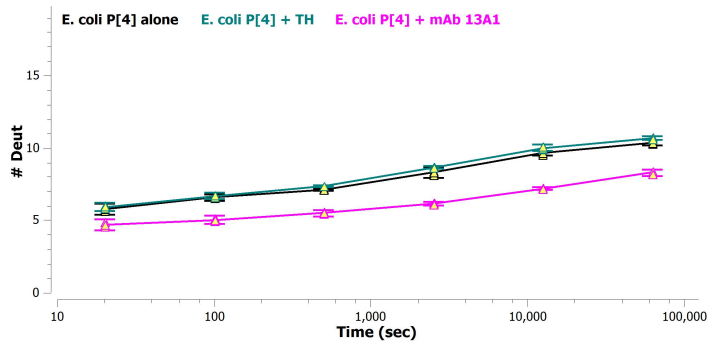**17-37: GSGSGVLDGPYQPTTFKPPND (#14)**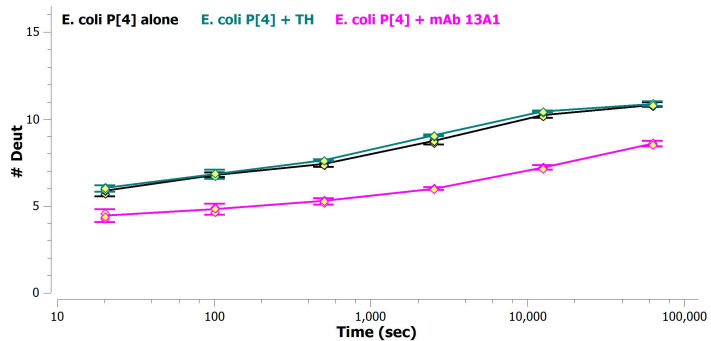**17-39: GSGSGVLDGPYQPTTFKPPNDYW (#15)**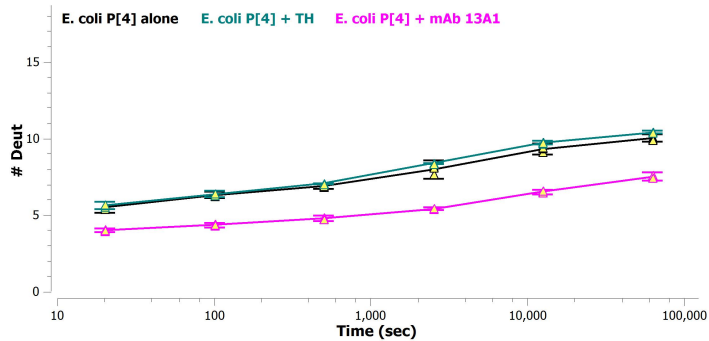**24-37: DGPYQPTTFKPPND (#16)**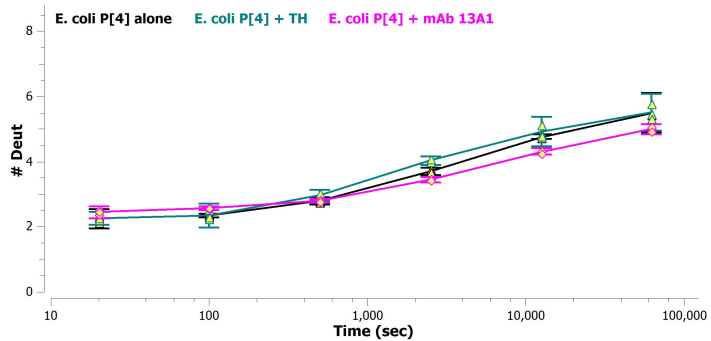**24-39: DGPYQPTTFKPPNDYW (#17)**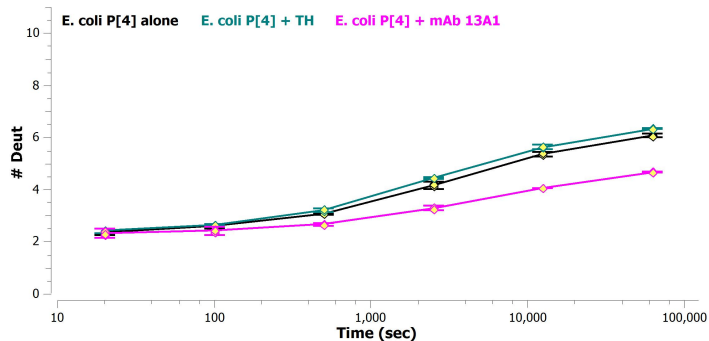**38-41: YWLL (#18)**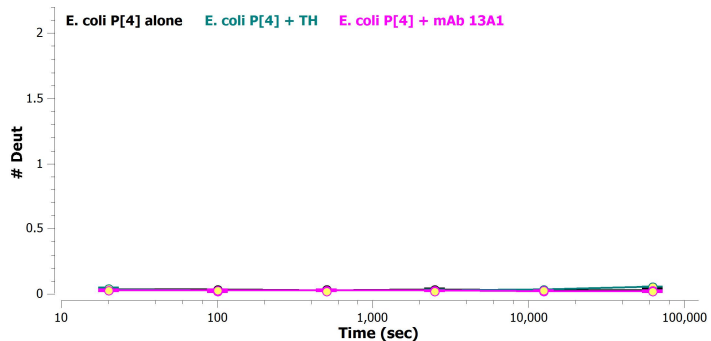**40-51: LLISSNTNGVVY (#19)**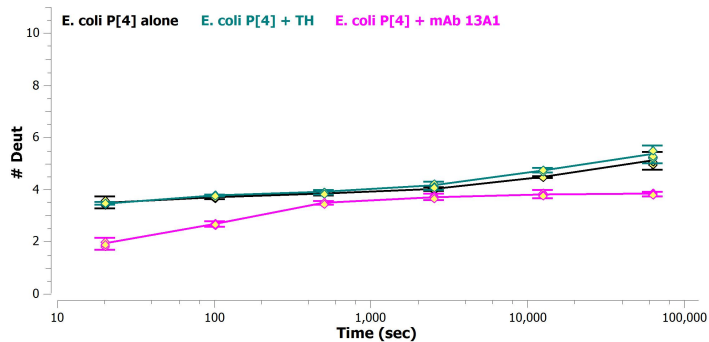**40-59: LLISSNTNGVVYESTNNDF (#20)**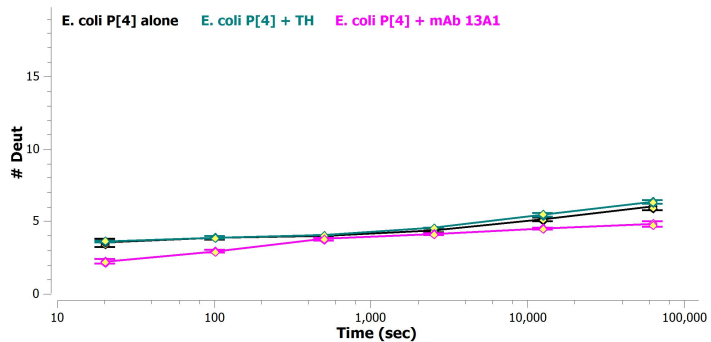

**41-51: LISSNTNGVVY (#21)**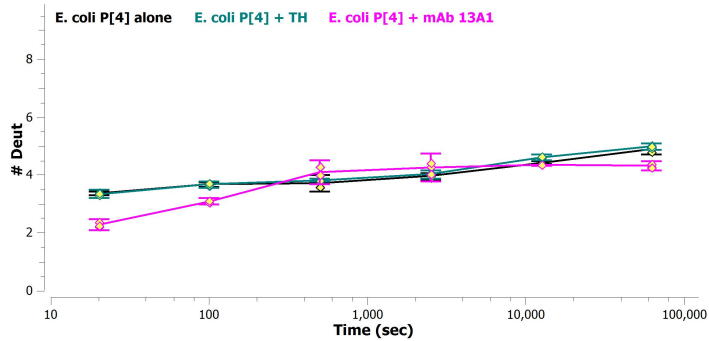**42-59: ISSNTNGVVYESTNNDF (#22)**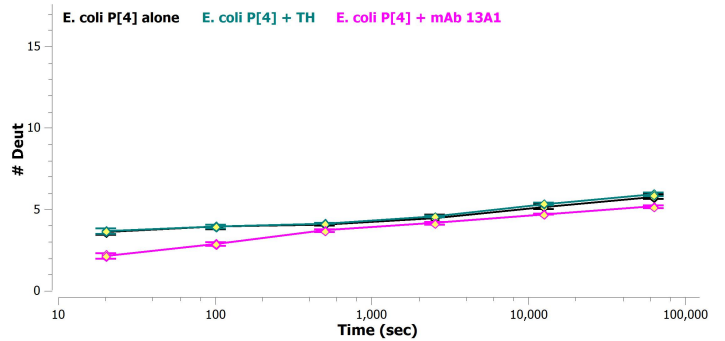**52-59: ESTNNDF (#23)**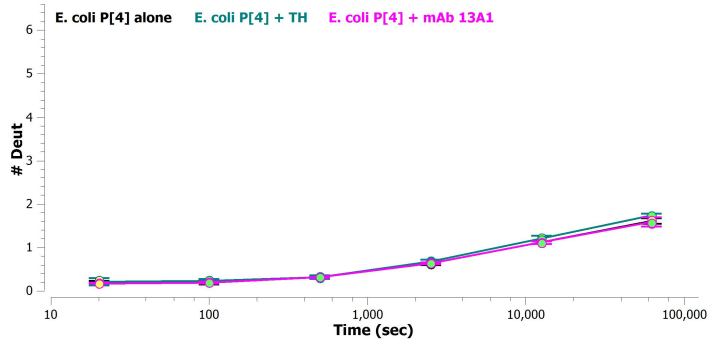**59-63: FWTAV (#24)**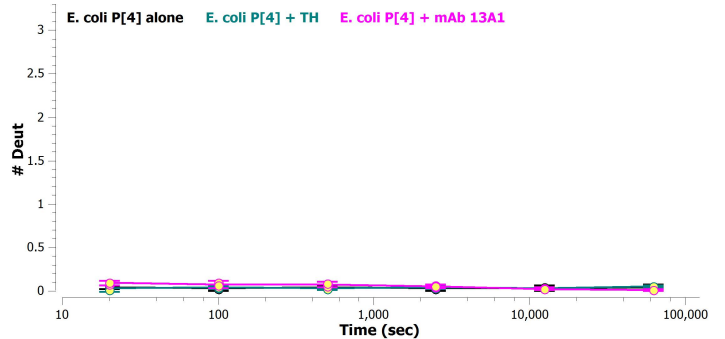**59-64: FWTAVI (#25)**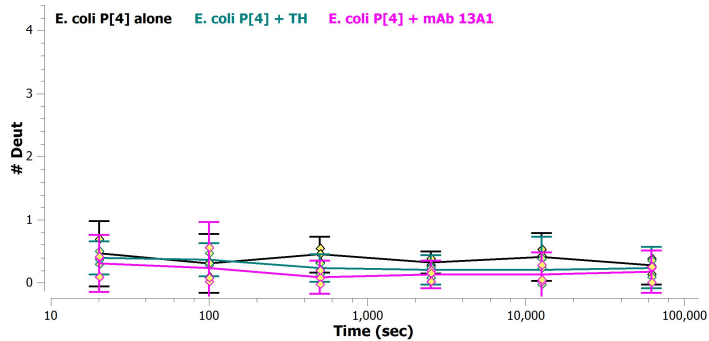**60-63: WTAV (#26)**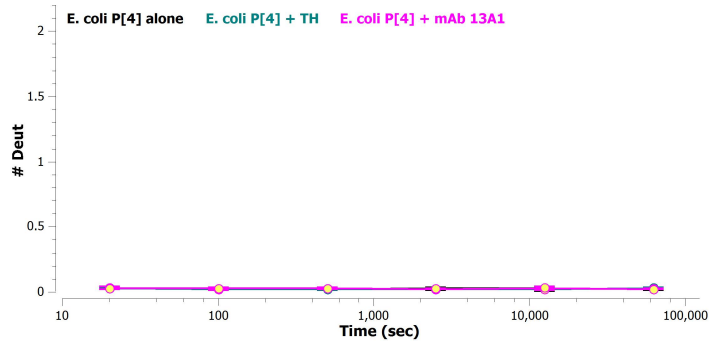**60-64: WTAVI (#27)**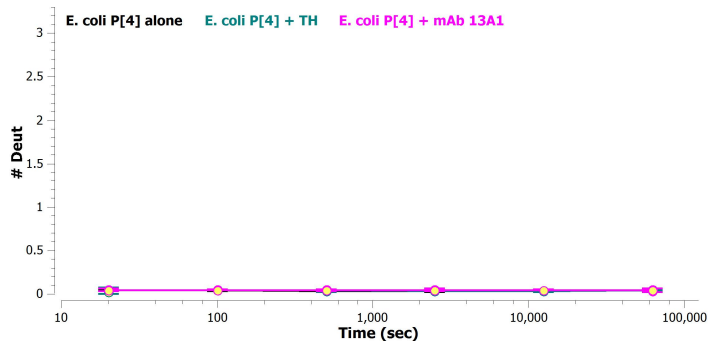**64-73: IAVEPHVSQT (#28)**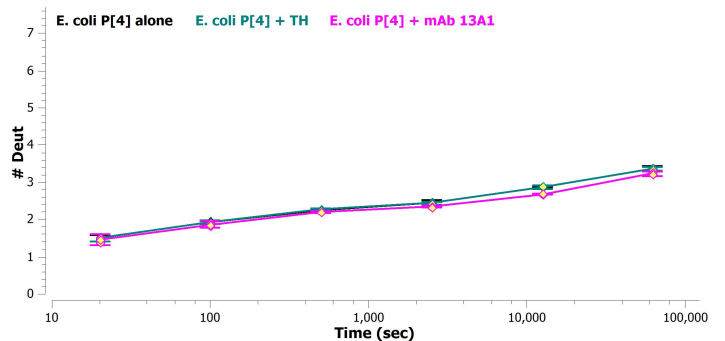**64-76: IAVEPHVSQTNRQ (#29)**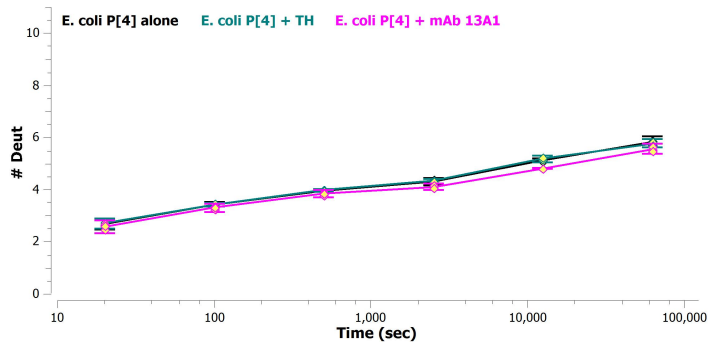**64-79: IAVEPHVSQTNRQYIL (#30)**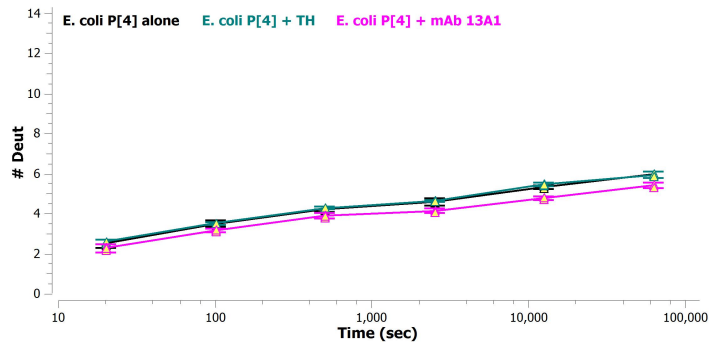

**65-73: AVEPHVSQT (#31)**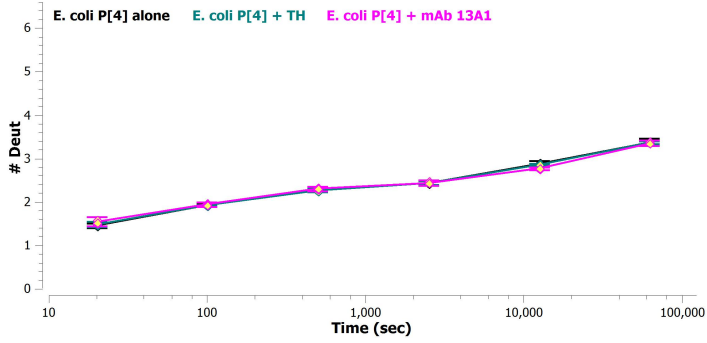**65-76: AVEPHVSQTNRQ (#32)**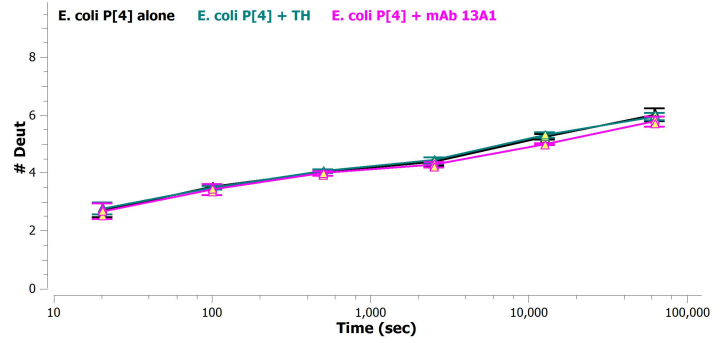**65-79: AVEPHVSQTNRQYIL (#33)**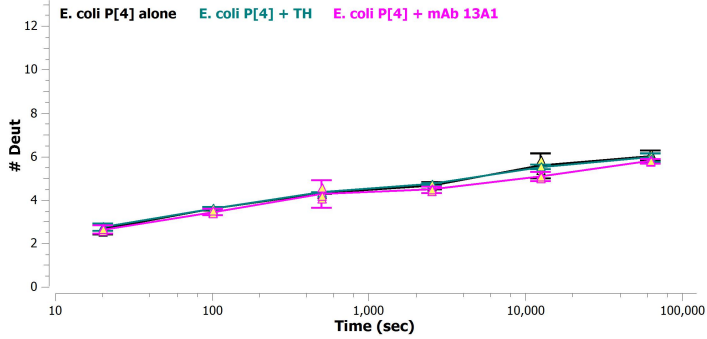**74-79: NRQYIL (#34)**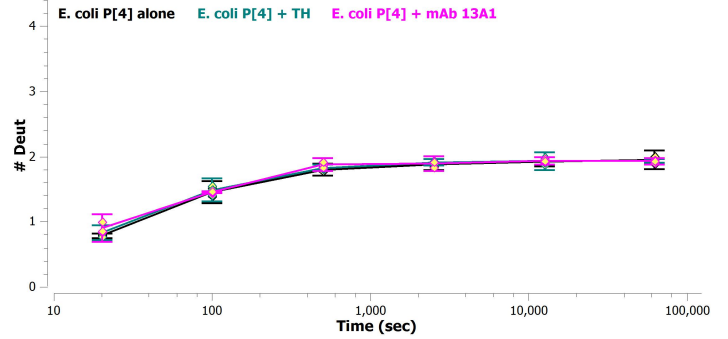**80-86: FGENKQF (#35)**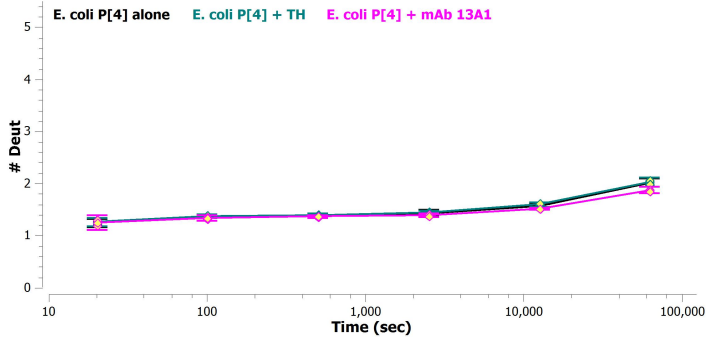**80-97: FGENKQFNVENNSDKWKF (#36)**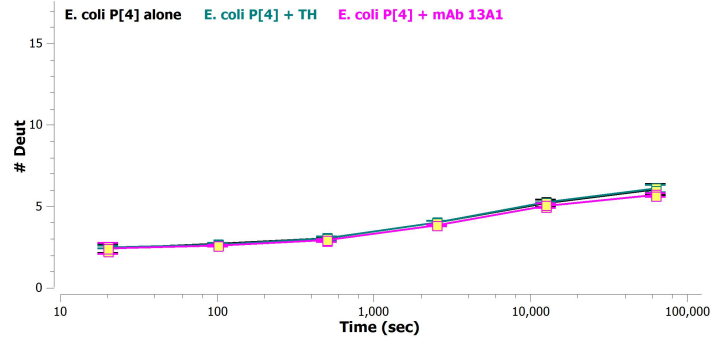**84-97: KQFNVENNSDKWKF (#37)**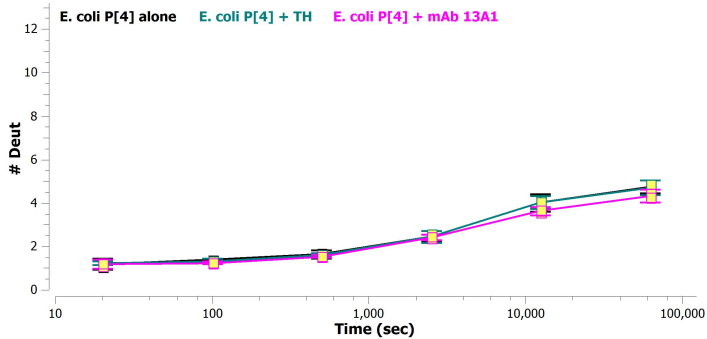**98-100: FEM (#38)**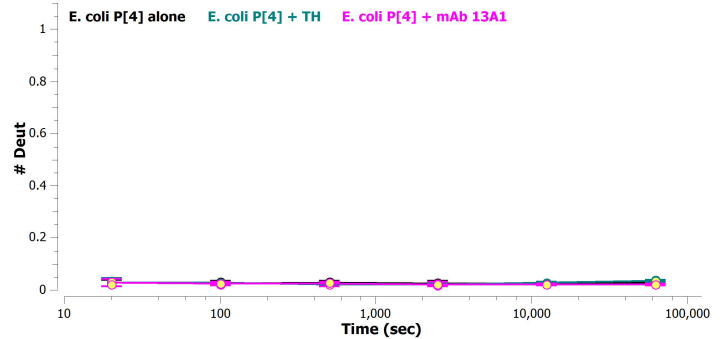**98-109: FEMFKGSSQGDF (#39)**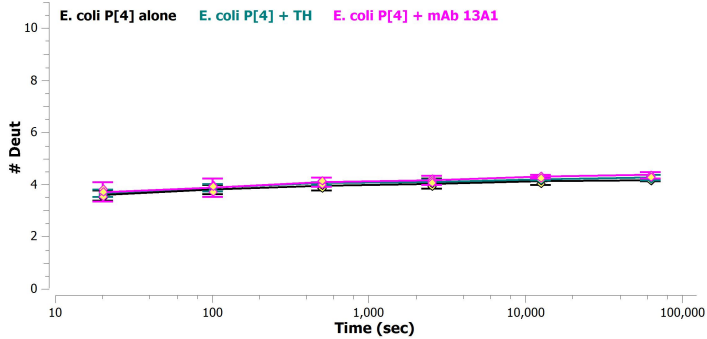**98-121: FEMFKGSSQGDFSNRRRLTSSNRL (#40)**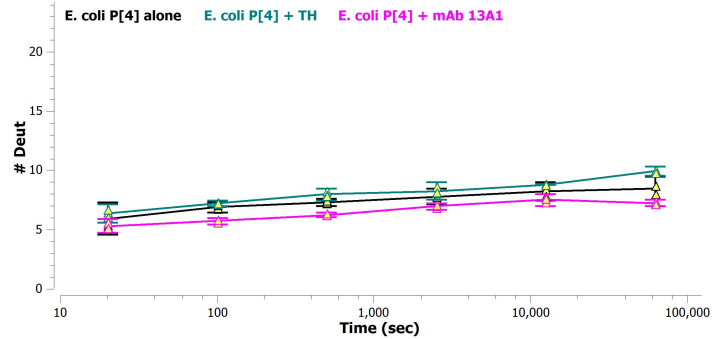

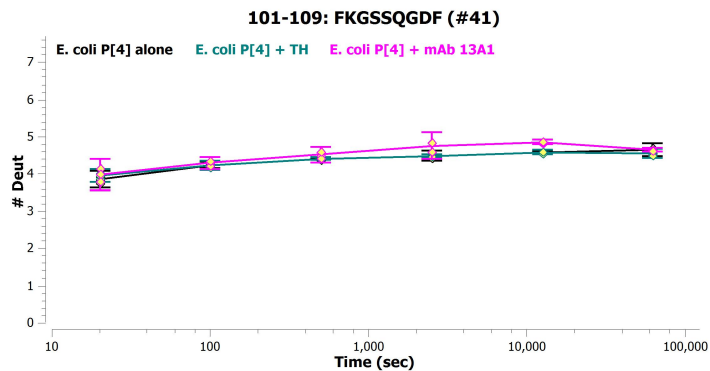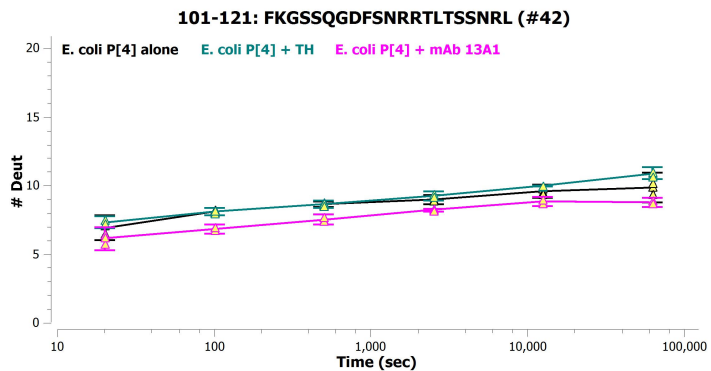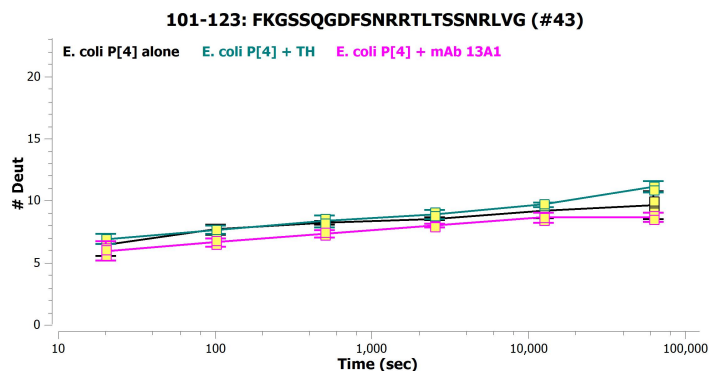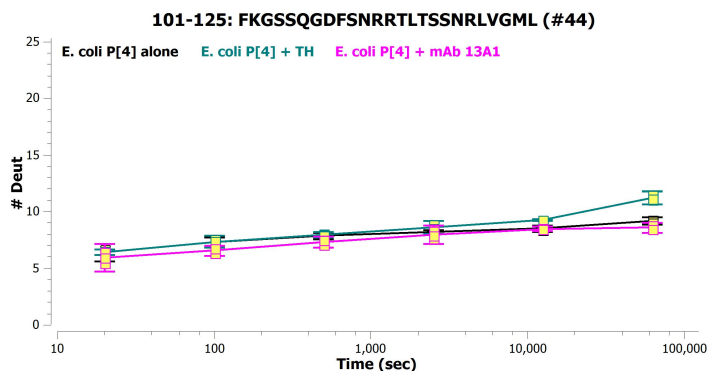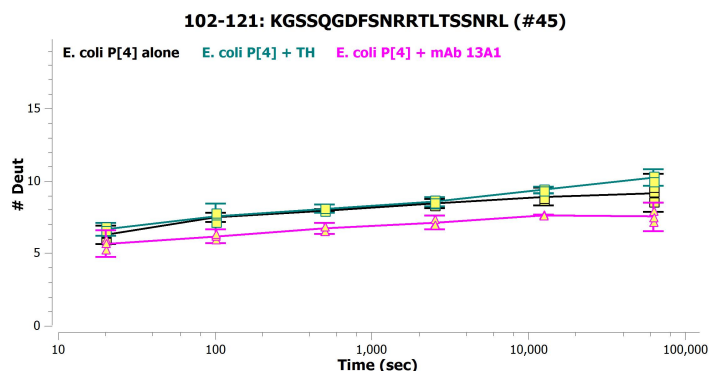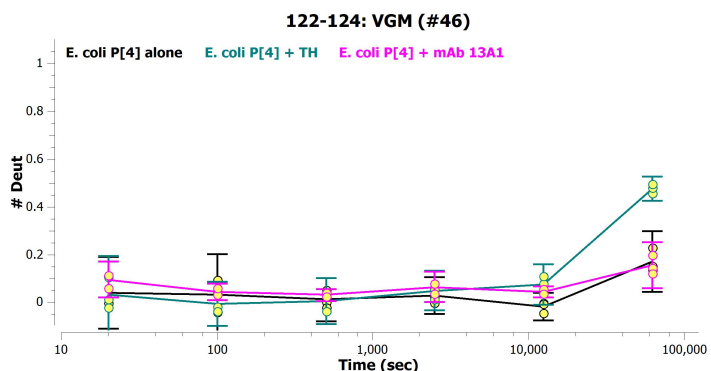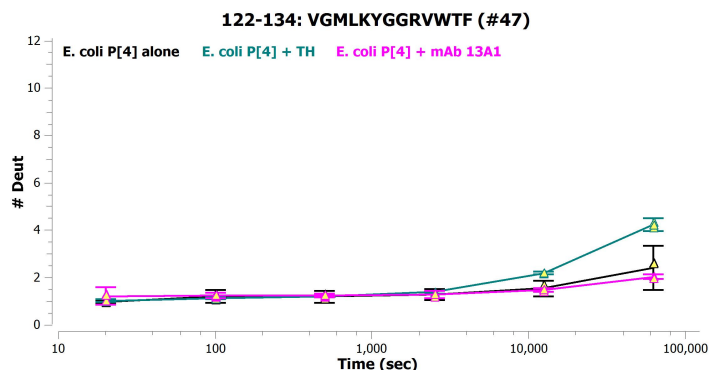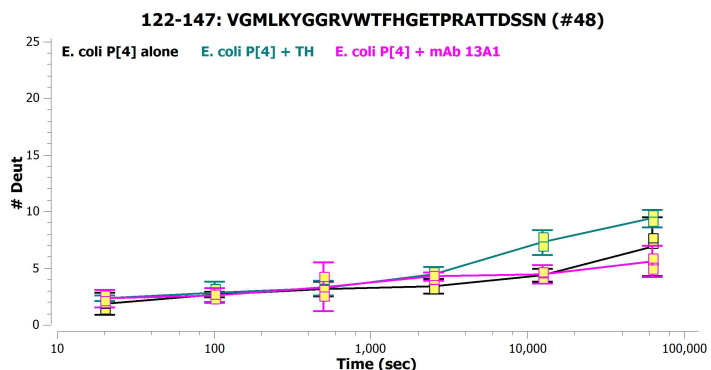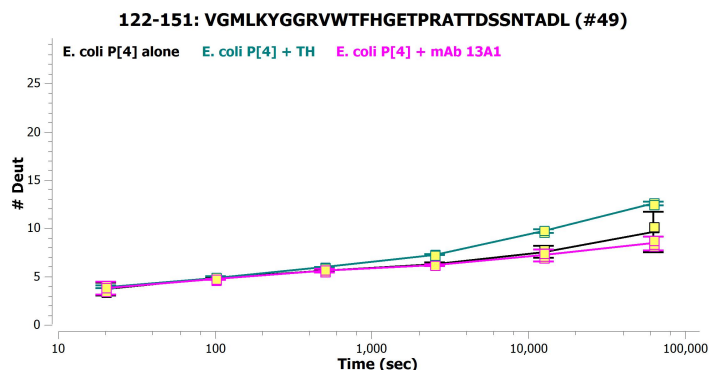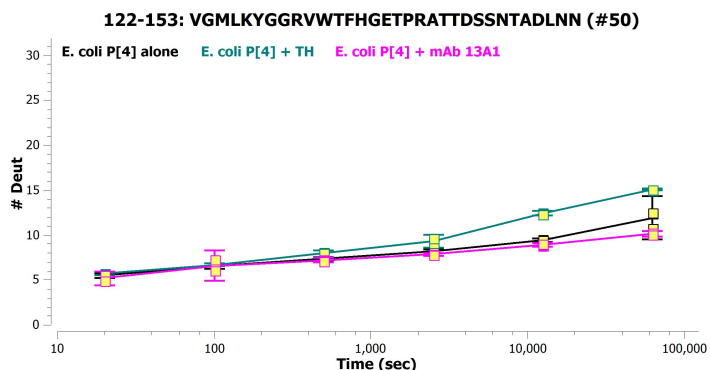

122-155: VGMLKYGGRVWTFHGETPRATTDSSNTADLNNIS (#51)

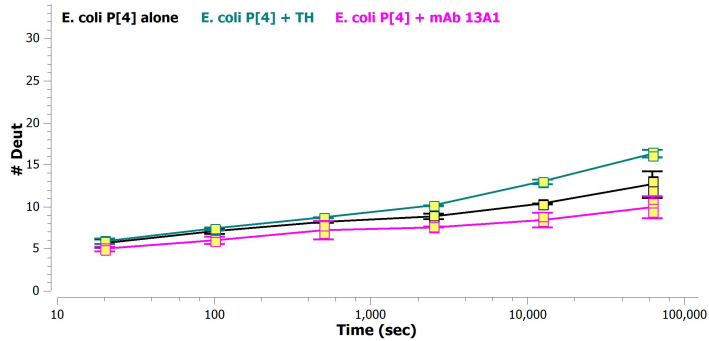

124-134: MLKYGGRVWTF (#52)

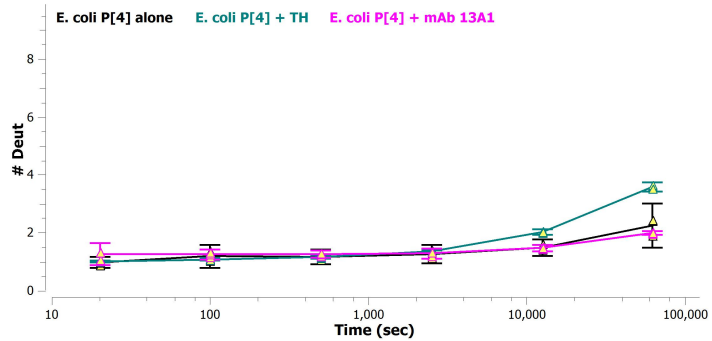

124-151: MLKYGGRVWTFHGETPRATTDSSNTADL (#53)

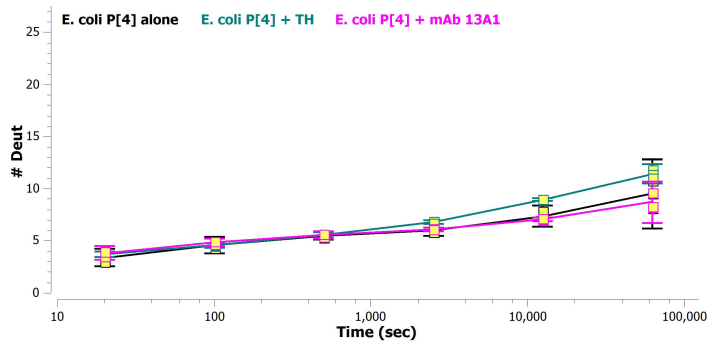

125-134: LKYGGRVWTF (#54)

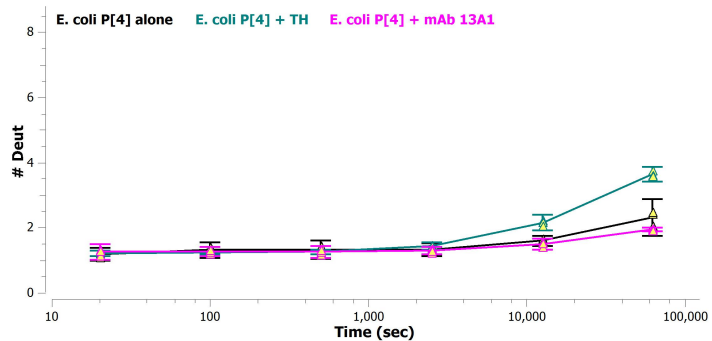

125-151: LKYGGRVWTFHGETPRATTDSSNTADL (#55)

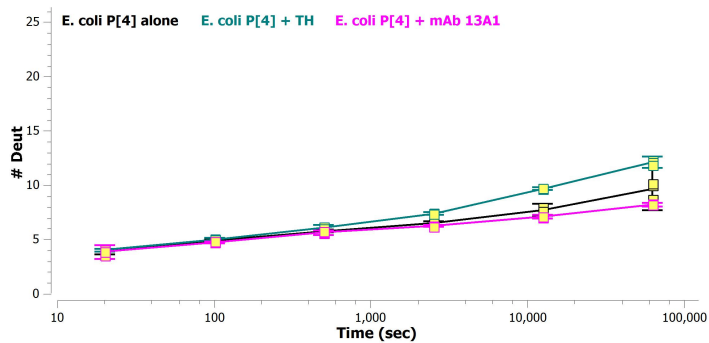

125-153: LKYGGRVWTFHGETPRATTDSSNTADLNN (#56)

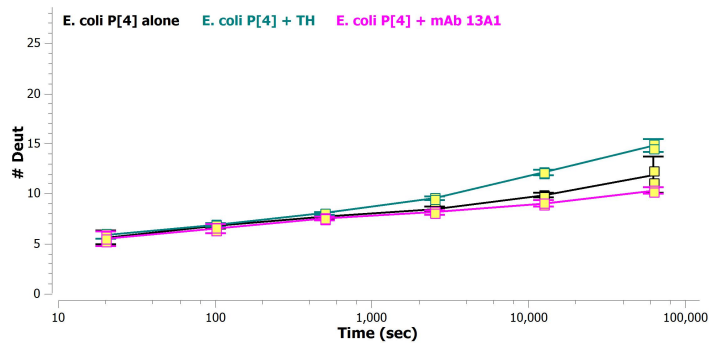

125-155: LKYGGRVWTFHGETPRATTDSSNTADLNNIS (#57)

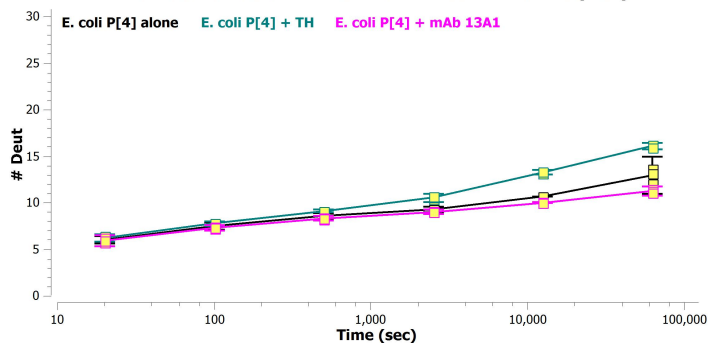

135-151: HGETPRATTDSSNTADL (#58)

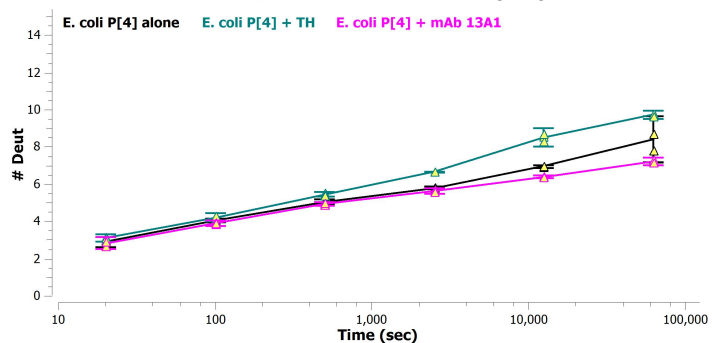

135-155: HGETPRATTDSSNTADLNNIS (#59)

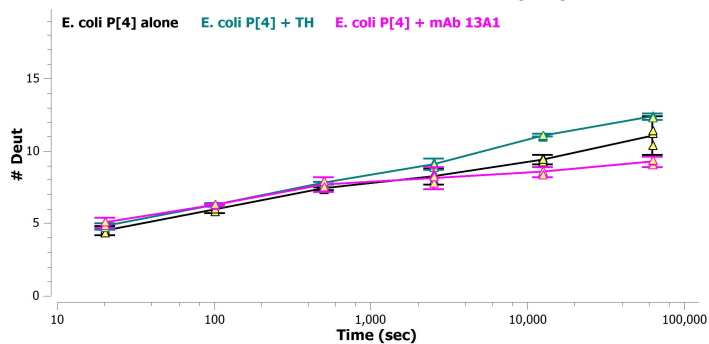

154-162: ISIIHSEF (#60)

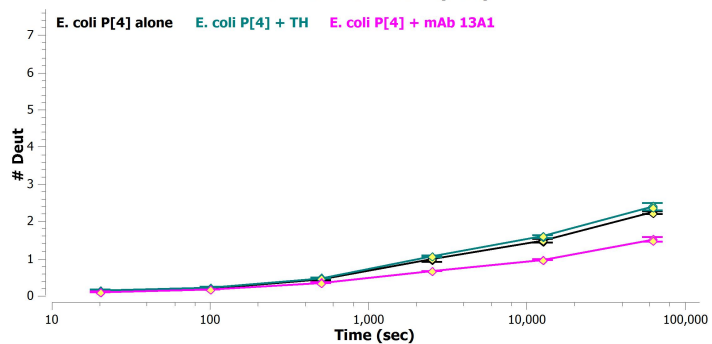

**156-161: IIIHSE (#61)**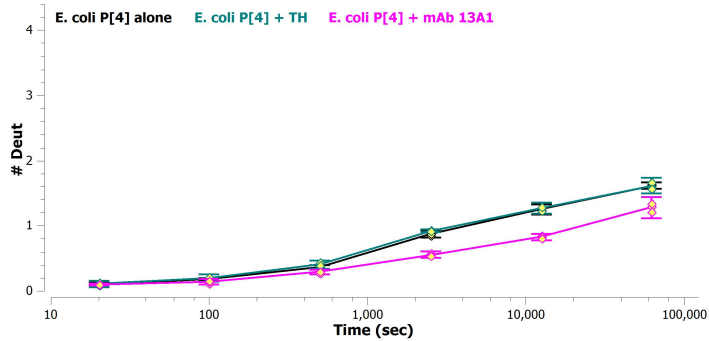**156-162: IIIHSEF (#62)**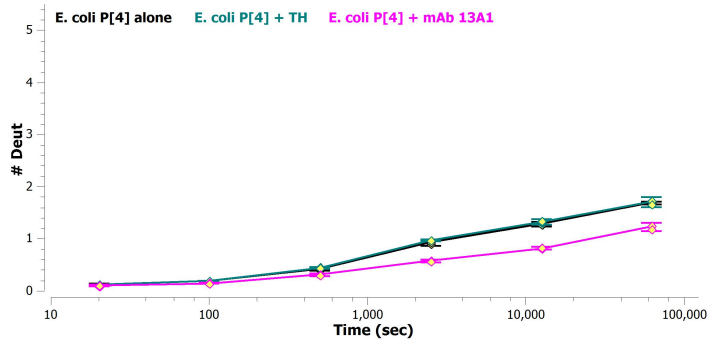**157-162: IIHSEF (#63)**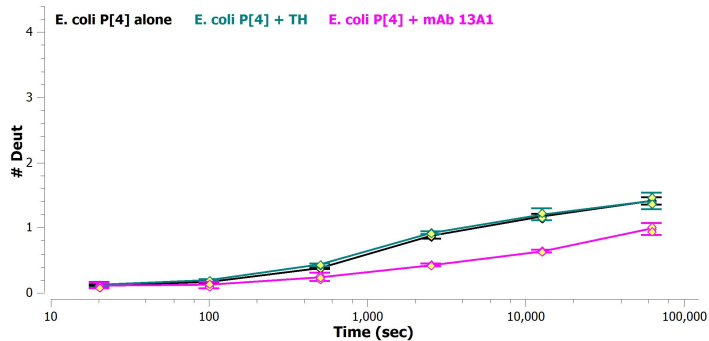**163-170: YIIPRSQE (#64)**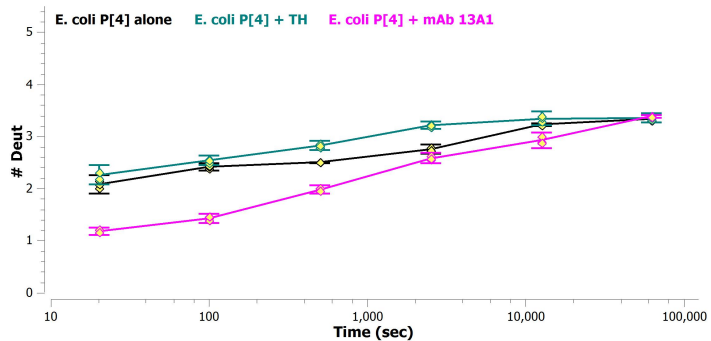**163-173: YIIPRSQESKC (#65)**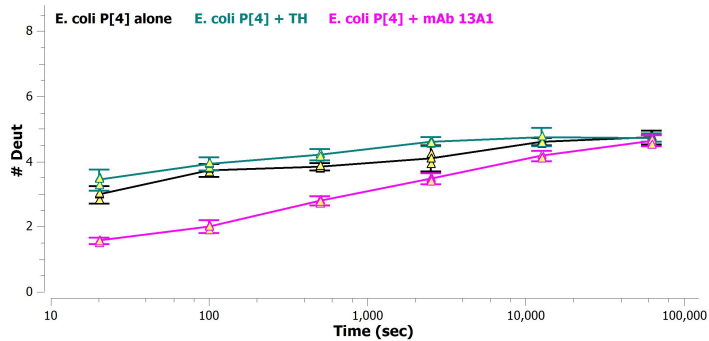**163-175: YIIPRSQESKCNE (#66)**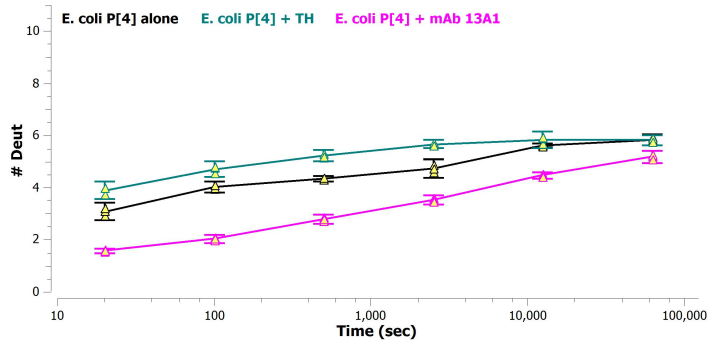**174-181: NEYINNGL (#67)**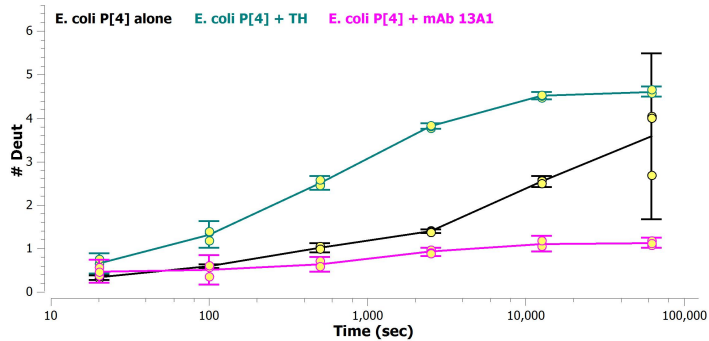



| State        | Start | End | Sequence                   | Search RT | Charge | Max D | 20s #D | 20s #D | 20s #D | 100s #D | 100s #D | 100s #D | 500s #D | 500s #D | 500s #D | 2500s #D | 2500s #D | 2500s #D | 12500s #D | 12500s #D | 12500s #D | 62500s #D | 62500s #D | 62500s #D |
|--------------|-------|-----|----------------------------|-----------|--------|-------|--------|--------|--------|---------|---------|---------|---------|---------|---------|----------|----------|----------|-----------|-----------|-----------|-----------|-----------|-----------|
| Pa [4] alone | 1     | 6   | MQYIKA                     | 4.94      | 2      | 4     | 2.875  | 2.999  | 2.958  | 3.035   | 3.173   | 3.107   | 3.118   | 3.224   | 3.052   | 3.163    | 3.177    | 3.202    | 3.145     | 3.217     | 3.33      | 3.234     | 3.252     |           |
| Pa [4] alone | 1     | 10  | MQYIKANSKF                 | 5.85      | 3      | 8     | 5.993  | 6.138  | 5.966  | 5.898   | 5.967   | 6.052   | 5.832   | 5.909   | 5.968   | 5.836    | 5.952    | 5.976    | 6.036     | 6.041     | 6.046     | 6.073     | 6.071     | 6.091     |
| Pa [4] alone | 1     | 12  | MQYIKANSKFIG               | 6.37      | 3      | 10    | 7.51   | 7.396  | 6.658  | 6.902   | 7.356   | 7.427   | 7.208   | 7.187   | 7.098   | 7.417    | 7.282    | 7.446    | 7.411     | 7.516     | 7.497     | 7.611     | 7.649     | 7.649     |
| Pa [4] alone | 3     | 10  | YIKANSKF                   | 4.31      | 3      | 6     | 4.359  | 4.499  | 4.446  | 4.461   | 4.479   | 4.471   | 4.444   | 4.393   | 4.426   | 4.389    | 4.423    | 4.4      | 4.454     | 4.448     | 4.472     | 4.492     | 4.42      | 4.431     |
| Pa [4] alone | 11    | 14  | IGIT                       | 3.88      | 1      | 2     | 1.676  | 1.668  | 1.692  | 1.881   | 1.894   | 1.903   | 1.908   | 1.861   | 1.936   | 2.002    | 1.958    | 1.945    | 1.908     | 1.932     | 2.019     | 2.111     | 2.054     | 2.041     |
| Pa [4] alone | 11    | 16  | IGITEL                     | 7.56      | 1      | 4     | 3.543  | 3.688  | 3.611  | 3.697   | 3.663   | 3.692   | 3.696   | 3.614   | 3.637   | 3.631    | 3.656    | 3.631    | 3.686     | 3.683     | 3.661     | 3.703     | 3.649     | 3.67      |
| Pa [4] alone | 11    | 23  | IGITELSGSGVL               | 8.57      | 2      | 11    | 8.727  | 8.735  | 8.456  | 8.484   | 8.552   | 8.608   | 8.593   | 8.472   | 8.445   | 8.469    | 8.599    | 8.527    | 8.563     | 8.622     | 8.584     | 8.667     | 8.529     | 8.594     |
| Pa [4] alone | 11    | 37  | IGITELSGSGVLDGYPQPTTFKPPND | 8.81      | 2      | 21    | 11.647 | 11.407 | 12.209 | 12.162  | 12.338  | 12.964  | 12.744  | 12.76   | 13.947  | 14.13    | 13.976   | 15.293   | 15.299    | 15.298    | 16.036    | 15.879    | 15.903    | 15.903    |
| Pa [4] alone | 13    | 16  | ITEL                       | 4.88      | 1      | 2     | 1.955  | 1.761  | 1.805  | 1.785   | 1.869   | 1.816   | 1.731   | 1.778   | 1.816   | 1.774    | 1.775    | 1.738    | 1.755     | 1.898     | 1.782     | 1.827     | 1.717     | 1.781     |
| Pa [4] alone | 13    | 23  | ITELSGSGVL                 | 7.09      | 2      | 9     | 6.198  | 6.406  | 5.689  | 6.067   | 6.145   | 6.047   | 6.49    | 6.019   | 5.901   | 5.969    | 6.175    | 6.186    | 6.241     | 6.241     | 6.163     | 6.447     | 6.187     | 6.089     |
| Pa [4] alone | 13    | 37  | ITELSGSGVLDGYPQPTTFKPPND   | 8.06      | 2      | 19    | 9.446  | 9.535  | 9.399  | 10.038  | 10.189  | 10.283  | 11.105  | 10.85   | 10.927  | 12.072   | 12.225   | 12.209   | 13.423    | 13.443    | 13.449    | 14.127    | 14.022    | 14.023    |
| Pa [4] alone | 15    | 37  | ELSGSGVLDGYPQPTTFKPPND     | 7.79      | 2      | 17    | 7.394  | 7.545  | 7.276  | 8.191   | 8.089   | 8.202   | 9.4     | 9.192   | 9.257   | 10.534   | 10.644   | 10.562   | 11.692    | 11.777    | 11.65     | 12.418    | 12.238    | 12.29     |
| Pa [4] alone | 16    | 37  | LGSGSGVLDGYPQPTTFKPPND     | 7.58      | 3      | 16    | 6.594  | 6.85   | 6.699  | 7.402   | 7.451   | 7.492   | 8.149   | 8.03    | 8.072   | 9.178    | 9.273    | 9.278    | 10.539    | 10.564    | 10.52     | 11.223    | 11.121    | 11.126    |
| Pa [4] alone | 16    | 38  | LGSGSGVLDGYPQPTTFKPPNDY    | 8.21      | 2      | 17    | 6.467  | 6.742  | 6.502  | 7.432   | 7.413   | 7.462   | 8.166   | 7.906   | 7.966   | 9.063    | 9.181    | 9.126    | 10.46     | 10.489    | 10.417    | 11.138    | 11.027    | 11.089    |
| Pa [4] alone | 16    | 39  | LGSGSGVLDGYPQPTTFKPPNDYW   | 9.78      | 3      | 18    | 6.08   | 6.353  | 6.215  | 6.897   | 6.98    | 7.027   | 7.512   | 7.472   | 7.502   | 8.403    | 8.573    | 8.564    | 9.774     | 9.858     | 9.82      | 10.482    | 10.438    | 10.411    |
| Pa [4] alone | 17    | 37  | SGSGSGVLDGYPQPTTFKPPND     | 7.31      | 2      | 15    | 6.115  | 6.374  | 6.173  | 6.934   | 6.992   | 7.031   | 7.674   | 7.67    | 8.875   | 8.996    | 8.861    | 10.301   | 10.296    | 10.261    | 11.024    | 10.854    | 10.804    | 10.891    |
| Pa [4] alone | 17    | 39  | SGSGSGVLDGYPQPTTFKPPNDYW   | 9.59      | 2      | 17    | 5.77   | 5.988  | 5.848  | 6.512   | 6.682   | 6.731   | 7.205   | 7.174   | 7.257   | 8.261    | 8.425    | 8.368    | 9.565     | 9.615     | 9.589     | 10.343    | 10.218    | 10.202    |
| Pa [4] alone | 24    | 37  | DGYPQPTTFKPPND             | 6.11      | 2      | 8     | 2.454  | 2.553  | 2.539  | 2.774   | 2.781   | 2.821   | 3.348   | 3.326   | 3.352   | 4.424    | 4.469    | 4.507    | 5.686     | 5.709     | 5.699     | 6.338     | 6.335     | 6.314     |
| Pa [4] alone | 24    | 39  | DGYPQPTTFKPPNDYW           | 9.15      | 2      | 10    | 2.44   | 2.286  | 2.415  | 2.652   | 2.588   | 2.69    | 3.346   | 3.315   | 3.216   | 4.27     | 4.291    | 4.278    | 5.332     | 5.369     | 5.368     | 6.068     | 6         | 5.935     |
| Pa [4] alone | 38    | 41  | YWLL                       | 11.07     | 1      | 2     | 0.017  | 0.015  | 0.021  | 0.025   | 0.015   | 0.01    | 0.007   | 0.005   | 0.002   | 0.011    | 0.003    | 0.005    | 0.004     | 0.002     | 0.002     | 0.003     | 0.01      | 0.004     |
| Pa [4] alone | 40    | 51  | LUSNTNGVVY                 | 7.62      | 1      | 10    | 3.394  | 3.572  | 3.467  | 3.964   | 3.783   | 3.874   | 3.84    | 3.852   | 3.839   | 4.045    | 4.033    | 4.049    | 4.572     | 4.575     | 4.594     | 5.088     | 5.069     | 5.053     |
| Pa [4] alone | 40    | 59  | LUSNTNGVVYESTNNDF          | 8.16      | 2      | 18    | 3.422  | 3.745  | 3.694  | 3.974   | 4.014   | 4.081   | 4.115   | 4.144   | 4.175   | 4.427    | 4.548    | 4.519    | 5.274     | 5.333     | 5.304     | 6.12      | 6.147     | 6.111     |
| Pa [4] alone | 41    | 51  | LSNTNGVVY                  | 6.14      | 1      | 9     | 3.39   | 3.581  | 3.435  | 3.765   | 3.845   | 3.838   | 3.938   | 3.909   | 3.987   | 3.962    | 4.098    | 4.41     | 4.542     | 4.561     | 4.956     | 4.911     | 5         | 5.004     |
| Pa [4] alone | 42    | 51  | LSNTNGVVY                  | 5.31      | 2      | 8     | 3.38   | 3.54   | 3.455  | 3.665   | 3.704   | 3.793   | 3.832   | 3.762   | 3.808   | 3.94     | 3.976    | 3.998    | 4.373     | 4.359     | 4.368     | 4.483     | 4.426     | 4.459     |
| Pa [4] alone | 42    | 59  | LSNTNGVVYESTNNDF           | 6.8       | 2      | 16    | 3.58   | 3.79   | 3.735  | 3.975   | 4.058   | 4.093   | 4.154   | 4.167   | 4.159   | 4.497    | 4.566    | 4.551    | 5.256     | 5.254     | 5.346     | 5.836     | 5.831     | 5.813     |
| Pa [4] alone | 49    | 59  | VVYESTNNDF                 | 6.04      | 1      | 9     | 0.299  | 0.281  | 0.247  | 0.34    | 0.272   | 0.278   | 0.418   | 0.4     | 0.297   | 0.691    | 0.683    | 0.695    | 1.169     | 1.269     | 1.185     | 1.717     | 1.551     | 1.686     |
| Pa [4] alone | 52    | 59  | ESTNNDF                    | 4.25      | 1      | 6     | 0.175  | 0.198  | 0.186  | 0.232   | 0.229   | 0.202   | 0.296   | 0.287   | 0.299   | 0.607    | 0.667    | 0.594    | 1.14      | 1.121     | 1.119     | 1.626     | 1.595     | 1.579     |
| Pa [4] alone | 59    | 63  | FWTAV                      | 8.09      | 1      | 3     | 0.035  | 0.039  | 0.034  | 0.074   | 0.028   | 0.019   | 0.051   | 0.042   | 0.022   | 0.049    | 0.029    | 0.028    | 0.044     | 0.028     | 0.036     | 0.043     | 0.045     | 0.038     |
| Pa [4] alone | 59    | 64  | FWTAVI                     | 9.72      | 1      | 4     | -0.019 | -0.006 | 0.09   | 0.018   | -0.049  | -0.059  | -0.056  | -0.063  | -0.047  | -0.064   | -0.062   | -0.061   | -0.051    | -0.075    | -0.093    | -0.033    | -0.065    | -0.06     |
| Pa [4] alone | 60    | 63  | WTAV                       | 5.53      | 1      | 2     | 0.033  | 0.031  | 0.025  | 0.03    | 0.024   | 0.02    | 0.025   | 0.024   | 0.024   | 0.026    | 0.023    | 0.026    | 0.022     | 0.024     | 0.02      | 0.026     | 0.023     | 0.026     |
| Pa [4] alone | 60    | 64  | WTAVI                      | 7.79      | 1      | 3     | 0.032  | 0.031  | 0.028  | 0.035   | 0.022   | 0.032   | 0.029   | 0.023   | 0.023   | 0.024    | 0.018    | 0.025    | 0.021     | 0.028     | 0.023     | 0.023     | 0.021     | 0.027     |
| Pa [4] alone | 64    | 73  | IAPVPHVSQT                 | 4.06      | 2      | 7     | 1.478  | 1.541  | 1.502  | 1.927   | 1.965   | 1.982   | 2.282   | 2.272   | 2.289   | 2.439    | 2.452    | 2.454    | 2.918     | 2.902     | 2.91      | 3.361     | 3.367     | 3.366     |
| Pa [4] alone | 64    | 76  | IAPVPHVSNTRQ               | 3.61      | 2      | 10    | 2.73   | 2.828  | 2.766  | 3.501   | 3.571   | 3.557   | 4.081   | 4.05    | 4.065   | 4.356    | 4.381    | 4.378    | 5.248     | 5.257     | 5.221     | 5.904     | 5.827     | 5.859     |
| Pa [4] alone | 64    | 79  | IAPVPHVSNTRQYL             | 7.03      | 2      | 13    | 2.747  | 2.805  | 2.71   | 3.825   | 3.769   | 3.691   | 4.542   | 4.379   | 4.357   | 4.78     | 4.851    | 4.772    | 5.518     | 5.533     | 5.448     | 6.905     | 6.072     | 6.096     |
| Pa [4] alone | 65    | 73  | IAVPHVSQT                  | 3.14      | 2      | 6     | 1.458  | 1.539  | 1.523  | 1.93    | 1.978   | 2.003   | 2.299   | 2.352   | 2.283   | 2.446    | 2.491    | 2.48     | 2.974     | 2.972     | 2.973     | 3.407     | 3.46      | 3.416     |
| Pa [4] alone | 65    | 76  | IAVPHVSNTRQ                | 2.9       | 3      | 9     | 2.763  | 2.866  | 2.811  | 3.565   | 3.636   | 3.565   | 4.15    | 4.137   | 4.156   | 4.435    | 4.451    | 4.476    | 5.378     | 5.358     | 5.366     | 6.009     | 6.001     | 6.017     |
| Pa [4] alone | 74    | 79  | NRQYL                      | 6.43      | 2      | 4     | 0.738  | 0.67   | 0.682  | 1.342   | 1.325   | 1.295   | 1.77    | 1.701   | 1.771   | 1.8      | 1.757    | 1.776    | 1.854     | 1.847     | 1.832     | 1.813     | 1.851     | 1.862     |
| Pa [4] alone | 80    | 86  | FGENKQF                    | 5.15      | 2      | 5     | 1.273  | 1.343  | 1.295  | 1.44    | 1.447   | 1.437   | 1.452   | 1.419   | 1.429   | 1.45     | 1.46     | 1.458    | 1.626     | 1.615     | 1.601     | 2.05      | 2.034     | 2.028     |
| Pa [4] alone | 80    | 87  | FGENKQFVNNNSDKWKF          | 8.05      | 4      | 16    | 2.476  | 2.764  | 2.681  | 3       | 2.911   | 2.894   | 3.353   | 3.206   | 3.14    | 4.216    | 4.192    | 4.152    | 5.347     | 5.345     | 5.3       | 6.351     | 6.179     | 6.095     |
| Pa [4] alone | 84    | 97  | KQFVNNNSDKWKF              | 7.44      | 4      | 12    | 1.09   | 1.44   | 1.276  | 1.527   | 1.463   | 1.42    | 1.891   | 1.626   | 1.614   | 2.778    | 2.557    | 2.598    | 3.846     | 3.554     | 3.583     | 4.561     | 4.263     | 4.176     |
| Pa [4] alone | 98    | 100 | FEM                        | 6.19      | 1      | 1     | 0.034  | 0.031  | 0.03   | 0.03    | 0.025   | 0.027   | 0.019   | 0.028   | 0.025   | 0.023    | 0.027    | 0.021    | 0.017     | 0.022     | 0.023     | 0.026     | 0.025     | 0.025     |
| Pa [4] alone | 98    | 121 | FEMFKGSGQDFNSNRRLLTSSNRL   | 7.15      | 3      | 22    | 7.168  | 6.938  | 6.304  | 7.535   | 7.655   | 7.786   | 7.627   | 7.838   | 7.757   | 7.924    | 8.156    | 8.252    | 8.551     | 8.783     | 8.417     | 9.138     | 8.857     | 8.59      |
| Pa [4] alone | 98    | 123 | FEMFKGSGQDFNSNRRLLTSSNRLV  | 7.21      | 4      | 24    | 7.734  | 6.597  | 6.092  | 7.653   | 7.121   | 7.384   | 7.647   | 7.418   | 7.322   | 7.728    | 7.721    | 7.86     | 8.095     | 8.205     | 8.189     | 9.018     | 8.367     | 8.306     |
| Pa [4] alone | 101   | 109 | FKGSGQDF                   | 4.82      | 2      | 7     | 3.867  | 4.059  | 3.92   | 4.25    | 4.318   | 4.271   | 4.495   | 4.393   | 4.42    | 4.429    | 4.481    | 4.448    | 4.642     | 4.579     | 4.561     | 4.62      | 4.571     | 4.541     |
| Pa [4] alone | 101   | 121 | FKGSGQDFNSNRRLLTSSNRL      | 5.25      | 3      | 19    | 7.157  | 7.926  | 7.681  | 8.987   | 8.826   | 8.646   | 9.524   | 9.123   | 8.922   | 9.499    | 9.429    | 9.447    | 10.071    | 9.848     | 9.697     | 10.479    | 10.077    | 9.841     |
| Pa [4] alone | 101   | 123 | FKGSGQDFNSNRRLLTSSNRLV     | 5.42      | 4      | 21    | 7.872  | 7.594  | 7.203  | 8.443   | 8.418   | 8.204   | 9.034   | 8.691   | 8.582   | 9.13     | 9.033    | 8.981    | 9.772     | 9.417     | 9.404     | 10.331    | 9.836     | 9.6       |
| Pa [4] alone | 101   | 125 | FKGSGQDFNSNRRLLTSSNRLVGLM  | 7.73      | 4      | 23    | 6.949  | 7.361  | 7.29   | 7.702   | 7.905   | 7.908   | 8.671   | 8.338   | 8.333   | 8.19     | 8.387    | 8.411    | 8.579     | 8.609     | 8.656     | 9.224     | 9.417     | 9.034     |
| Pa [4] alone | 122   | 134 | VGMKLYGGRVWF               | 9.49      | 3      | 11    | 0.875  | 1.194  | 1.092  | 1.463   | 1.326   | 1.229   | 1.485   | 1.293   | 1.21    | 1.455    | 1.335    | 1.235    | 1.814     | 1.674     | 1.566     | 2.725     | 2.589     | 2.102     |
| Pa [4] alone | 122   | 143 | VGMKLYGGRVWFHGETPRATT      | 7.38      | 4      | 19    | 1.192  | 2.368  | 1.888  | 2.983   | 3.068   | 2.52    | 3.148   | 2.724   | 2.833   | 3.41     | 2.844    | 2.888    | 4.19      | 4.94      | 2.967     | 5.159     | 5.846     | 4.913     |
| Pa [4] alone | 122   | 147 | VGMKLYGGRVWFHGETPRATDSSN   | 7.33      | 4      | 23    | 2.516  | 2.719  | 2.79   | 3.203   | 2.795   | 2.931   | 3.746   | 3.256   | 3.07    | 3.764    | 3.599</  |          |           |           |           |           |           |           |

|                        |     |     |                                  |      |   |    |       |       |        |        |        |        |        |        |        |        |        |        |        |        |        |        |        |        |
|------------------------|-----|-----|----------------------------------|------|---|----|-------|-------|--------|--------|--------|--------|--------|--------|--------|--------|--------|--------|--------|--------|--------|--------|--------|--------|
| Pp [4] with Thimerosal | 64  | 73  | IAVEPHVSQT                       | 4.06 | 2 | 7  | 1.491 | 1.503 | 1.503  | 1.971  | 1.955  | 1.958  | 2.304  | 2.269  | 2.298  | 2.475  | 2.454  | 2.465  | 2.897  | 2.93   | 2.914  | 3.371  | 3.336  | 3.357  |
| Pp [4] with Thimerosal | 64  | 76  | IAVEPHVSTNRQ                     | 3.61 | 2 | 10 | 2.725 | 2.729 | 2.869  | 3.595  | 3.482  | 3.53   | 4.131  | 4.081  | 4.058  | 4.416  | 4.436  | 4.553  | 5.234  | 5.36   | 5.348  | 5.882  | 5.804  | 5.789  |
| Pp [4] with Thimerosal | 64  | 79  | IAVEPHVSQTNRQYL                  | 7.03 | 2 | 13 | 2.81  | 2.882 | 3.04   | 3.861  | 3.738  | 3.742  | 4.511  | 4.477  | 4.478  | 4.882  | 4.886  | 4.928  | 5.777  | 5.737  | 5.697  | 6.037  | 5.974  | 6.044  |
| Pp [4] with Thimerosal | 65  | 73  | IAVEPHVSQT                       | 3.14 | 2 | 6  | 1.522 | 1.466 | 1.531  | 2.054  | 1.946  | 2.013  | 2.326  | 2.294  | 2.298  | 2.504  | 2.463  | 2.508  | 2.927  | 2.922  | 2.96   | 3.439  | 3.368  | 3.391  |
| Pp [4] with Thimerosal | 65  | 76  | IAVEPHVSTNRQ                     | 2.9  | 3 | 9  | 2.772 | 2.755 | 2.848  | 3.624  | 3.582  | 3.623  | 4.197  | 4.174  | 4.174  | 4.515  | 4.514  | 4.522  | 4.947  | 5.343  | 5.469  | 6.013  | 5.948  | 5.902  |
| Pp [4] with Thimerosal | 74  | 79  | NRQYL                            | 6.43 | 2 | 4  | 0.7   | 0.738 | 0.715  | 1.269  | 1.282  | 1.306  | 1.789  | 1.791  | 1.77   | 1.816  | 1.834  | 1.786  | 1.844  | 1.911  | 1.871  | 1.874  | 1.809  | 1.865  |
| Pp [4] with Thimerosal | 80  | 86  | FGENKQF                          | 5.15 | 2 | 5  | 1.302 | 1.288 | 1.345  | 1.464  | 1.421  | 1.447  | 1.461  | 1.421  | 1.431  | 1.471  | 1.488  | 1.491  | 1.623  | 1.662  | 1.667  | 2.079  | 2.052  | 2.059  |
| Pp [4] with Thimerosal | 80  | 97  | FGENKQFVNNNSDKWKF                | 8.05 | 4 | 16 | 2.653 | 2.583 | 2.804  | 2.952  | 2.886  | 2.835  | 3.206  | 3.174  | 3.151  | 4.179  | 4.193  | 4.225  | 5.271  | 5.403  | 5.399  | 6.168  | 6.125  | 6.188  |
| Pp [4] with Thimerosal | 84  | 97  | KQFVNNNSDKWKF                    | 7.44 | 4 | 12 | 1.338 | 1.278 | 1.45   | 1.497  | 1.43   | 1.322  | 1.689  | 1.667  | 1.614  | 2.567  | 2.628  | 2.554  | 3.1    | 3.602  | 3.687  | 4.284  | 4.184  | 4.249  |
| Pp [4] with Thimerosal | 98  | 100 | FEM                              | 6.19 | 1 | 1  | 0.029 | 0.036 | 0.03   | 0.027  | 0.02   | 0.022  | 0.022  | 0.016  | 0.02   | 0.023  | 0.025  | 0.024  | 0.028  | 0.034  | 0.036  | 0.035  | 0.037  | 0.039  |
| Pp [4] with Thimerosal | 98  | 121 | FEMFKGSSQDGSNRRTLTSSNRL          | 7.15 | 3 | 22 | 6.414 | 6.41  | 7.052  | 7.397  | 7.427  | 8.053  | 7.925  | 7.672  | 7.797  | 8.466  | 8.643  | 8.485  | 9.053  | 9.426  | 9.286  | 9.834  | 9.833  | 10.147 |
| Pp [4] with Thimerosal | 98  | 123 | FEMFKGSSQDGSNRRTLTSSNRLVGL       | 7.21 | 4 | 24 | 6.408 | 6.878 | 7.559  | 7.459  | 7.23   | 7.288  | 7.819  | 7.496  | 7.745  | 8.271  | 8.125  | 8.13   | 8.868  | 9.528  | 9.609  | 9.577  | 10.332 |        |
| Pp [4] with Thimerosal | 101 | 109 | FKGSSQDGF                        | 4.82 | 2 | 7  | 3.901 | 3.81  | 3.925  | 4.3    | 4.192  | 4.254  | 4.426  | 4.363  | 4.415  | 4.476  | 4.479  | 4.472  | 4.51   | 4.573  | 4.562  | 4.514  | 4.43   | 4.478  |
| Pp [4] with Thimerosal | 101 | 121 | FKGSSQDGSNRRTLTSSNRL             | 5.25 | 3 | 19 | 7.681 | 7.655 | 8.171  | 8.799  | 8.653  | 8.679  | 9.224  | 8.998  | 9.025  | 9.689  | 9.681  | 10.024 | 10.061 | 10.7   | 10.66  | 11.265 | 11.017 | 11.362 |
| Pp [4] with Thimerosal | 101 | 123 | FKGSSQDGSNRRTLTSSNRLVGL          | 5.42 | 4 | 21 | 7.241 | 6.916 | 7.714  | 8.32   | 8.279  | 8.088  | 8.81   | 8.555  | 8.564  | 9.363  | 9.279  | 9.258  | 9.969  | 10.083 | 10.221 | 11.533 | 11.26  | 11.375 |
| Pp [4] with Thimerosal | 101 | 125 | FKGSSQDGSNRRTLTSSNRLVGLM         | 7.73 | 4 | 23 | 7.331 | 7.123 | 7.491  | 8.439  | 8.28   | 7.844  | 8.528  | 8.149  | 8.45   | 8.864  | 8.942  | 9.066  | 9.668  | 10.045 | 11.023 | 11.383 | 11.353 | 11.78  |
| Pp [4] with Thimerosal | 122 | 134 | VGLMKYGGRRVWF                    | 9.49 | 3 | 11 | 1.036 | 0.833 | 1.083  | 1.185  | 1.205  | 1.119  | 1.209  | 1.186  | 1.248  | 1.412  | 1.399  | 1.313  | 2.129  | 2.224  | 2.292  | 2.425  | 4.386  | 4.497  |
| Pp [4] with Thimerosal | 122 | 143 | VGLMKYGGRRVWFHGETPRATT           | 7.38 | 4 | 19 | 1.849 | 1.374 | 2.635  | 2.505  | 2.442  | 2.493  | 2.966  | 3.182  | 3.249  | 3.164  | 3.815  | 4.681  | 5.204  | 5.639  | 7.9    | 7.671  | 7.715  |        |
| Pp [4] with Thimerosal | 122 | 147 | VGLMKYGGRRVWFHGETPRATDSSN        | 7.33 | 4 | 23 | 2.766 | 2.197 | 2.561  | 3.503  | 2.753  | 2.931  | 3.39   | 3.29   | 3.675  | 4.384  | 4.546  | 4.42   | 4.326  | 8.037  | 7.372  | 10.175 | 9.856  | 10.15  |
| Pp [4] with Thimerosal | 122 | 153 | VGLMKYGGRRVWFHGETPRATDSSNTADLN   | 7.44 | 4 | 29 | 5.897 | 5.63  | 6.012  | 7.3    | 7.211  | 6.873  | 8.056  | 8.063  | 8.142  | 9.4    | 9.539  | 10.011 | 11.996 | 12.855 | 12.646 | 15.173 | 14.987 | 15.292 |
| Pp [4] with Thimerosal | 122 | 155 | VGLMKYGGRRVWFHGETPRATDSSNTADLNNS | 7.74 | 4 | 31 | 6.069 | 6.163 | 6.241  | 7.747  | 7.731  | 7.743  | 8.89   | 8.953  | 8.9    | 10.291 | 10.379 | 10.516 | 13.463 | 13.511 | 13.254 | 16.311 | 16.411 | 16.717 |
| Pp [4] with Thimerosal | 124 | 134 | MLKYGGRRVWF                      | 9.16 | 3 | 9  | 1.075 | 0.835 | 1.026  | 1.21   | 1.194  | 1.104  | 1.256  | 1.187  | 1.199  | 1.415  | 1.339  | 1.332  | 2.013  | 2.062  | 2.047  | 3.63   | 3.64   | 3.801  |
| Pp [4] with Thimerosal | 124 | 151 | MLKYGGRRVWFHGETPRATDSSNTADL      | 7.45 | 4 | 25 | 3.838 | 3.543 | 3.908  | 4.812  | 5.044  | 4.802  | 5.736  | 5.637  | 5.762  | 6.892  | 6.963  | 7.175  | 8.868  | 9.277  | 9.306  | 11.532 | 11.197 | 11.483 |
| Pp [4] with Thimerosal | 124 | 155 | MLKYGGRRVWFHGETPRATDSSNTADLNNS   | 7.41 | 4 | 29 | 6.12  | 6.146 | 6.254  | 7.665  | 7.618  | 7.562  | 8.93   | 8.897  | 8.698  | 10.188 | 10.494 | 10.344 | 13.348 | 13.503 | 13.552 | 16.207 | 15.879 | 16.275 |
| Pp [4] with Thimerosal | 125 | 134 | LYKGGRRVWF                       | 8.82 | 3 | 8  | 1.243 | 1.032 | 1.348  | 1.385  | 1.357  | 1.215  | 1.418  | 1.356  | 1.362  | 1.581  | 1.524  | 1.458  | 2.219  | 2.242  | 2.27   | 3.745  | 3.559  | 3.783  |
| Pp [4] with Thimerosal | 125 | 151 | LYKGGRRVWFHGETPRATDSSNTADL       | 7.14 | 4 | 24 | 4.349 | 4.276 | 4.601  | 5.527  | 5.434  | 5.174  | 6.278  | 6.259  | 6.279  | 7.615  | 7.705  | 7.689  | 9.552  | 9.878  | 10.078 | 12.467 | 12.052 | 12.844 |
| Pp [4] with Thimerosal | 125 | 155 | LYKGGRRVWFHGETPRATDSSNTADLNNS    | 6.68 | 4 | 26 | 6.26  | 6.244 | 5.995  | 7.371  | 7.318  | 7.23   | 8.402  | 8.275  | 8.375  | 9.932  | 9.878  | 10.18  | 12.34  | 12.516 | 12.692 | 15.16  | 14.694 | 15.192 |
| Pp [4] with Thimerosal | 125 | 155 | LYKGGRRVWFHGETPRATDSSNTADLNNS    | 7.12 | 4 | 28 | 6.376 | 6.737 | 6.627  | 8.284  | 8.148  | 8.209  | 9.447  | 9.227  | 9.249  | 10.934 | 10.972 | 11.095 | 13.514 | 13.754 | 13.828 | 16.276 | 16.211 | 16.342 |
| Pp [4] with Thimerosal | 126 | 155 | KYGGRRVWFHGETPRATDSSNTADLNNS     | 6.74 | 4 | 27 | 6.486 | 6.51  | 6.62   | 8.139  | 8.1    | 8.152  | 9.427  | 9.371  | 9.369  | 10.949 | 11.029 | 11.079 | 13.667 | 13.858 | 14.004 | 16.338 | 16.107 | 16.492 |
| Pp [4] with Thimerosal | 135 | 151 | HGETPRATDSSNTADL                 | 4.06 | 3 | 14 | 3.101 | 3.055 | 3.288  | 4.407  | 4.369  | 4.417  | 5.526  | 5.522  | 5.582  | 6.761  | 6.76   | 6.672  | 8.72   | 8.933  | 8.905  | 9.816  | 9.69   | 9.826  |
| Pp [4] with Thimerosal | 135 | 155 | HGETPRATDSSNTADLNNS              | 4.73 | 3 | 18 | 4.664 | 4.781 | 4.887  | 6.604  | 6.456  | 6.537  | 8.028  | 7.984  | 7.916  | 9.359  | 9.284  | 9.27   | 11.368 | 11.422 | 12.574 | 12.481 | 12.645 |        |
| Pp [4] with Thimerosal | 154 | 162 | SIHSEF                           | 8.38 | 2 | 7  | 0.138 | 0.139 | 0.157  | 0.237  | 0.225  | 0.211  | 0.514  | 0.516  | 0.506  | 1.132  | 1.126  | 1.142  | 1.701  | 1.74   | 1.759  | 2.469  | 2.46   | 2.488  |
| Pp [4] with Thimerosal | 156 | 161 | HIHSE                            | 3.75 | 2 | 4  | 0.111 | 0.119 | 0.142  | 0.208  | 0.188  | 0.206  | 0.446  | 0.43   | 0.45   | 0.941  | 0.916  | 0.943  | 1.28   | 1.355  | 1.346  | 1.664  | 1.618  | 1.618  |
| Pp [4] with Thimerosal | 156 | 162 | HIHSEF                           | 6.87 | 2 | 5  | 0.129 | 0.146 | 0.147  | 0.231  | 0.21   | 0.216  | 0.493  | 0.476  | 0.474  | 1.014  | 1.025  | 1.031  | 1.339  | 1.391  | 1.392  | 1.711  | 1.691  | 1.71   |
| Pp [4] with Thimerosal | 157 | 162 | HIHSE                            | 5.54 | 2 | 4  | 0.107 | 0.122 | 0.163  | 0.204  | 0.173  | 0.189  | 0.458  | 0.439  | 0.453  | 0.935  | 0.935  | 0.976  | 1.2    | 1.267  | 1.26   | 1.438  | 1.407  | 1.388  |
| Pp [4] with Thimerosal | 158 | 162 | HSSEF                            | 6.86 | 1 | 3  | 0.233 | 0.19  | 0.182  | 0.255  | 0.258  | 0.264  | 0.494  | 0.51   | 0.499  | 1.033  | 1.008  | 1.019  | 1.24   | 1.25   | 1.239  | 1.525  | 1.424  | 1.464  |
| Pp [4] with Thimerosal | 163 | 170 | YIPRSQE                          | 4.77 | 2 | 5  | 2.298 | 2.262 | 2.386  | 2.643  | 2.614  | 2.626  | 2.936  | 2.891  | 2.931  | 3.284  | 3.286  | 3.31   | 3.385  | 3.426  | 3.432  | 3.391  | 3.39   | 3.383  |
| Pp [4] with Thimerosal | 163 | 173 | YIPRSQESKC                       | 4.58 | 2 | 8  | 3.561 | 3.645 | 4.026  | 4.342  | 4.25   | 4.21   | 4.486  | 4.629  | 4.485  | 4.809  | 4.809  | 4.857  | 4.806  | 4.975  | 4.978  | 4.851  | 4.821  | 4.855  |
| Pp [4] with Thimerosal | 163 | 175 | YIPRSQESKCN                      | 4.53 | 3 | 10 | 4.007 | 4.079 | 4.358  | 5.096  | 5.01   | 5.043  | 5.526  | 5.509  | 5.551  | 5.917  | 5.939  | 6      | 5.996  | 6.189  | 6.188  | 6      | 5.911  | 5.931  |
| Pp [4] with Thimerosal | 174 | 181 | NEVINYL                          | 6.28 | 2 | 6  | 0.541 | 0.601 | 0.84   | 1.382  | 1.351  | 1.16   | 2.252  | 2.271  | 2.289  | 3.77   | 3.813  | 3.661  | 4.346  | 4.34   | 4.246  | 4.388  | 4.425  | 4.558  |
| Pp [4] with Thimerosal | 176 | 181 | YINYL                            | 5.26 | 2 | 4  | 0.349 | 0.435 | 0.464  | 0.987  | 1.092  | 1.104  | 1.74   | 1.77   | 1.824  | 2.653  | 2.69   | 2.675  | 2.968  | 3.012  | 2.961  | 2.955  | 2.966  | 2.982  |
| Pp [4] with Thimerosal | 1   | 6   | MCQYKA                           | 4.94 | 2 | 4  | 2.315 | 3.126 | 3.149  | 3.186  | 3.205  | 3.266  | 3.137  | 3.114  | 3.12   | 3.247  | 3.262  | 3.27   | 3.25   | 3.243  | 3.239  | 3.263  | 3.295  | 3.244  |
| Pp [4] with Thimerosal | 1   | 10  | MCQYKANSKF                       | 5.85 | 3 | 8  | 5.807 | 5.677 | 5.902  | 5.905  | 5.754  | 5.85   | 5.84   | 5.733  | 5.717  | 5.979  | 5.939  | 5.906  | 6.021  | 5.97   | 5.963  | 5.922  | 5.916  | 5.818  |
| Pp [4] with Thimerosal | 1   | 12  | MCQYKANSKFIG                     | 6.37 | 3 | 10 | 7.146 | 7.043 | 7.228  | 7.128  | 7.114  | 7.18   | 7.119  | 7.091  | 7.033  | 7.179  | 7.308  | 7.302  | 7.394  | 7.312  | 7.389  | 7.326  | 7.343  | 7.297  |
| Pp [4] with Thimerosal | 3   | 10  | YIKANSKF                         | 4.31 | 3 | 6  | 4.361 | 4.296 | 4.411  | 4.385  | 4.296  | 4.366  | 4.318  | 4.266  | 4.245  | 4.417  | 4.399  | 4.387  | 4.453  | 4.439  | 4.468  | 4.388  | 4.299  |        |
| Pp [4] with Thimerosal | 11  | 14  | IGIT                             | 3.88 | 1 | 2  | 1.79  | 1.847 | 1.836  | 1.988  | 1.966  | 1.991  | 1.976  | 1.946  | 1.953  | 2.017  | 2.007  | 2.029  | 2.079  | 2.041  | 2.057  | 2.051  | 2.098  | 2.079  |
| Pp [4] with Thimerosal | 11  | 16  | IGITEL                           | 7.56 | 1 | 4  | 3.581 | 3.524 | 3.633  | 3.584  | 3.566  | 3.552  | 3.514  | 3.518  | 3.486  | 3.563  | 3.576  | 3.57   | 3.614  | 3.579  | 3.614  | 3.556  | 3.572  | 3.554  |
| Pp [4] with Thimerosal | 11  | 23  | IGITELSSGSGVL                    | 8.57 | 2 | 11 | 7.672 | 7.588 | 7.765  | 7.759  | 7.35   | 7.529  | 7.456  | 7.723  | 7.611  | 8.015  | 7.829  | 7.942  | 8.191  | 8.204  | 8.243  | 8.521  | 8.492  | 8.506  |
| Pp [4] with Thimerosal | 11  | 37  | IGITELSSGSGVLDGPYQPTTFKPPND      | 8.81 | 2 | 21 | 9.954 | 9.898 | 10.134 | 10.469 | 10.263 | 10.723 | 10.631 | 10.581 | 11.633 | 11.155 | 11.528 | 12.895 | 12.805 | 12.822 | 14.026 | 13.942 | 13.833 |        |
| Pp [4] with Thimerosal | 13  | 16  | ITEL                             | 4.88 | 1 | 2  | 1.83  | 1.689 | 1.826  | 1.745  | 1.769  | 1.933  | 1.898  | 1.844  | 1.82   | 1.786  | 1.901  | 1.815  | 1.825  | 1.818  | 1.87   | 1.777  | 1.78   | 1.82   |

|                   |     |     |               |      |   |    |       |       |       |       |       |       |       |       |       |       |       |       |       |       |       |       |       |       |
|-------------------|-----|-----|---------------|------|---|----|-------|-------|-------|-------|-------|-------|-------|-------|-------|-------|-------|-------|-------|-------|-------|-------|-------|-------|
| Pp P[4] with 13A1 | 156 | 162 | IIHSEF        | 6.87 | 2 | 5  | 0.115 | 0.12  | 0.118 | 0.176 | 0.178 | 0.174 | 0.35  | 0.331 | 0.344 | 0.619 | 0.608 | 0.611 | 0.886 | 0.852 | 0.859 | 1.272 | 1.25  | 1.187 |
| Pp P[4] with 13A1 | 157 | 162 | IIHSEF        | 5.54 | 2 | 4  | 0.082 | 0.072 | 0.14  | 0.138 | 0.143 | 0.133 | 0.27  | 0.235 | 0.228 | 0.444 | 0.428 | 0.449 | 0.655 | 0.663 | 0.632 | 0.982 | 1.001 | 0.885 |
| Pp P[4] with 13A1 | 158 | 162 | IIHSEF        | 6.86 | 1 | 3  | 0.173 | 0.485 | 0.358 | 0.262 | 0.414 | 0.394 | 0.476 | 0.513 | 0.719 | 0.876 | 0.787 | 0.839 | 1.012 | 1.039 | 1.083 | 1.276 | 1.276 | 1.257 |
| Pp P[4] with 13A1 | 163 | 170 | YIIPRSQE      | 4.77 | 2 | 5  | 1.189 | 1.225 | 1.289 | 1.446 | 1.456 | 1.426 | 1.944 | 1.902 | 1.907 | 2.618 | 2.633 | 2.622 | 3.034 | 3.065 | 3.026 | 3.41  | 3.438 | 3.389 |
| Pp P[4] with 13A1 | 163 | 173 | YIIPRSQESKC   | 4.58 | 2 | 8  | 1.987 | 1.942 | 2.037 | 2.509 | 2.436 | 2.5   | 3.012 | 3.153 | 3.124 | 3.849 | 3.756 | 3.781 | 4.484 | 4.444 | 4.439 | 5.023 | 4.769 | 4.801 |
| Pp P[4] with 13A1 | 163 | 175 | YIIPRSQESKCNE | 4.53 | 3 | 10 | 1.672 | 1.681 | 1.743 | 2.134 | 2.036 | 2.096 | 2.79  | 2.681 | 2.684 | 3.65  | 3.599 | 3.61  | 4.623 | 4.536 | 4.501 | 5.303 | 5.257 | 5.104 |
| Pp P[4] with 13A1 | 174 | 181 | NEYINNGL      | 6.28 | 2 | 6  | 0.392 | 0.375 | 0.466 | 0.546 | 0.438 | 0.512 | 0.777 | 0.636 | 0.757 | 1.094 | 1.005 | 0.978 | 1.218 | 1.237 | 1.207 | 1.329 | 1.205 | 1.38  |
| Pp P[4] with 13A1 | 176 | 181 | YINNGL        | 5.26 | 2 | 4  | 0.166 | 0.165 | 0.187 | 0.254 | 0.225 | 0.235 | 0.406 | 0.435 | 0.444 | 0.765 | 0.729 | 0.765 | 0.93  | 0.926 | 0.921 | 1.013 | 1.009 | 1.012 |

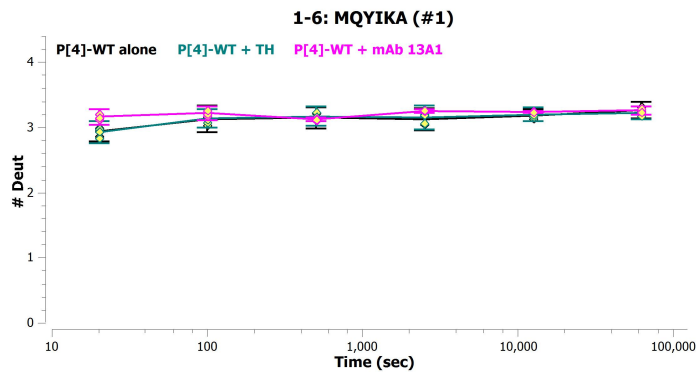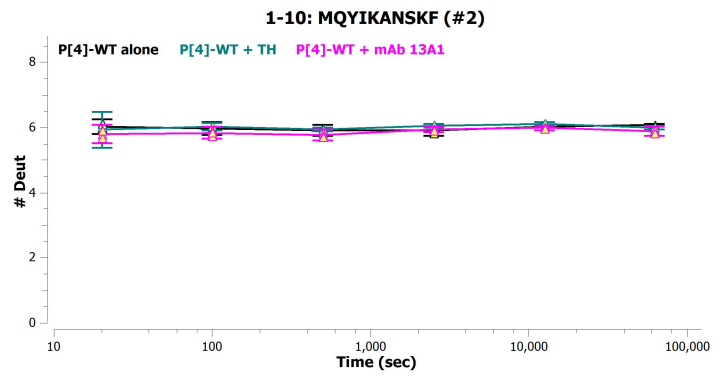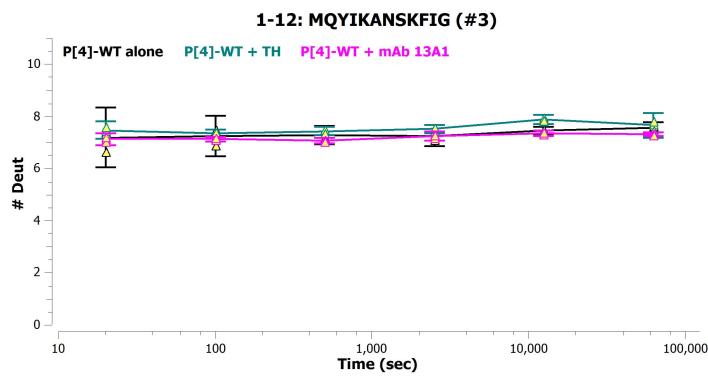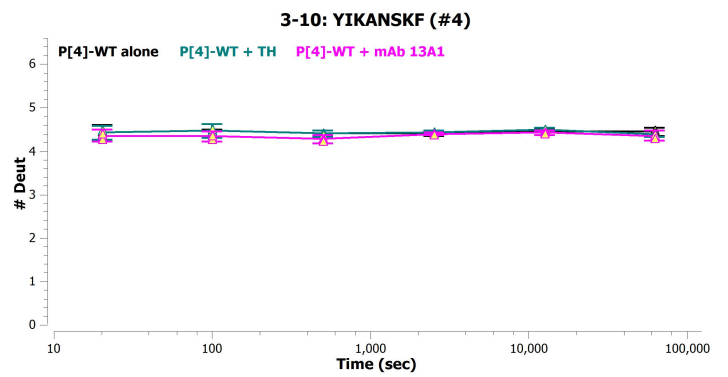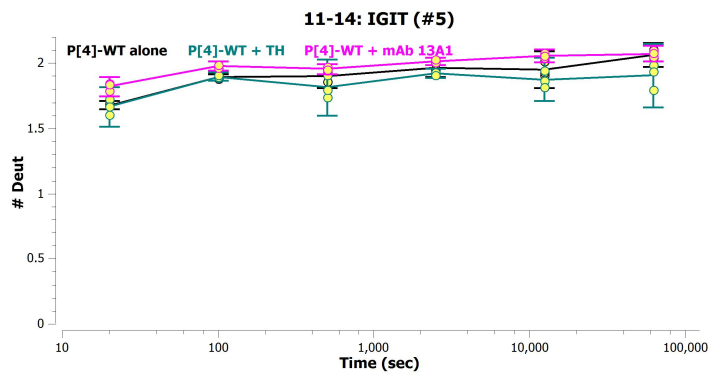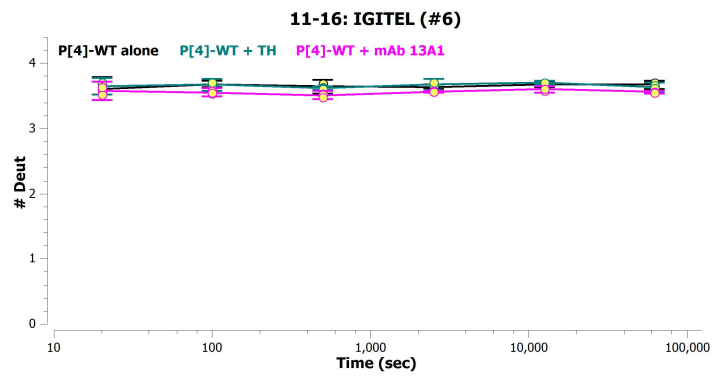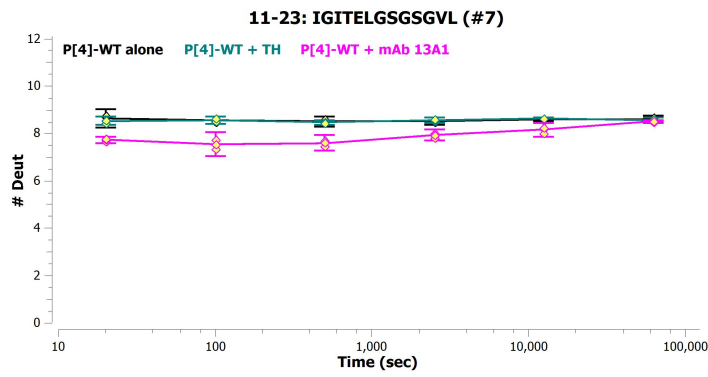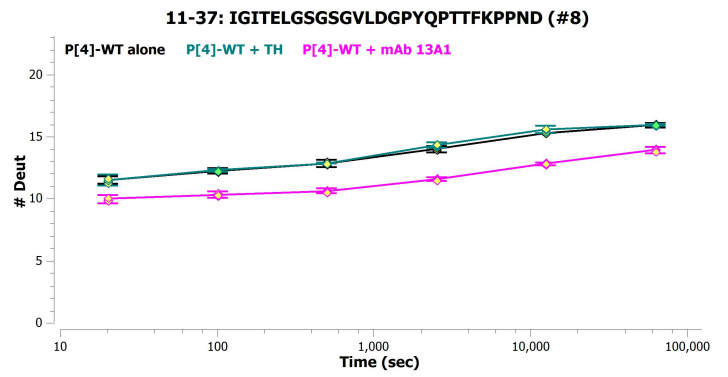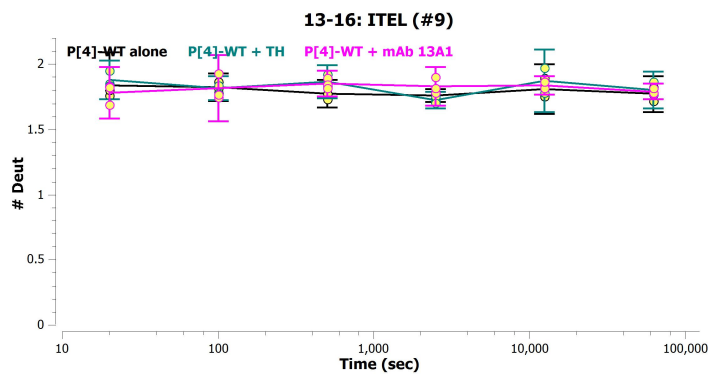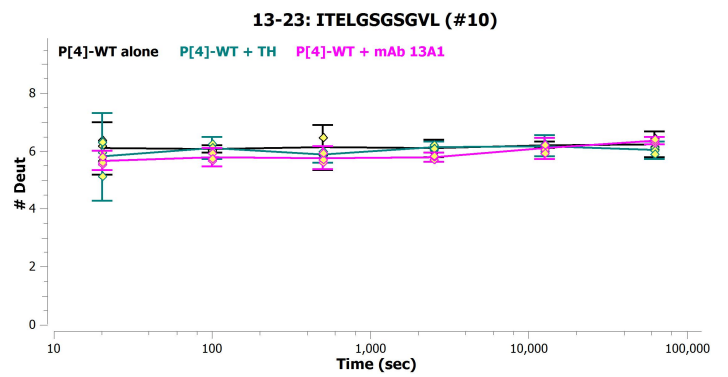

13-37: ITELGSGSGVLDGPYQPTTFKPPND (#11)

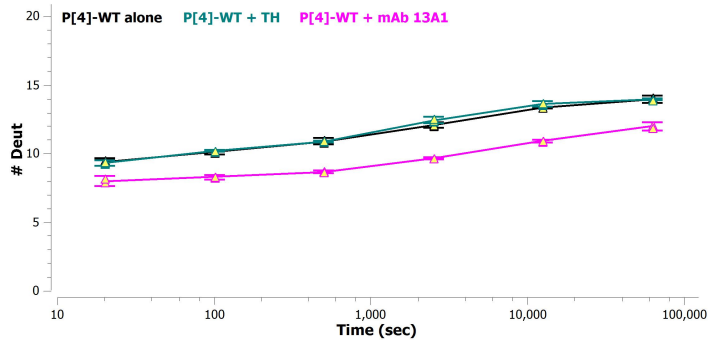

15-37: ELGSGSGVLDGPYQPTTFKPPND (#12)

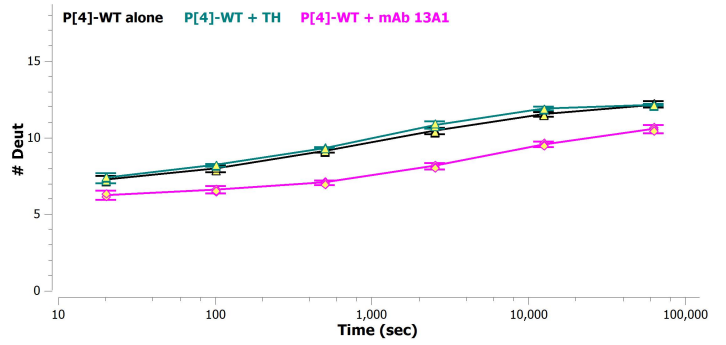

16-37: LGSGSGVLDGPYQPTTFKPPND (#13)

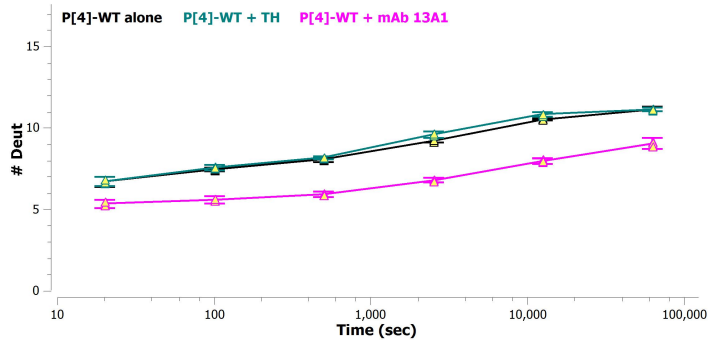

16-38: LGSGSGVLDGPYQPTTFKPPNDY (#14)

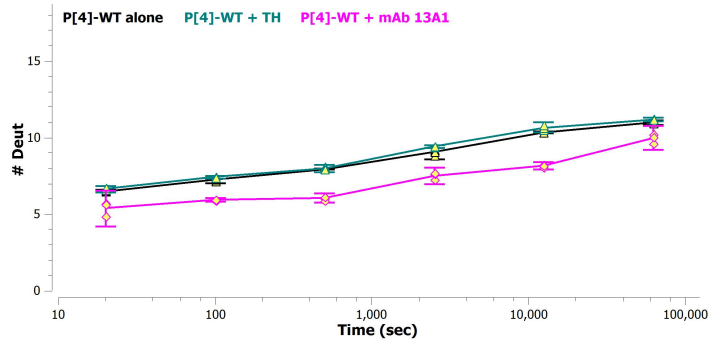

16-39: LGSGSGVLDGPYQPTTFKPPNDYW (#15)

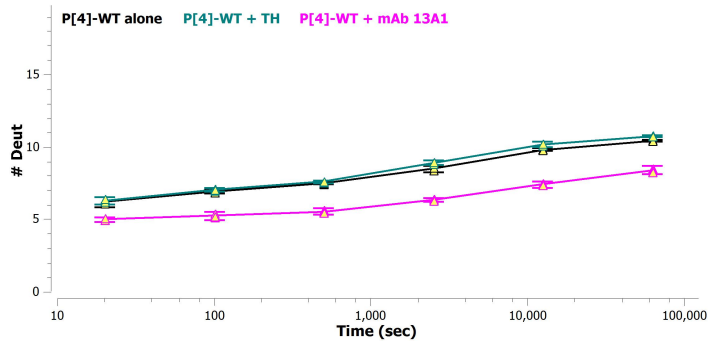

17-37: GSGSGVLDGPYQPTTFKPPND (#16)

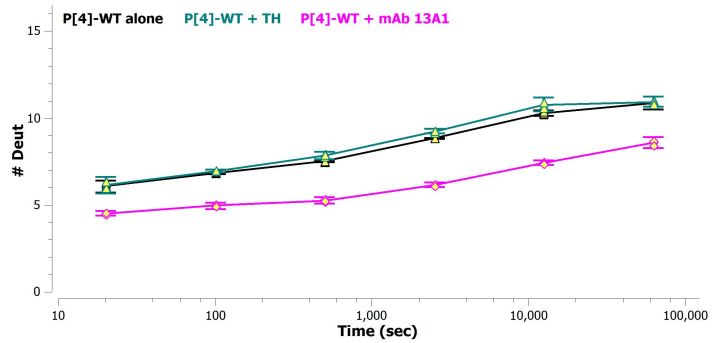

17-39: GSGSGVLDGPYQPTTFKPPNDYW (#17)

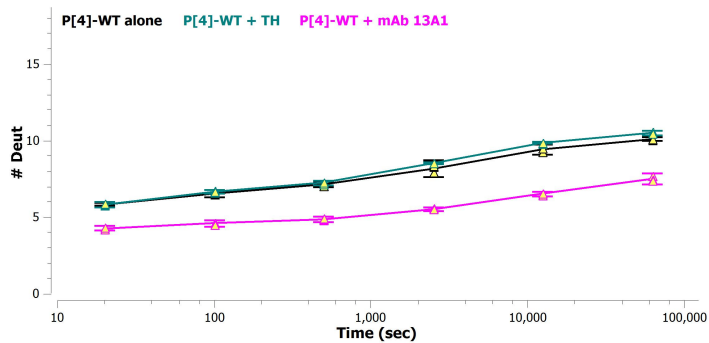

24-37: DGPYQPTTFKPPND (#18)

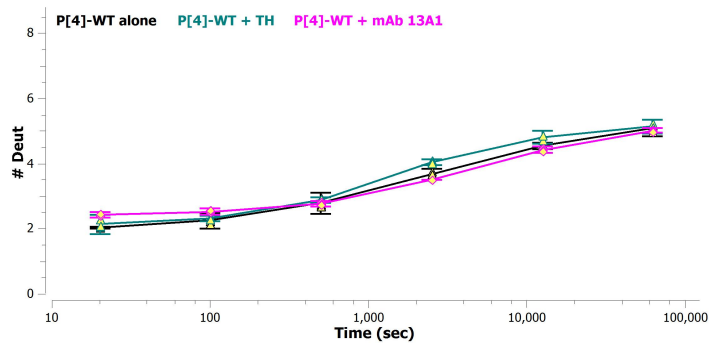

24-39: DGPYQPTTFKPPNDYW (#19)

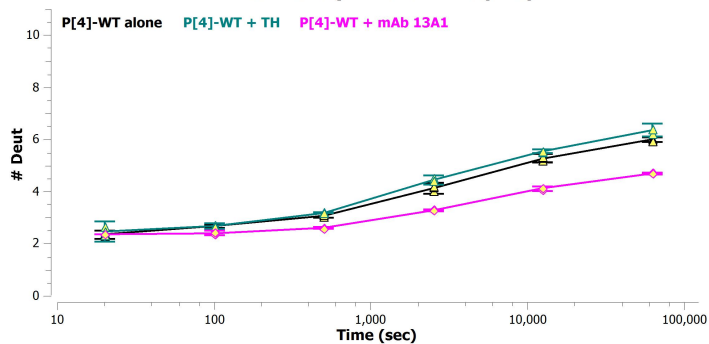

38-41: YWLL (#20)

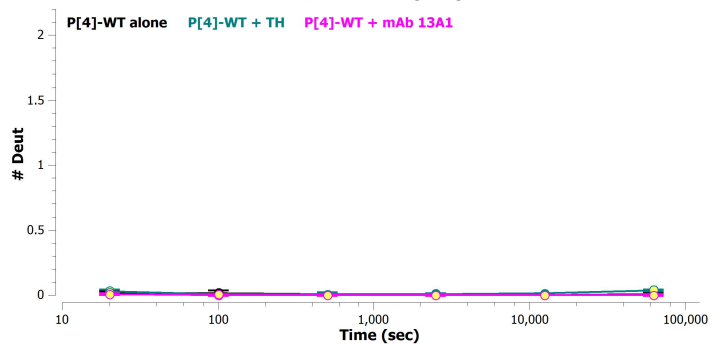

**40-51: LLISSNTNGVVY (#21)**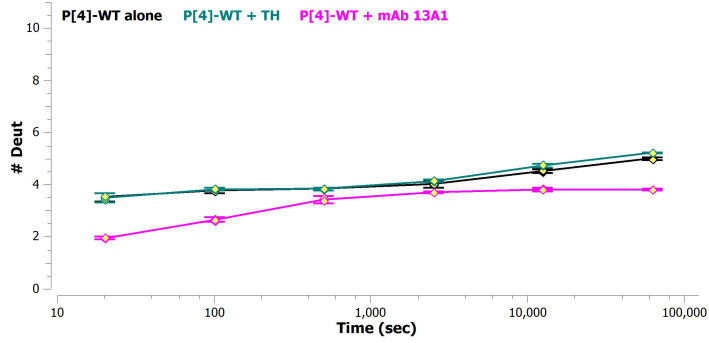**40-59: LLISSNTNGVVYESTNNDF (#22)**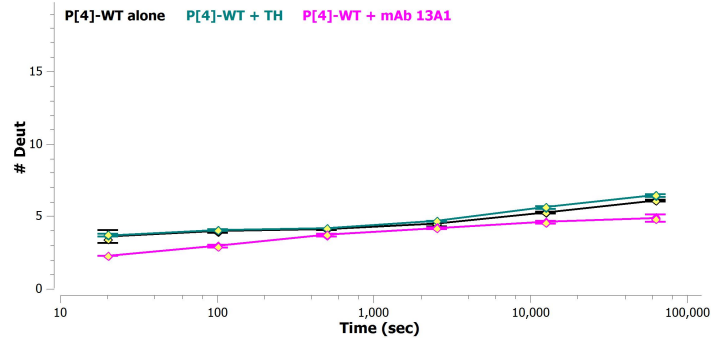**41-51: LISSNTNGVVY (#23)**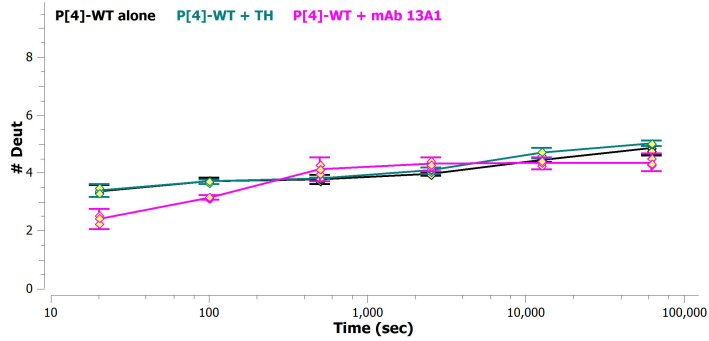**42-51: ISSNTNGVVY (#24)**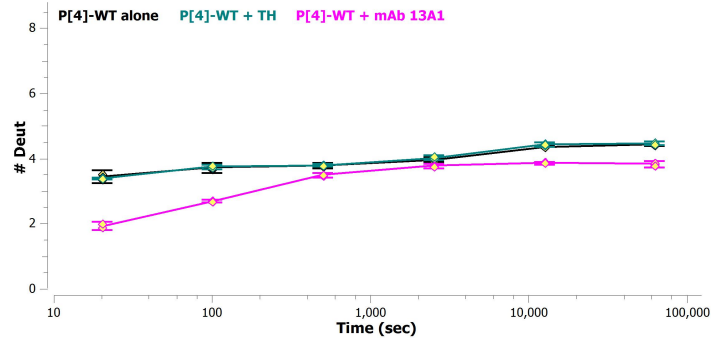**42-59: ISSNTNGVVYESTNNDF (#25)**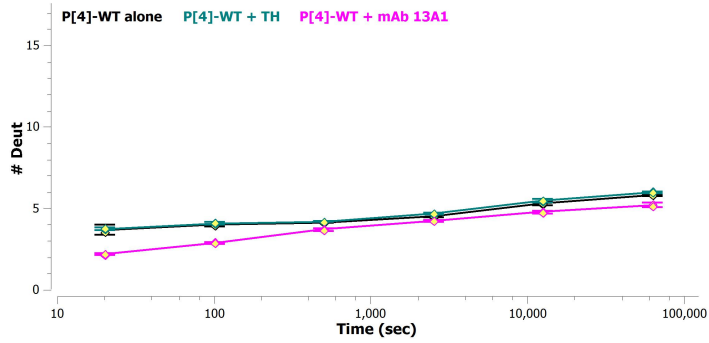**49-59: VVYESTNNDF (#26)**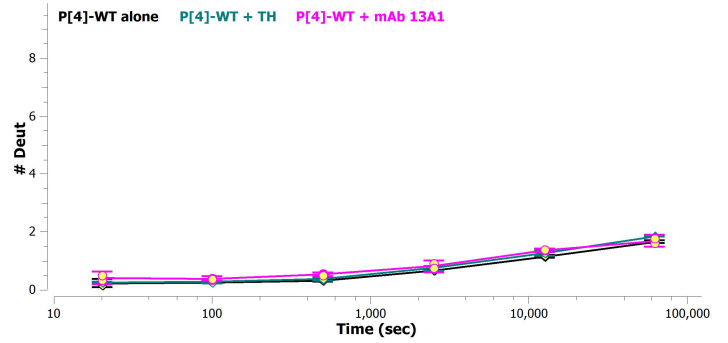**52-59: ESTNNDF (#27)**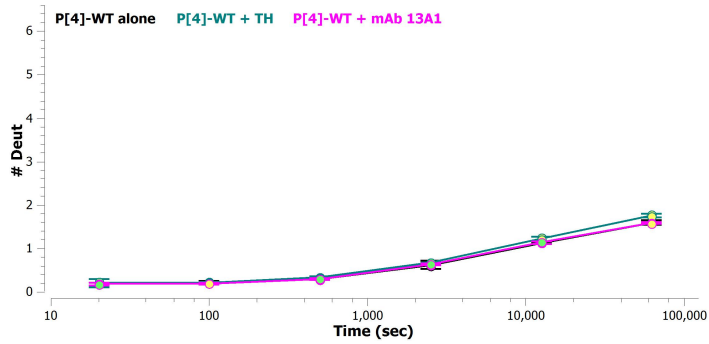**59-63: FWTAV (#28)**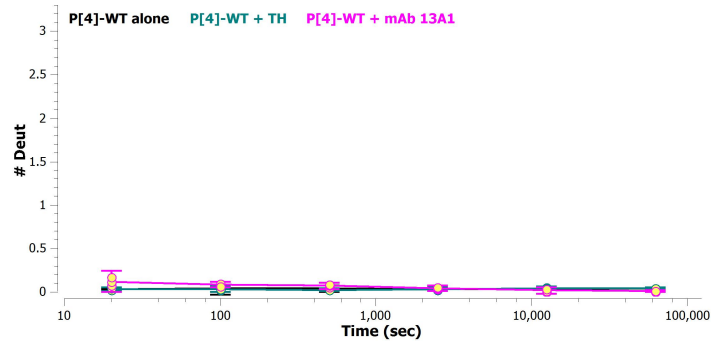**59-64: FWTAVI (#29)**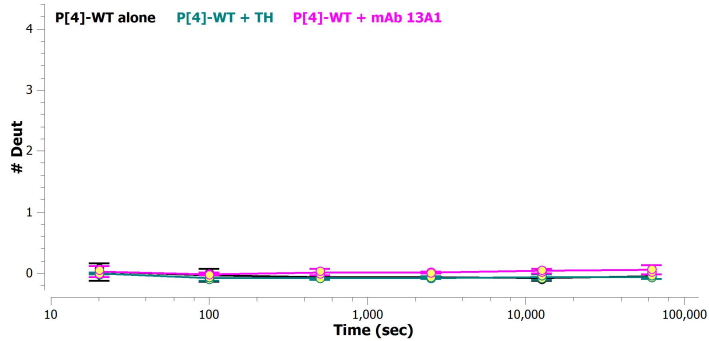**60-63: WTAV (#30)**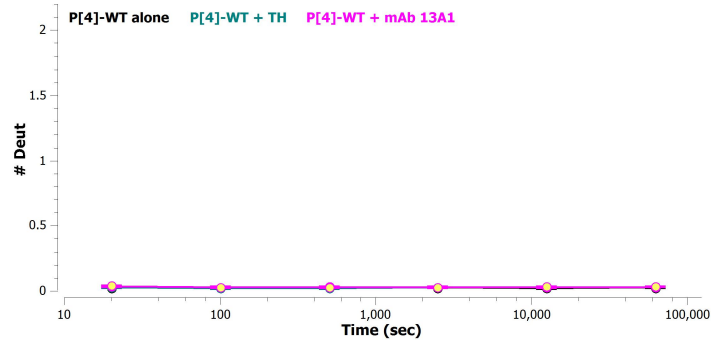

**60-64: WTAVI (#31)**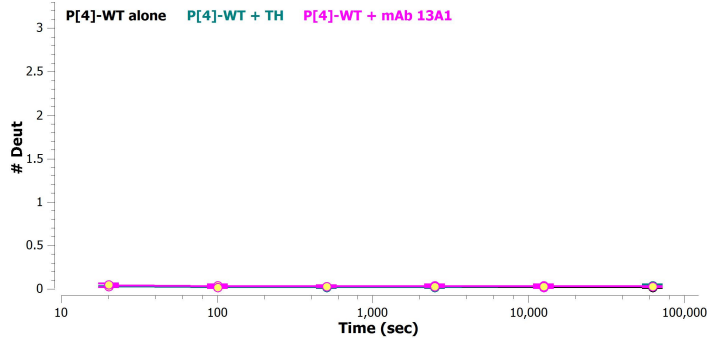**64-73: IAVEPHVSQT (#32)**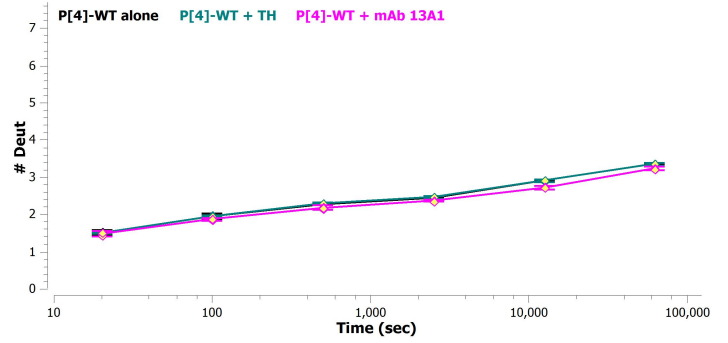**64-76: IAVEPHVSQTNRQ (#33)**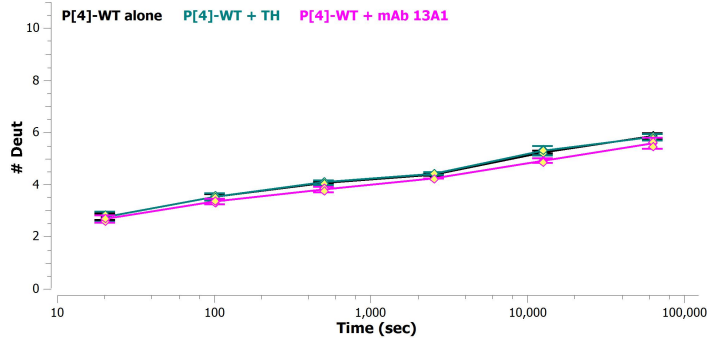**64-79: IAVEPHVSQTNRQYIL (#34)**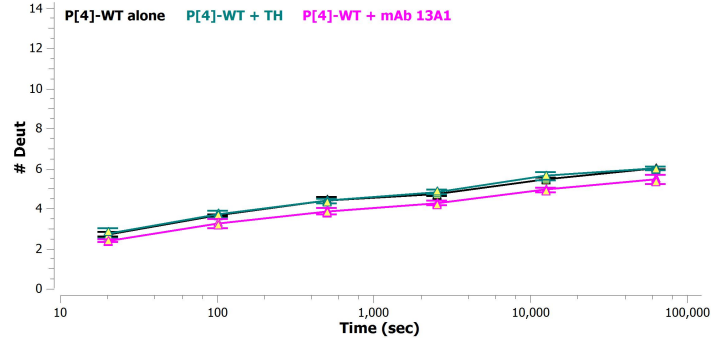**65-73: AVEPHVSQT (#35)**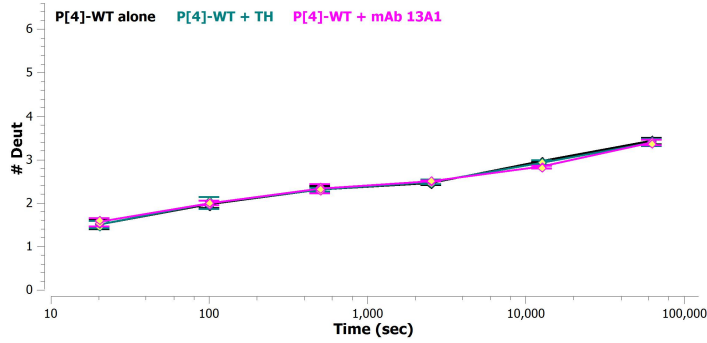**65-76: AVEPHVSQTNRQ (#36)**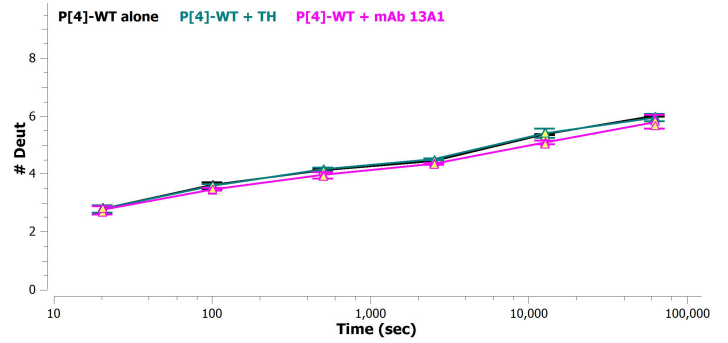**74-79: NRQYIL (#37)**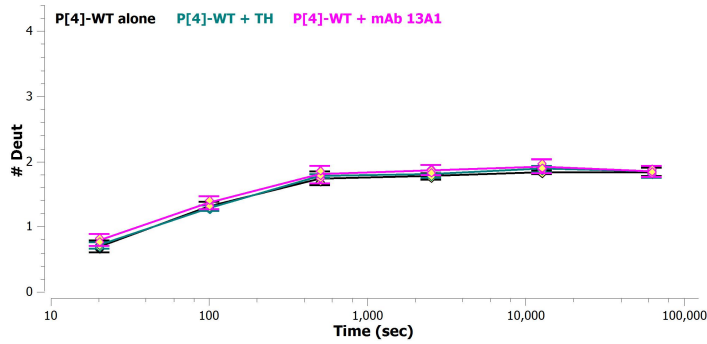**80-86: FGENKQF (#38)**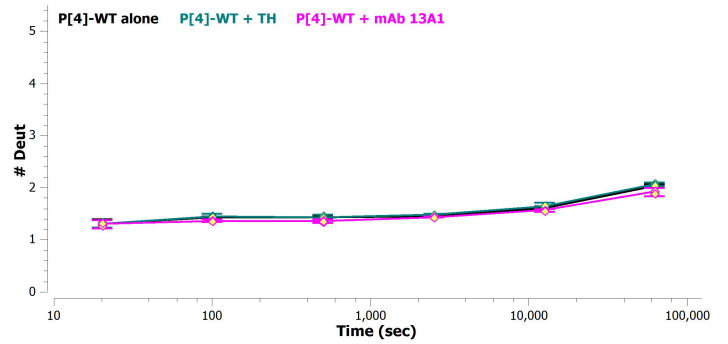**80-97: FGENKQFNVENNSDKWKWF (#39)**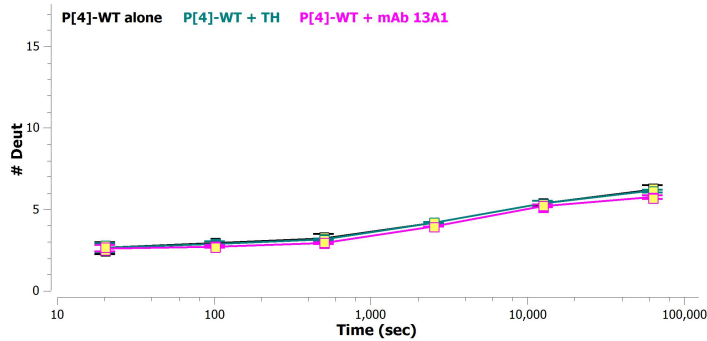**84-97: KQFNVENNSDKWKWF (#40)**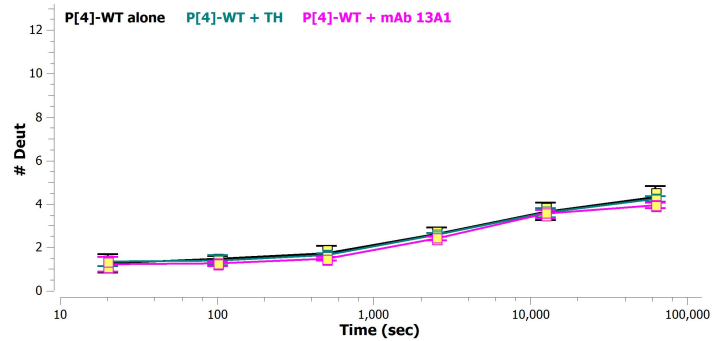

**98-100: FEM (#41)**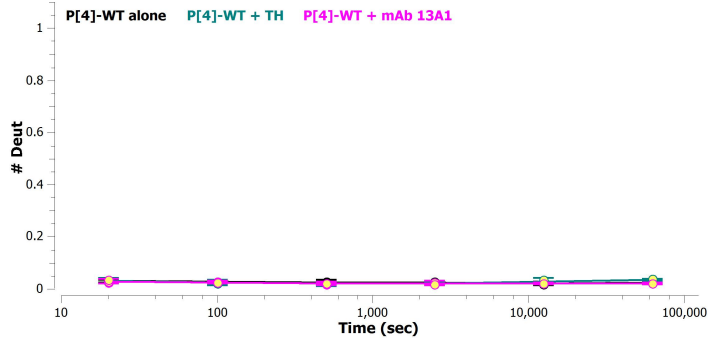**98-121: FEMFKGSSQGDFSNRRLTSSNRL (#42)**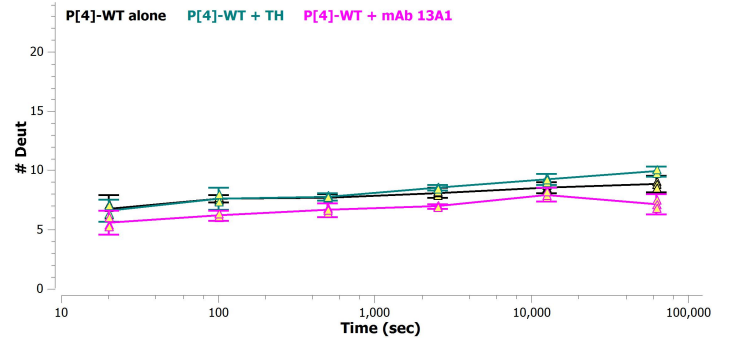**98-123: FEMFKGSSQGDFSNRRLTSSNRLVG (#43)**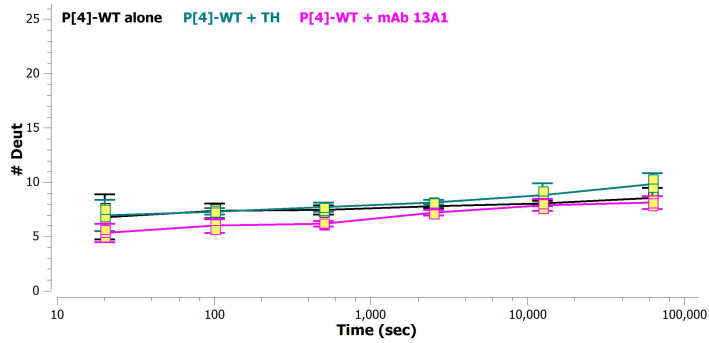**101-109: FKGSSQGDF (#44)**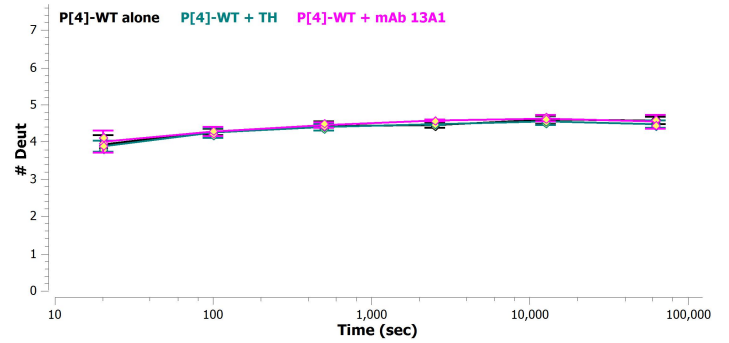**101-121: FKGSSQGDFSNRRLTSSNRL (#45)**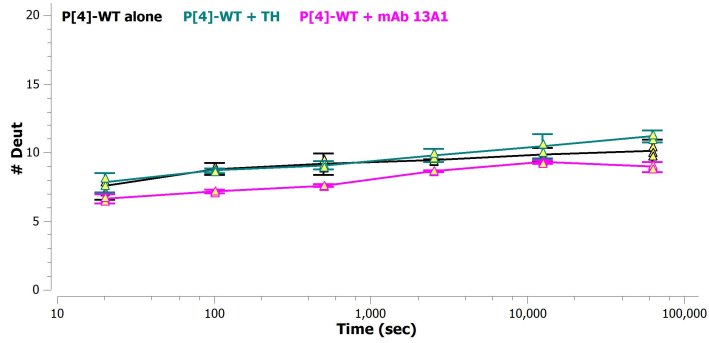**101-123: FKGSSQGDFSNRRLTSSNRLVG (#46)**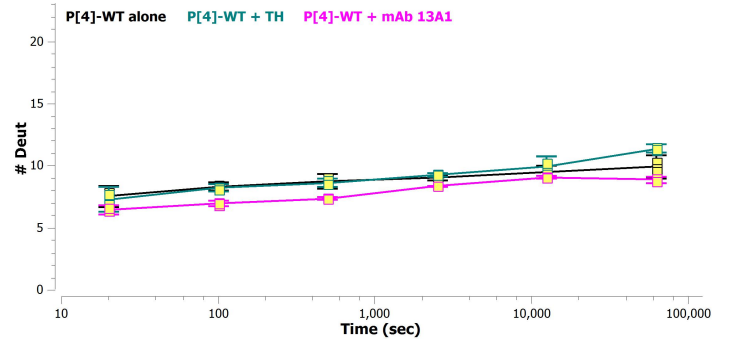**101-125: FKGSSQGDFSNRRLTSSNRLVGML (#47)**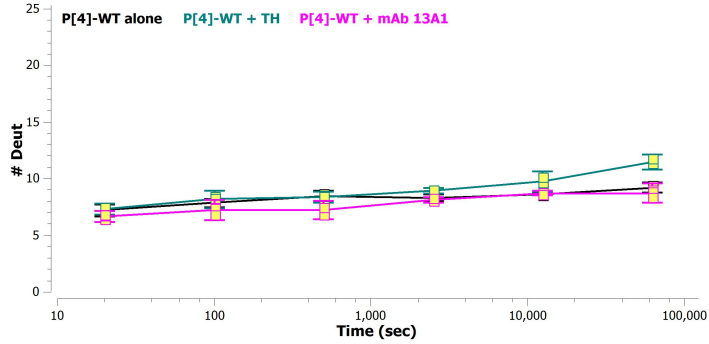**122-134: VGMLKYGGRVWTF (#48)**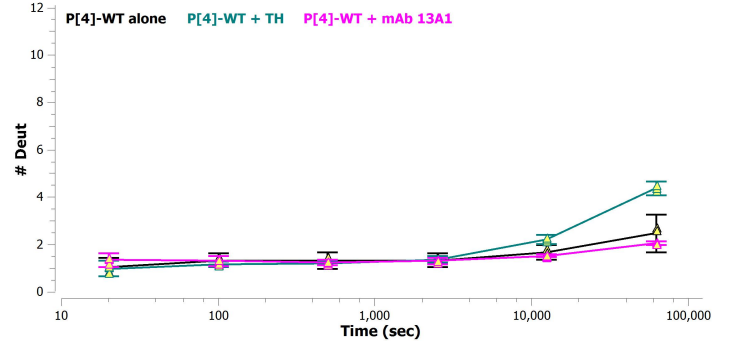**122-143: VGMLKYGGRVWTFHGETPRATT (#49)**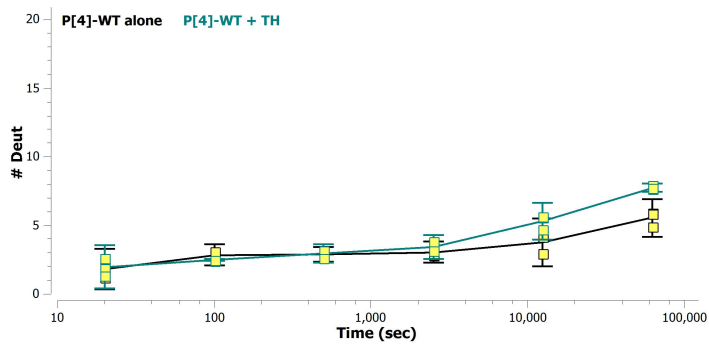**122-147: VGMLKYGGRVWTFHGETPRATTDSSN (#50)**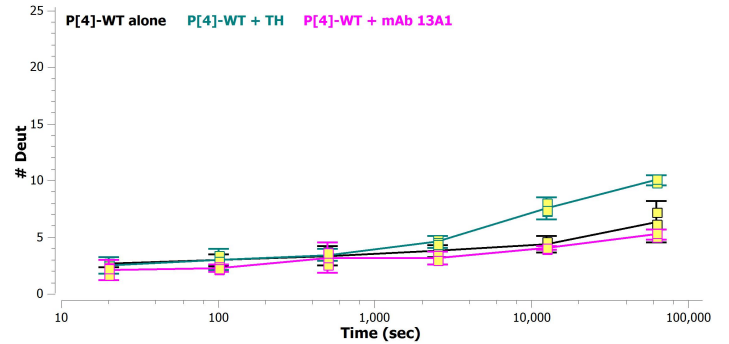





**135-151: HGETPRATTDSSNTADL (#61)**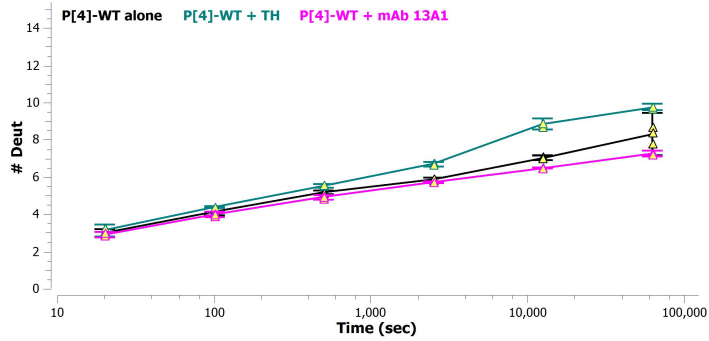**135-155: HGETPRATTDSSNTADLNNIS (#62)**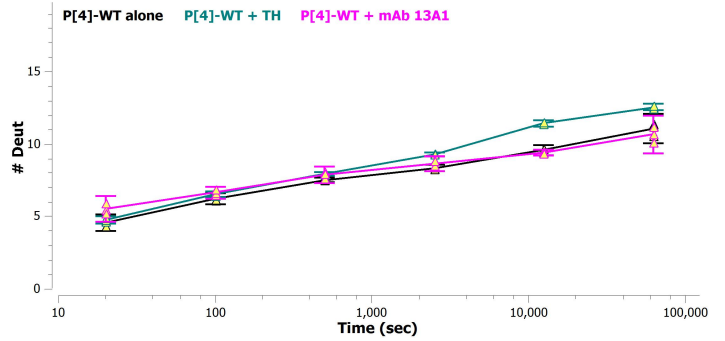**154-162: ISIIHSEF (#63)**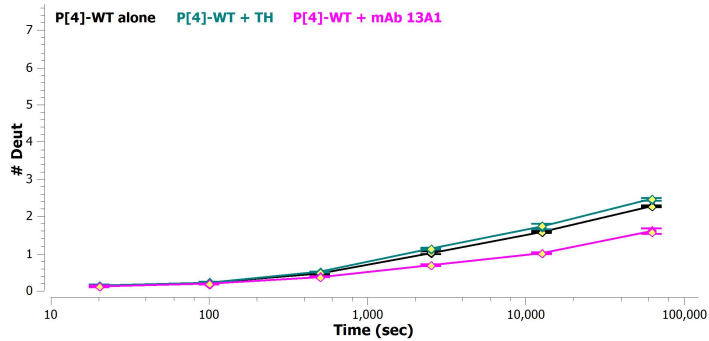**156-161: IIIHSE (#64)**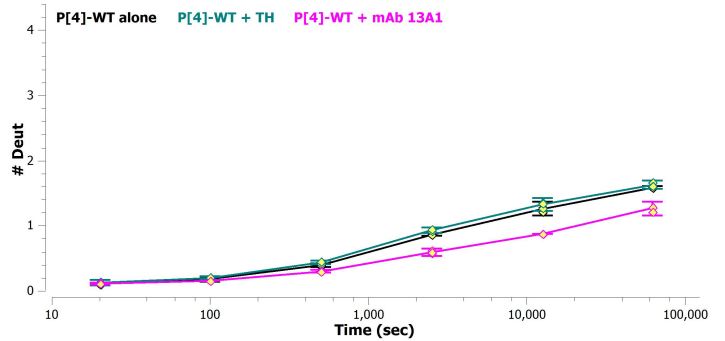**156-162: IIIHSEF (#65)**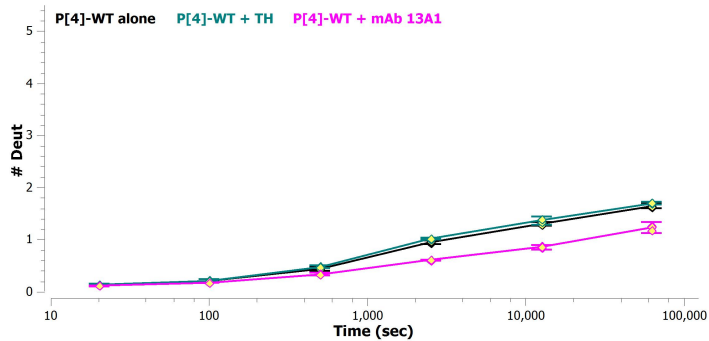**157-162: IIHSEF (#66)**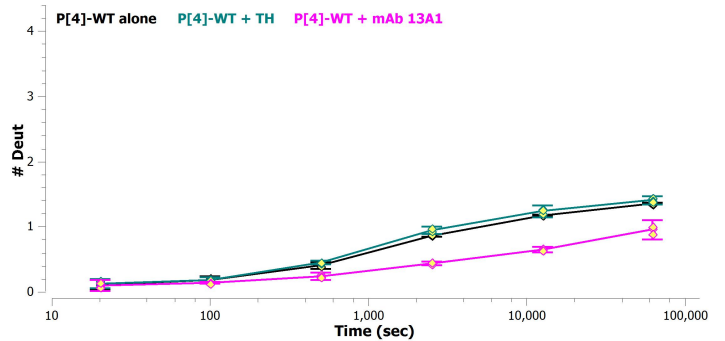**158-162: IHSEF (#67)**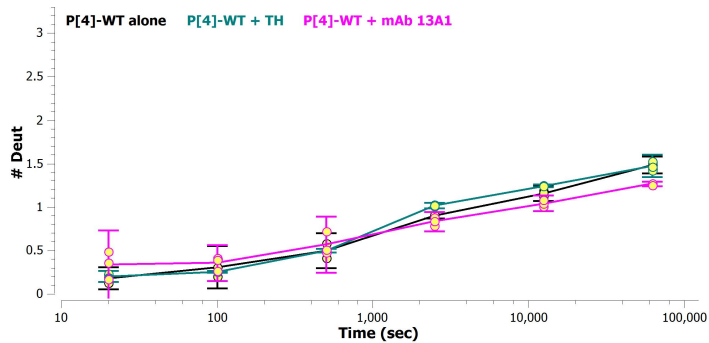**163-170: YIIPRSQE (#68)**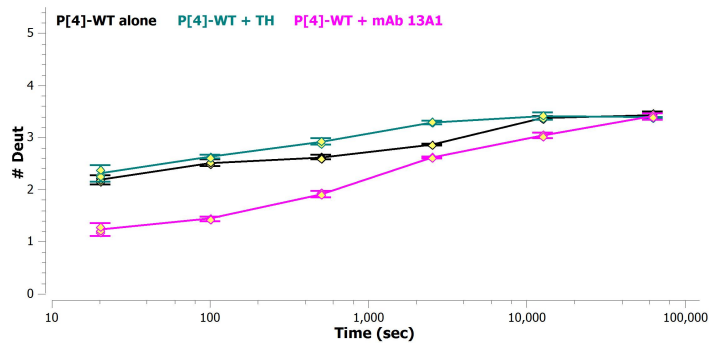**163-173: YIIPRSQESKC (#69)**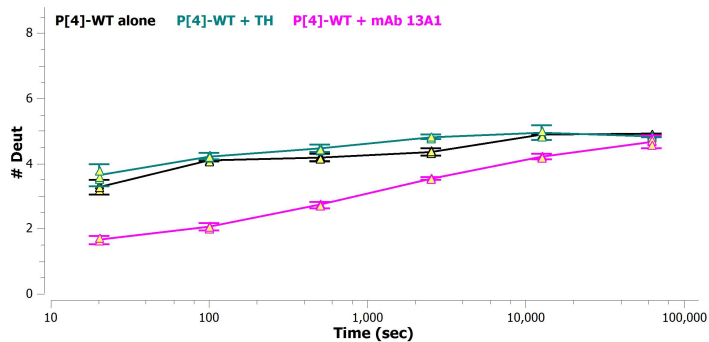**163-175: YIIPRSQESKCN (#70)**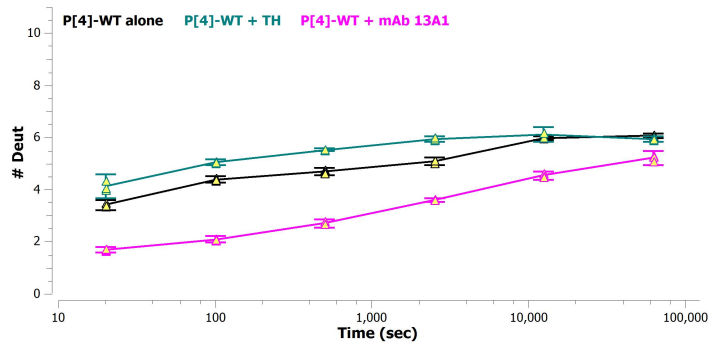

174-181: NEYINGL (#71)

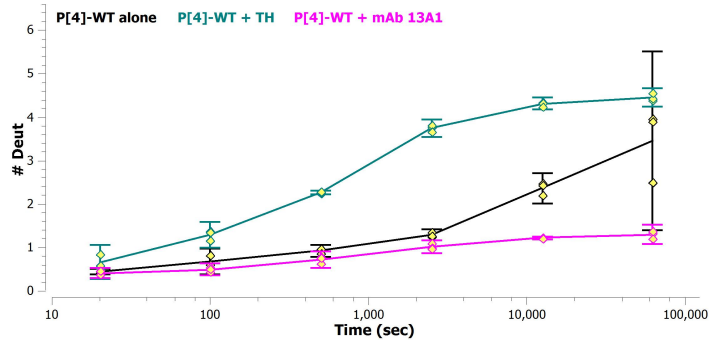

176-181: YINNGI (#72)

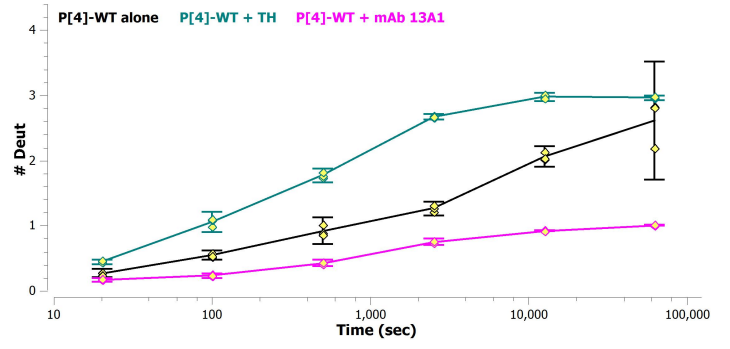

| State              | Start | End | Sequence                     | Search RT | Charge | Max D | 20s    | 20s    | 20s    | 100s   | 100s   | 100s   | 500s   | 500s   | 500s   | 2500s  | 2500s  | 2500s  | 12500s | 12500s | 12500s | 62500s | 62500s | 62500s |       |
|--------------------|-------|-----|------------------------------|-----------|--------|-------|--------|--------|--------|--------|--------|--------|--------|--------|--------|--------|--------|--------|--------|--------|--------|--------|--------|--------|-------|
|                    |       |     |                              |           |        |       | #D     | #D     | #D     | #D     | #D     | #D     | #D     | #D     | #D     | #D     | #D     | #D     | #D     | #D     | #D     | #D     | #D     | #D     |       |
| Pp [4]-C1735 alone | 1     | 6   | MOQYKA                       | 4.97      | 2      | 4     | 3.069  | 3.205  | 2.913  | 3.209  | 3.178  | 3.228  | 3.198  | 3.214  | 3.213  | 3.254  | 3.251  | 3.284  | 3.269  | 3.268  | 2.878  | 2.958  | 2.902  |        |       |
| Pp [4]-C1735 alone | 1     | 10  | MOQYKANSKF                   | 5.86      | 3      | 8     | 5.957  | 6.077  | 5.778  | 5.997  | 5.893  | 6.029  | 5.852  | 5.933  | 6.002  | 5.912  | 5.918  | 5.94   | 6.048  | 6.055  | 6.056  | 5.227  | 5.329  | 5.285  |       |
| Pp [4]-C1735 alone | 1     | 12  | MOQYKANSKF                   | 6.37      | 3      | 10    | 7.609  | 7.645  | 7.448  | 7.498  | 7.541  | 7.585  | 7.356  | 7.463  | 7.603  | 7.487  | 7.435  | 7.465  | 7.602  | 7.636  | 7.67   | 6.549  | 6.666  | 6.632  |       |
| Pp [4]-C1735 alone | 3     | 6   | VIKANSKF                     | 4.36      | 3      | 6     | 4.285  | 4.463  | 4.244  | 4.433  | 4.321  | 4.481  | 4.325  | 4.414  | 4.454  | 4.328  | 4.382  | 4.352  | 4.484  | 4.466  | 4.459  | 3.884  | 3.915  | 3.893  |       |
| Pp [4]-C1735 alone | 3     | 12  | VIKANSKF                     | 5.15      | 3      | 8     | 5.918  | 5.858  | 5.987  | 5.62   | 5.617  | 5.626  | 5.56   | 5.688  | 5.795  | 5.584  | 5.572  | 5.682  | 5.771  | 5.875  | 5.769  | 5.051  | 5.253  | 5.094  |       |
| Pp [4]-C1735 alone | 11    | 14  | IGIT                         | 3.91      | 1      | 2     | 1.681  | 1.532  | 1.446  | 2.043  | 1.663  | 1.721  | 1.747  | 1.879  | 1.756  | 1.879  | 1.891  | 1.882  | 1.734  | 1.91   | 1.89   | 1.648  | 1.689  | 1.661  |       |
| Pp [4]-C1735 alone | 11    | 15  | IGITE                        | 4.45      | 1      | 3     | 2.447  | 2.648  | 2.455  | 2.608  | 2.653  | 2.729  | 2.649  | 2.696  | 2.671  | 2.678  | 2.707  | 2.594  | 2.706  | 2.738  | 2.755  | 2.594  | 2.605  | 2.526  |       |
| Pp [4]-C1735 alone | 11    | 16  | IGITL                        | 7.57      | 1      | 4     | 3.563  | 3.688  | 3.765  | 3.642  | 3.591  | 3.673  | 3.566  | 3.593  | 3.626  | 3.603  | 3.509  | 3.606  | 3.645  | 3.66   | 3.644  | 3.194  | 3.269  | 3.295  |       |
| Pp [4]-C1735 alone | 11    | 23  | IGITELGSSGVL                 | 8.57      | 2      | 11    | 8.725  | 8.584  | 8.761  | 8.503  | 8.389  | 8.512  | 8.281  | 8.387  | 8.492  | 8.528  | 8.44   | 8.425  | 8.631  | 8.597  | 8.552  | 7.372  | 7.533  | 7.435  |       |
| Pp [4]-C1735 alone | 11    | 37  | IGITELGSSGVLDPGYOPTFFKPPND   | 8.82      | 2      | 21    | 11.722 | 11.811 | 12.413 | 12.25  | 12.235 | 12.448 | 12.732 | 12.815 | 12.934 | 14.098 | 14.051 | 13.988 | 15.491 | 15.422 | 15.449 | 14.519 | 14.734 | 14.589 |       |
| Pp [4]-C1735 alone | 11    | 39  | IGITELGSSGVLDPGYOPTFFKPPNDVW | 10.49     | 3      | 23    | 11.048 | 11.363 | 11.693 | 11.555 | 11.623 | 11.85  | 11.759 | 12.021 | 12.219 | 12.813 | 13.124 | 13.166 | 14.182 | 14.403 | 14.523 | 13.409 | 13.829 | 13.719 |       |
| Pp [4]-C1735 alone | 13    | 16  | ITEL                         | 4.9       | 1      | 2     | 1.6    | 1.685  | 1.924  | 1.645  | 1.591  | 1.833  | 1.586  | 1.704  | 1.498  | 1.558  | 1.567  | 1.601  | 1.617  | 1.656  | 1.705  | 1.452  | 1.453  | 1.435  |       |
| Pp [4]-C1735 alone | 13    | 23  | ITELGSSGVL                   | 7.09      | 1      | 9     | 6.219  | 6.327  | 6.629  | 6.351  | 6.266  | 6.155  | 6.277  | 6.269  | 6.108  | 6.319  | 6.329  | 6.352  | 6.471  | 6.477  | 6.488  | 5.465  | 5.467  | 5.51   |       |
| Pp [4]-C1735 alone | 13    | 37  | ITELGSSGVLDPGYOPTFFKPPND     | 8.08      | 2      | 19    | 9.57   | 9.688  | 10.103 | 10.209 | 10.161 | 10.333 | 10.778 | 10.83  | 11.015 | 12.227 | 12.153 | 13.59  | 13.5   | 13.541 | 12.847 | 13.009 | 12.914 |        |       |
| Pp [4]-C1735 alone | 15    | 37  | ELGSSGVLDPGYOPTFFKPPND       | 7.8       | 2      | 17    | 7.367  | 7.633  | 7.419  | 8.341  | 8.206  | 8.309  | 9.278  | 9.365  | 9.534  | 10.905 | 10.741 | 10.78  | 11.952 | 11.907 | 11.868 | 11.369 | 11.46  | 11.4   |       |
| Pp [4]-C1735 alone | 16    | 37  | LGSSGVLDPGYOPTFFKPPND        | 7.59      | 2      | 16    | 6.76   | 7.021  | 6.814  | 7.584  | 7.489  | 7.666  | 9.185  | 8.137  | 8.227  | 9.227  | 9.307  | 9.325  | 10.8   | 10.772 | 10.799 | 10.47  | 10.51  | 10.483 |       |
| Pp [4]-C1735 alone | 16    | 39  | LGSSGVLDPGYOPTFFKPPNDVW      | 9.79      | 2      | 18    | 6.32   | 6.708  | 6.298  | 7.169  | 7.185  | 7.337  | 7.5    | 7.723  | 7.808  | 8.652  | 8.721  | 8.75   | 9.95   | 10.077 | 10.136 | 9.745  | 9.908  | 9.866  |       |
| Pp [4]-C1735 alone | 16    | 41  | LGSSGVLDPGYOPTFFKPPNDVW      | 11.27     | 3      | 20    | 5.839  | 6.324  | 6.143  | 6.801  | 6.767  | 6.962  | 7.087  | 7.26   | 7.326  | 7.802  | 8.136  | 8.117  | 9.171  | 9.384  | 9.544  | 8.991  | 9.141  | 9.123  |       |
| Pp [4]-C1735 alone | 17    | 23  | GSSGVL                       | 4         | 1      | 5     | 3.51   | 3.525  | 3.571  | 3.508  | 3.423  | 3.531  | 3.548  | 3.425  | 3.496  | 3.414  | 3.442  | 3.525  | 3.831  | 3.44   | 3.544  | 3.544  | 3.397  | 3.402  |       |
| Pp [4]-C1735 alone | 17    | 37  | GSSGVLDPGYOPTFFKPPND         | 7.31      | 2      | 15    | 6.72   | 6.511  | 6.527  | 7.112  | 7.093  | 7.164  | 7.574  | 7.117  | 7.807  | 8.958  | 8.963  | 8.952  | 10.444 | 10.388 | 10.132 | 10.213 | 10.162 |        |       |
| Pp [4]-C1735 alone | 17    | 39  | GSSGVLDPGYOPTFFKPPNDVW       | 9.6       | 2      | 17    | 6.043  | 6.319  | 6.487  | 6.82   | 6.89   | 6.983  | 7.252  | 7.403  | 7.527  | 8.33   | 8.62   | 8.542  | 9.758  | 9.932  | 9.885  | 9.575  | 9.734  | 9.753  |       |
| Pp [4]-C1735 alone | 24    | 37  | DGPYOPTFFKPPND               | 9.11      | 2      | 8     | 2.406  | 2.563  | 2.451  | 2.725  | 2.745  | 2.789  | 3.209  | 3.263  | 3.289  | 4.358  | 4.452  | 4.438  | 5.638  | 5.717  | 5.706  | 5.941  | 5.988  | 5.957  |       |
| Pp [4]-C1735 alone | 24    | 39  | DGPYOPTFFKPPNDVW             | 6.26      | 2      | 10    | 2.376  | 2.588  | 2.85   | 2.778  | 2.725  | 2.778  | 3.275  | 3.273  | 3.289  | 4.413  | 4.294  | 4.461  | 5.481  | 5.478  | 5.572  | 5.839  | 5.803  | 5.872  |       |
| Pp [4]-C1735 alone | 24    | 41  | DGPYOPTFFKPPNDVWLL           | 10.95     | 2      | 12    | 2.528  | 2.547  | 2.711  | 2.568  | 2.62   | 2.635  | 3.006  | 3.026  | 2.982  | 3.876  | 4.083  | 4.079  | 5.94   | 5.071  | 5.234  | 5.283  | 5.285  | 5.241  |       |
| Pp [4]-C1735 alone | 38    | 41  | VWLL                         | 11.07     | 1      | 2     | 0.04   | 0.029  | 0.067  | 0.03   | 0.027  | 0.028  | 0.027  | 0.03   | 0.028  | 0.025  | 0.025  | 0.027  | 0.027  | 0.028  | 0.025  | 0.029  | 0.029  | 0.024  |       |
| Pp [4]-C1735 alone | 40    | 51  | LISSNTNGVVY                  | 7.63      | 2      | 10    | 3.308  | 3.515  | 3.467  | 3.706  | 3.703  | 3.75   | 3.719  | 3.828  | 3.809  | 3.981  | 4.037  | 4.061  | 4.479  | 4.553  | 4.569  | 4.736  | 4.871  | 4.661  |       |
| Pp [4]-C1735 alone | 40    | 59  | LISSNTNGVVYESTNNDF           | 8.08      | 2      | 18    | 3.459  | 3.796  | 3.737  | 4.038  | 4.078  | 4.119  | 4.106  | 4.183  | 4.201  | 4.472  | 4.545  | 4.558  | 5.333  | 5.412  | 5.422  | 5.735  | 5.823  | 5.845  |       |
| Pp [4]-C1735 alone | 41    | 51  | LISSNTNGVVY                  | 6.14      | 2      | 9     | 3.412  | 3.437  | 3.5    | 3.658  | 3.644  | 3.713  | 3.773  | 3.762  | 3.772  | 3.962  | 3.87   | 3.903  | 4.466  | 4.455  | 4.438  | 4.555  | 4.522  | 4.479  |       |
| Pp [4]-C1735 alone | 42    | 51  | LISSNTNGVVY                  | 5.31      | 2      | 8     | 3.294  | 3.447  | 3.179  | 3.673  | 3.68   | 3.754  | 3.72   | 3.771  | 3.8    | 3.877  | 3.918  | 3.907  | 4.271  | 4.334  | 4.335  | 4.05   | 4.039  | 4.025  |       |
| Pp [4]-C1735 alone | 42    | 59  | LISSNTNGVVYESTNNDF           | 6.79      | 2      | 16    | 3.471  | 3.778  | 3.623  | 3.979  | 4.009  | 4.058  | 4.048  | 4.158  | 4.179  | 4.45   | 4.526  | 4.527  | 5.21   | 5.263  | 5.288  | 5.307  | 5.385  | 5.381  |       |
| Pp [4]-C1735 alone | 59    | 63  | FWTAV                        | 8.09      | 1      | 3     | 0.095  | 0.05   | 0.097  | 0.023  | 0.023  | 0.023  | 0.025  | 0.023  | 0.024  | 0.021  | 0.022  | 0.04   | 0.027  | 0.015  | 0.027  | 0.015  | 0.021  | 0.032  | 0.028 |
| Pp [4]-C1735 alone | 59    | 64  | FWTAVI                       | 9.72      | 1      | 4     | 0.052  | -0.007 | -0.197 | -0.034 | -0.043 | -0.066 | -0.025 | -0.053 | -0.055 | -0.038 | -0.083 | -0.041 | -0.019 | -0.081 | -0.069 | -0.046 | -0.063 | -0.049 |       |
| Pp [4]-C1735 alone | 60    | 63  | WTAV                         | 5.56      | 1      | 2     | 0.038  | 0.031  | 0.067  | 0.031  | 0.03   | 0.027  | 0.025  | 0.021  | 0.023  | 0.023  | 0.026  | 0.024  | 0.027  | 0.029  | 0.03   | 0.025  | 0.023  | 0.026  |       |
| Pp [4]-C1735 alone | 60    | 64  | WTAVI                        | 7.8       | 1      | 3     | 0.049  | 0.042  | 0.062  | 0.036  | 0.035  | 0.032  | 0.022  | 0.025  | 0.023  | 0.029  | 0.025  | 0.033  | 0.039  | 0.029  | 0.028  | 0.023  | 0.034  | 0.029  |       |
| Pp [4]-C1735 alone | 64    | 73  | IAPVPHVST                    | 4.1       | 2      | 7     | 1.471  | 1.527  | 1.378  | 1.93   | 1.941  | 1.986  | 2.22   | 2.267  | 2.292  | 2.405  | 2.458  | 2.451  | 2.884  | 2.905  | 2.921  | 3.156  | 3.179  | 3.163  |       |
| Pp [4]-C1735 alone | 64    | 76  | IAPVPHVSTNRQ                 | 3.68      | 3      | 10    | 2.716  | 2.824  | 2.667  | 3.535  | 3.493  | 3.612  | 3.948  | 4.046  | 4.131  | 4.335  | 4.372  | 4.385  | 5.29   | 5.341  | 5.361  | 5.49   | 5.436  | 5.465  |       |
| Pp [4]-C1735 alone | 64    | 79  | IAPVPHVSTNRQYL               | 7.03      | 3      | 13    | 2.711  | 2.82   | 2.947  | 3.723  | 3.635  | 3.734  | 4.225  | 4.349  | 4.458  | 4.597  | 4.676  | 4.664  | 5.535  | 5.51   | 5.547  | 5.619  | 5.605  | 5.69   |       |
| Pp [4]-C1735 alone | 65    | 73  | AVEPHVST                     | 3.17      | 2      | 6     | 1.448  | 1.534  | 1.411  | 1.89   | 1.98   | 1.98   | 2.264  | 2.287  | 2.298  | 2.421  | 2.453  | 2.4    | 2.888  | 2.913  | 2.903  | 3.183  | 3.189  | 3.167  |       |
| Pp [4]-C1735 alone | 65    | 76  | AVEPHVSTNRQ                  | 2.92      | 3      | 9     | 2.747  | 2.848  | 2.666  | 3.564  | 3.55   | 3.654  | 4.029  | 4.117  | 4.196  | 4.406  | 4.459  | 4.45   | 5.377  | 5.471  | 5.431  | 5.639  | 5.585  | 5.584  |       |
| Pp [4]-C1735 alone | 65    | 79  | AVEPHVSTNRQYL                | 6.6       | 3      | 12    | 2.952  | 2.92   | 2.815  | 3.958  | 3.727  | 3.773  | 4.301  | 4.466  | 4.526  | 4.677  | 4.678  | 4.723  | 5.626  | 5.615  | 5.637  | 5.689  | 5.693  | 5.746  |       |
| Pp [4]-C1735 alone | 66    | 76  | VEPHVSTNRQ                   | 3.68      | 2      | 8     | 2.537  | 2.567  | 2.486  | 3.267  | 3.26   | 3.412  | 3.655  | 3.679  | 3.819  | 4.102  | 4.047  | 4.094  | 4.887  | 5.002  | 5.037  | 5.055  | 4.968  | 5.145  |       |
| Pp [4]-C1735 alone | 74    | 79  | NRQYL                        | 6.44      | 2      | 4     | 0.781  | 0.707  | 1.032  | 1.311  | 1.335  | 1.393  | 1.703  | 1.779  | 1.876  | 1.817  | 1.809  | 1.866  | 1.915  | 1.883  | 1.908  | 1.859  | 1.823  | 1.835  |       |
| Pp [4]-C1735 alone | 80    | 86  | FGENKQF                      | 5.08      | 2      | 5     | 1.265  | 1.336  | 1.329  | 1.414  | 1.393  | 1.437  | 1.375  | 1.405  | 1.44   | 1.421  | 1.424  | 1.427  | 1.595  | 1.601  | 1.602  | 1.88   | 1.875  | 1.869  |       |
| Pp [4]-C1735 alone | 80    | 97  | FGENKQFVNNNSDKWKF            | 8.17      | 4      | 16    | 2.714  | 2.864  | 2.519  | 3.092  | 2.916  | 2.946  | 3.208  | 3.193  | 3.26   | 4.15   | 4.126  | 4.085  | 5.473  | 5.408  | 5.351  | 5.887  | 5.847  | 5.823  |       |
| Pp [4]-C1735 alone | 81    | 97  | FGENKQFVNNNSDKWKF            | 7.59      | 4      | 15    | 2.593  | 2.73   | 2.602  | 2.962  | 2.802  | 2.828  | 3.076  | 3.093  | 3.185  | 4.13   | 4.145  | 4.057  | 5.462  | 5.396  | 5.342  | 5.79   | 5.776  | 5.777  |       |
| Pp [4]-C1735 alone | 84    | 97  | KQFVNNNSDKWKF                | 7.45      | 4      | 12    | 1.294  | 1.368  | 0.862  | 1.595  | 1.424  | 1.408  | 1.708  | 1.665  | 1.695  | 2.585  | 2.542  | 2.364  | 3.768  | 3.622  | 3.528  | 4.474  | 4.069  | 3.949  |       |
| Pp [4]-C1735 alone | 87    | 97  | VNNSDKWKF                    | 7.21      | 3      | 9     | 0.982  | 1.057  | 0.877  | 1.177  | 1.102  | 1.121  | 1.398  | 1.43   | 1.498  | 2.293  | 2.321  | 2.306  | 3.372  | 3.386  | 3.361  | 3.403  | 3.384  | 3.34   |       |
| Pp [4]-C1735 alone | 98    | 100 | FEM                          | 6.21      | 1      | 1     | 0.03   | 0.023  | 0.047  | 0.027  | 0.024  | 0.023  | 0.02   | 0.02   | 0.023  | 0.024  | 0.02   | 0.02   | 0.023  | 0.026  | 0.028  | 0.028  | 0.03   | 0.027  |       |
| Pp [4]-C1735 alone | 98    | 101 | FEMF                         | 9.22      | 1      | 2     | 0.017  | 0.013  | 0.117  | 0.017  | 0.018  | 0.004  | 0.002  | 0.004  | 0.019  | 0.043  | -0.023 | -0.006 | -0.008 | 0.013  | 0.015  | 0.027  |        |        |       |

|                               |     |     |                                  |       |   |    |        |       |        |        |        |        |        |        |        |        |        |        |        |        |        |        |        |        |
|-------------------------------|-----|-----|----------------------------------|-------|---|----|--------|-------|--------|--------|--------|--------|--------|--------|--------|--------|--------|--------|--------|--------|--------|--------|--------|--------|
| Pd P[4]-C1735 with Thimerosal | 24  | 41  | DGPYQPTFFKPPNDYWLL               | 10.95 | 2 | 12 | 2.644  | 2.281 | 2.574  | 2.656  | 2.64   | 2.537  | 3.043  | 3.181  | 3.158  | 4.072  | 4.027  | 4.064  | 5.004  | 4.821  | 4.852  | 5.409  | 5.27   | 5.328  |
| Pd P[4]-C1735 with Thimerosal | 38  | 41  | YWLL                             | 11.07 | 1 | 2  | 0.035  | 0.047 | 0.026  | 0.027  | 0.024  | 0.029  | 0.025  | 0.025  | 0.023  | 0.029  | 0.027  | 0.023  | 0.02   | 0.025  | 0.028  | 0.028  | 0.031  | 0.027  |
| Pd P[4]-C1735 with Thimerosal | 40  | 51  | LUSSTNGVYV                       | 7.63  | 2 | 10 | 3.571  | 3.503 | 3.658  | 3.726  | 3.793  | 3.701  | 3.884  | 3.851  | 3.833  | 4.002  | 4.066  | 4.076  | 4.532  | 4.22   | 4.442  | 4.928  | 4.909  | 4.717  |
| Pd P[4]-C1735 with Thimerosal | 40  | 59  | LUSSTNGVYVYESTNNDF               | 8.16  | 2 | 18 | 3.869  | 3.839 | 3.953  | 4.116  | 4.113  | 4.076  | 4.218  | 4.284  | 4.213  | 4.661  | 4.633  | 4.642  | 5.435  | 5.068  | 5.209  | 5.882  | 5.901  | 5.974  |
| Pd P[4]-C1735 with Thimerosal | 41  | 51  | LISSTNGVYV                       | 6.14  | 2 | 9  | 3.482  | 3.383 | 3.55   | 3.651  | 3.709  | 3.675  | 3.749  | 3.704  | 3.712  | 3.942  | 3.919  | 3.962  | 4.448  | 4.088  | 4.248  | 4.688  | 4.549  | 4.601  |
| Pd P[4]-C1735 with Thimerosal | 42  | 51  | ISSTNGVYV                        | 5.31  | 2 | 8  | 3.503  | 3.405 | 3.59   | 3.716  | 3.749  | 3.65   | 3.804  | 3.778  | 3.753  | 3.961  | 3.956  | 3.959  | 4.29   | 3.959  | 4.155  | 4.044  | 4.068  | 4.088  |
| Pd P[4]-C1735 with Thimerosal | 42  | 59  | ISSTNGVYVYESTNNDF                | 6.79  | 2 | 16 | 3.803  | 3.772 | 3.899  | 4.062  | 4.065  | 4.003  | 4.186  | 4.162  | 4.141  | 4.597  | 4.59   | 4.589  | 5.284  | 4.924  | 5.078  | 5.449  | 5.435  | 5.498  |
| Pd P[4]-C1735 with Thimerosal | 59  | 63  | FWTAV                            | 8.09  | 1 | 3  | 0.047  | 0.029 | 0.029  | 0.038  | 0.022  | 0.025  | 0.021  | 0.022  | 0.016  | 0.022  | 0.013  | 0.032  | 0.019  | 0.013  | 0.024  | 0.017  | 0.033  | 0.024  |
| Pd P[4]-C1735 with Thimerosal | 59  | 64  | FWTAVI                           | 9.72  | 1 | 4  | -0.024 | 0.039 | -0.015 | -0.045 | -0.049 | -0.059 | -0.07  | -0.059 | -0.044 | -0.06  | -0.084 | -0.067 | -0.063 | -0.05  | -0.039 | -0.047 | -0.056 | -0.074 |
| Pd P[4]-C1735 with Thimerosal | 60  | 63  | WTAV                             | 5.56  | 1 | 2  | 0.027  | 0.04  | 0.033  | 0.034  | 0.023  | 0.03   | 0.029  | 0.024  | 0.022  | 0.033  | 0.025  | 0.025  | 0.029  | 0.022  | 0.021  | 0.022  | 0.022  | 0.027  |
| Pd P[4]-C1735 with Thimerosal | 60  | 64  | WTAVI                            | 7.8   | 1 | 3  | 0.037  | 0.052 | 0.035  | 0.037  | 0.028  | 0.03   | 0.025  | 0.026  | 0.03   | 0.039  | 0.029  | 0.031  | 0.028  | 0.025  | 0.029  | 0.03   | 0.029  | 0.033  |
| Pd P[4]-C1735 with Thimerosal | 64  | 73  | IAVEPHVSQT                       | 4.1   | 2 | 7  | 1.54   | 1.5   | 1.583  | 1.933  | 1.96   | 1.931  | 2.284  | 2.266  | 2.271  | 2.478  | 2.491  | 2.464  | 2.914  | 2.76   | 2.805  | 3.203  | 3.184  | 3.231  |
| Pd P[4]-C1735 with Thimerosal | 64  | 76  | IAVEPHVSQTRNQ                    | 3.68  | 3 | 10 | 2.903  | 2.813 | 2.999  | 3.543  | 3.543  | 3.533  | 4.1    | 4.061  | 4.021  | 4.497  | 4.516  | 4.498  | 5.344  | 5.037  | 5.118  | 5.497  | 5.486  | 5.593  |
| Pd P[4]-C1735 with Thimerosal | 64  | 79  | IAVEPHVSQTRNQYL                  | 7.03  | 3 | 13 | 2.863  | 2.957 | 2.971  | 3.805  | 3.707  | 3.78   | 4.512  | 4.449  | 4.422  | 4.824  | 4.809  | 4.811  | 5.575  | 5.302  | 5.408  | 5.673  | 5.716  | 5.792  |
| Pd P[4]-C1735 with Thimerosal | 65  | 73  | AVEPHVSQT                        | 3.17  | 2 | 6  | 1.539  | 1.452 | 1.616  | 1.948  | 1.962  | 1.964  | 2.292  | 2.257  | 2.299  | 2.497  | 2.48   | 2.462  | 2.953  | 2.811  | 2.831  | 3.207  | 3.207  | 3.209  |
| Pd P[4]-C1735 with Thimerosal | 65  | 76  | AVEPHVSQTRNQ                     | 2.92  | 3 | 9  | 2.937  | 2.782 | 2.993  | 3.566  | 3.6    | 3.547  | 4.143  | 4.106  | 4.088  | 4.56   | 4.591  | 4.56   | 5.426  | 5.121  | 5.188  | 5.638  | 5.598  | 5.702  |
| Pd P[4]-C1735 with Thimerosal | 65  | 79  | AVEPHVSQTRNQYL                   | 6.6   | 3 | 12 | 2.963  | 3.075 | 3.07   | 3.984  | 3.765  | 3.868  | 4.559  | 4.583  | 4.515  | 4.923  | 4.875  | 4.899  | 5.683  | 5.35   | 5.488  | 5.764  | 5.754  | 5.861  |
| Pd P[4]-C1735 with Thimerosal | 66  | 76  | VEPHVSQTRNQ                      | 3.68  | 2 | 8  | 2.608  | 2.513 | 2.795  | 3.365  | 3.345  | 3.272  | 3.925  | 3.839  | 3.835  | 4.206  | 4.179  | 4.114  | 4.997  | 4.795  | 4.72   | 5.115  | 5.149  | 5.289  |
| Pd P[4]-C1735 with Thimerosal | 74  | 79  | NRQYL                            | 6.44  | 2 | 4  | 0.868  | 0.785 | 0.793  | 1.296  | 1.337  | 1.351  | 1.758  | 1.789  | 1.788  | 1.882  | 1.883  | 1.85   | 1.914  | 1.848  | 1.86   | 1.978  | 1.944  | 1.878  |
| Pd P[4]-C1735 with Thimerosal | 80  | 86  | FGENKQF                          | 5.18  | 2 | 5  | 1.348  | 1.298 | 1.404  | 1.403  | 1.414  | 1.378  | 1.426  | 1.398  | 1.388  | 1.471  | 1.464  | 1.455  | 1.602  | 1.475  | 1.51   | 1.886  | 1.891  | 1.917  |
| Pd P[4]-C1735 with Thimerosal | 80  | 97  | FGENKQFNVENNSDKWKF               | 8.07  | 4 | 16 | 2.959  | 2.817 | 3.006  | 2.959  | 2.958  | 2.972  | 3.296  | 3.25   | 3.238  | 3.448  | 3.218  | 3.449  | 5.34   | 5.052  | 5.139  | 5.756  | 5.875  | 5.902  |
| Pd P[4]-C1735 with Thimerosal | 81  | 97  | GENKQFNVENNSDKWKF                | 7.59  | 4 | 15 | 2.816  | 2.747 | 2.889  | 2.869  | 2.885  | 2.882  | 3.2    | 3.151  | 3.114  | 3.138  | 3.221  | 3.162  | 3.327  | 5.103  | 5.165  | 5.715  | 5.775  | 5.81   |
| Pd P[4]-C1735 with Thimerosal | 84  | 97  | KQFNVENNSDKWKF                   | 7.45  | 4 | 12 | 1.554  | 1.271 | 1.574  | 1.443  | 1.423  | 1.425  | 1.705  | 1.642  | 1.656  | 2.419  | 2.594  | 2.485  | 3.421  | 3.387  | 3.31   | 3.859  | 3.894  | 3.943  |
| Pd P[4]-C1735 with Thimerosal | 87  | 97  | NVENNSDKWKF                      | 7.21  | 3 | 9  | 1.054  | 1.021 | 1.067  | 1.154  | 1.102  | 1.137  | 1.498  | 1.449  | 1.426  | 2.353  | 2.369  | 2.37   | 3.351  | 3.208  | 3.221  | 3.37   | 3.412  | 3.458  |
| Pd P[4]-C1735 with Thimerosal | 98  | 100 | FEM                              | 6.21  | 1 | 1  | 0.026  | 0.031 | 0.026  | 0.03   | 0.024  | 0.03   | 0.025  | 0.024  | 0.025  | 0.026  | 0.026  | 0.024  | 0.024  | 0.023  | 0.024  | 0.029  | 0.029  | 0.029  |
| Pd P[4]-C1735 with Thimerosal | 98  | 101 | FEMF                             | 9.22  | 1 | 2  | -0.001 | 0.033 | 0.038  | 0.008  | 0.01   | 0.007  | 0.002  | -0.006 | 0.006  | -0.003 | 0.02   | -0.002 | -0.008 | -0.005 | 0.029  | 0.008  | 0.012  | 0.014  |
| Pd P[4]-C1735 with Thimerosal | 98  | 121 | FEMFKGSGQDFSNRRLTSSNRL           | 7.14  | 3 | 22 | 7.579  | 7.155 | 7.849  | 8.319  | 7.919  | 8.154  | 8.39   | 8.175  | 8.437  | 8.381  | 8.324  | 8.386  | 8.906  | 7.883  | 8.632  | 8.243  | 8.347  | 8.644  |
| Pd P[4]-C1735 with Thimerosal | 98  | 123 | FEMFKGSGQDFSNRRLTSSNRLVG         | 7.21  | 4 | 24 | 8.117  | 7.024 | 7.516  | 8.443  | 8.433  | 8.191  | 8.716  | 8.682  | 8.504  | 8.582  | 8.22   | 8.65   | 9.425  | 8.489  | 8.607  | 8.737  | 9.223  | 8.656  |
| Pd P[4]-C1735 with Thimerosal | 101 | 109 | FKGSGQDF                         | 4.87  | 2 | 7  | 4.072  | 3.827 | 4.215  | 4.16   | 4.192  | 4.105  | 4.378  | 4.356  | 4.27   | 4.429  | 4.467  | 4.441  | 4.456  | 4.011  | 4.23   | 3.975  | 3.99   | 4.046  |
| Pd P[4]-C1735 with Thimerosal | 101 | 121 | FKGSGQDFSNRRLTSSNRL              | 5.24  | 3 | 19 | 8.661  | 8.156 | 8.812  | 8.939  | 9.007  | 8.869  | 9.483  | 9.451  | 9.47   | 9.548  | 9.816  | 9.691  | 10.016 | 8.924  | 9.359  | 9.117  | 9.298  | 9.463  |
| Pd P[4]-C1735 with Thimerosal | 101 | 123 | FKGSGQDFSNRRLTSSNRLVG            | 5.42  | 4 | 21 | 8.326  | 7.391 | 8.54   | 8.543  | 8.691  | 8.522  | 8.977  | 9.141  | 9.139  | 9.157  | 9.569  | 9.231  | 9.592  | 7.848  | 9.273  | 9.053  | 9.384  | 9.487  |
| Pd P[4]-C1735 with Thimerosal | 101 | 125 | FKGSGQDFSNRRLTSSNRLVGM           | 7.72  | 4 | 23 | 7.84   | 7.863 | 7.896  | 8.477  | 8.536  | 8.533  | 8.843  | 8.996  | 8.952  | 8.907  | 8.859  | 9.213  | 8.586  | 8.951  | 9.264  | 8.696  | 8.257  | 8.539  |
| Pd P[4]-C1735 with Thimerosal | 102 | 121 | KGSGQDFSNRRLTSSNRL               | 4.89  | 4 | 18 | 7.918  | 7.803 | 8.071  | 8.082  | 8.214  | 8.147  | 8.613  | 8.641  | 8.614  | 8.914  | 8.821  | 8.806  | 9.205  | 8.167  | 8.408  | 8.501  | 8.696  | 8.813  |
| Pd P[4]-C1735 with Thimerosal | 122 | 124 | VGM                              | 2.91  | 1 | 1  | 0.013  | 0.106 | 0.021  | 0.009  | 0.011  | -0.004 | -0.033 | -0.039 | 0.02   | 0.033  | 0.052  | 0.007  | 0.103  | 0.035  | 0.114  | 0.215  | 0.236  | 0.286  |
| Pd P[4]-C1735 with Thimerosal | 122 | 125 | VGM                              | 5.69  | 1 | 2  | 0.014  | 0.023 | 0.012  | 0.017  | 0.015  | 0.01   | 0.01   | 0.008  | 0.012  | 0.027  | 0.031  | 0.024  | 0.105  | 0.102  | 0.085  | 0.37   | 0.379  | 0.401  |
| Pd P[4]-C1735 with Thimerosal | 122 | 134 | VGMLKYGGRRVWTF                   | 9.5   | 3 | 11 | 1.453  | 0.859 | 1.215  | 1.021  | 1.18   | 1.077  | 1.208  | 1.162  | 1.169  | 1.224  | 1.267  | 1.278  | 1.608  | 1.458  | 1.428  | 2.474  | 2.478  | 2.558  |
| Pd P[4]-C1735 with Thimerosal | 122 | 147 | VGMLKYGGRRVWFHGETPRATDSSN        | 7.33  | 4 | 23 | 3.491  | 2.69  | 3.899  | 3.322  | 3.194  | 4.096  | 3.333  | 3.531  | 3.415  | 4.278  | 3.659  | 3.949  | 4.945  | 4.608  | 4.664  | 7.176  | 7.934  | 7.92   |
| Pd P[4]-C1735 with Thimerosal | 122 | 153 | VGMLKYGGRRVWFHGETPRATDSSNADLNN   | 7.45  | 4 | 29 | 5.555  | 5.862 | 6.52   | 6.953  | 7.264  | 7.237  | 8.143  | 8.191  | 7.998  | 8.631  | 8.723  | 8.715  | 10.125 | 9.173  | 10.173 | 13.993 | 12.445 | 12.465 |
| Pd P[4]-C1735 with Thimerosal | 122 | 155 | VGMLKYGGRRVWFHGETPRATDSSNADLNNIS | 7.75  | 4 | 31 | 6.656  | 6.566 | 6.799  | 7.792  | 7.938  | 7.777  | 8.96   | 8.893  | 8.833  | 9.613  | 9.628  | 11.158 | 10.502 | 10.762 | 13.084 | 13.188 | 13.167 | 13.245 |
| Pd P[4]-C1735 with Thimerosal | 124 | 134 | MLKYGGRRVWTF                     | 9.17  | 3 | 9  | 1.506  | 0.827 | 1.274  | 1.093  | 1.166  | 1.134  | 1.202  | 1.141  | 1.168  | 1.19   | 1.214  | 1.227  | 1.541  | 1.413  | 1.424  | 2.266  | 2.281  | 2.265  |
| Pd P[4]-C1735 with Thimerosal | 124 | 151 | MLKYGGRRVWFHGETPRATDSSNADL       | 7.45  | 4 | 25 | 4.624  | 3.618 | 4.465  | 4.602  | 5.017  | 4.756  | 5.686  | 5.719  | 5.734  | 6.174  | 6.423  | 6.729  | 7.543  | 7.123  | 7.112  | 9.11   | 9.357  | 9.298  |
| Pd P[4]-C1735 with Thimerosal | 124 | 155 | MLKYGGRRVWFHGETPRATDSSNADLNNIS   | 7.41  | 4 | 29 | 6.445  | 6.709 | 6.829  | 7.983  | 7.856  | 7.981  | 9.018  | 8.775  | 8.926  | 9.656  | 9.788  | 9.728  | 11.154 | 10.611 | 10.93  | 13.056 | 13.123 | 13.252 |
| Pd P[4]-C1735 with Thimerosal | 125 | 134 | LYKGGRRVWTF                      | 8.83  | 3 | 8  | 1.542  | 1.16  | 1.429  | 1.234  | 1.354  | 1.316  | 1.371  | 1.327  | 1.286  | 1.35   | 1.422  | 1.427  | 1.685  | 1.574  | 1.522  | 2.323  | 2.419  | 2.406  |
| Pd P[4]-C1735 with Thimerosal | 125 | 151 | LYKGGRRVWFHGETPRATDSSNADL        | 7.14  | 4 | 24 | 4.86   | 4.073 | 4.819  | 5.178  | 5.389  | 5.295  | 6.213  | 6.152  | 6.226  | 6.664  | 6.42   | 6.818  | 8.066  | 7.506  | 7.593  | 9.424  | 9.756  | 8.967  |
| Pd P[4]-C1735 with Thimerosal | 125 | 153 | LYKGGRRVWFHGETPRATDSSNADLNN      | 6.18  | 4 | 26 | 6.765  | 6.528 | 6.905  | 7.76   | 7.694  | 7.371  | 8.503  | 8.434  | 8.401  | 9.026  | 9.166  | 9.1    | 10.388 | 9.839  | 10.095 | 11.912 | 12.197 | 12.364 |
| Pd P[4]-C1735 with Thimerosal | 125 | 155 | LYKGGRRVWFHGETPRATDSSNADLNNIS    | 7.62  | 4 | 28 | 6.841  | 6.812 | 7.213  | 8.383  | 8.404  | 8.369  | 9.324  | 9.34   | 9.28   | 9.999  | 10.106 | 10.005 | 11.553 | 11.135 | 11.326 | 13.481 | 13.512 | 13.562 |
| Pd P[4]-C1735 with Thimerosal | 126 | 155 | HYGRRVWFHGETPRATDSSNADLNNIS      | 6.74  | 4 | 27 | 6.981  | 6.757 | 7.184  | 8.346  | 8.569  | 8.43   | 9.561  | 9.429  | 9.421  | 10.195 | 10.3   | 10.21  | 11.761 | 10.974 | 11.385 | 13.391 | 13.66  | 13.682 |
| Pd P[4]-C1735 with Thimerosal | 135 | 151 | KXGTRATDSSNADL                   | 4.1   | 3 | 14 | 3.437  | 3.217 | 3.492  | 4.306  | 4.333  | 4.302  | 5.303  | 5.317  | 5.28   | 6.104  | 6.166  | 6.111  | 7.18   | 6.811  | 6.84   | 8.191  | 8.125  | 8.383  |
| Pd P[4]-C1735 with Thimerosal | 135 | 155 | HGETPRATDSSNADLNNIS              | 4.76  | 3 | 18 | 5.154  | 5.293 | 5.388  | 6.521  | 6.502  | 6.478  | 7.777  | 7.826  | 7.681  | 8.647  | 8.673  | 8.599  | 9.875  | 9.23   |        |        |        |        |

|                         |     |     |                                   |      |   |    |        |       |       |       |       |        |        |        |        |        |        |       |        |        |        |        |        |        |
|-------------------------|-----|-----|-----------------------------------|------|---|----|--------|-------|-------|-------|-------|--------|--------|--------|--------|--------|--------|-------|--------|--------|--------|--------|--------|--------|
| Pd P[4]-C1735 with 13A1 | 98  | 101 | FEMF                              | 9.22 | 1 | 2  | -0.013 | 0.033 | 0.059 | 0.029 | 0.005 | -0.027 | -0.029 | -0.017 | -0.006 | -0.004 | -0.012 | -0.02 | -0.014 | -0.005 | -0.018 | 0.014  | 0.002  | 0      |
| Pd P[4]-C1735 with 13A1 | 98  | 121 | FEMFKGSSQGFDSNRRLTSSNRL           | 7.14 | 3 | 22 | 5.611  | 5.496 | 5.663 | 6.372 | 6.344 | 5.885  | 6.038  | 6.265  | 6.19   | 6.994  | 7.197  | 7.22  | 6.942  | 7.087  | 6.517  | 7.279  | 7.11   | 7.138  |
| Pd P[4]-C1735 with 13A1 | 98  | 123 | FEMFKGSSQGFDSNRRLTSSNRLVG         | 7.21 | 4 | 24 | 5.312  | 6.04  | 5.041 | 6.128 | 7.148 | 6.138  | 6.392  | 7.502  | 6.782  | 7.45   | 8.109  | 7.978 | 7.044  | 7.36   | 6.91   | 7.415  | 7.741  | 7.523  |
| Pd P[4]-C1735 with 13A1 | 101 | 109 | FKGSSQGF                          | 4.87 | 2 | 7  | 3.917  | 3.971 | 3.859 | 4.207 | 4.223 | 4.176  | 4.389  | 4.566  | 4.532  | 4.856  | 4.54   | 4.762 | 4.568  | 4.592  | 4.458  | 4.835  | 4.625  | 4.1    |
| Pd P[4]-C1735 with 13A1 | 101 | 121 | FKGSSQGFDSNRRLTSSNRL              | 5.24 | 3 | 19 | 6.24   | 6.862 | 6.568 | 7.291 | 7.598 | 7.151  | 7.422  | 7.43   | 7.691  | 8.581  | 8.69   | 8.7   | 8.194  | 8.535  | 7.972  | 8.53   | 8.448  | 8.316  |
| Pd P[4]-C1735 with 13A1 | 101 | 123 | FKGSSQGFDSNRRLTSSNRLVG            | 5.42 | 4 | 21 | 6.207  | 6.792 | 6.499 | 7.119 | 7.471 | 7.043  | 7.317  | 7.287  | 7.538  | 8.336  | 8.427  | 8.483 | 8.067  | 8.378  | 7.819  | 8.487  | 8.426  | 8.286  |
| Pd P[4]-C1735 with 13A1 | 101 | 125 | FKGSSQGFDSNRRLTSSNRLVGM           | 7.72 | 4 | 23 | 6.195  | 6.752 | 6.115 | 7.028 | 7.167 | 6.672  | 7.072  | 6.852  | 7.232  | 8.213  | 8.03   | 8.109 | 7.923  | 8.023  | 7.236  | 8.38   | 8.215  | 8.236  |
| Pd P[4]-C1735 with 13A1 | 102 | 121 | KGSSQGFDSNRRLTSSNRL               | 4.89 | 4 | 18 | 5.53   | 6.154 | 5.95  | 6.565 | 6.751 | 6.6    | 6.669  | 6.668  | 6.984  | 7.749  | 7.882  | 7.96  | 7.404  | 7.787  | 7.344  | 7.674  | 7.712  | 7.706  |
| Pd P[4]-C1735 with 13A1 | 122 | 124 | VGM                               | 2.91 | 1 | 1  | 0.03   | 0.037 | 0.123 | 0.104 | 0.02  | 0.045  | 0.013  | 0.028  | 0.04   | 0.009  | 0.031  | 0.021 | 0.069  | 0.054  | 0.075  | 0.18   | 0.157  | 0.13   |
| Pd P[4]-C1735 with 13A1 | 122 | 125 | VGML                              | 5.69 | 1 | 2  | 0.053  | 0.039 | 0.069 | 0.023 | 0.02  | 0.026  | 0.068  | 0.018  | 0.028  | 0.099  | 0.093  | 0.162 | 0.13   | 0.114  | 0.096  | 0.299  | 0.252  | 0.356  |
| Pd P[4]-C1735 with 13A1 | 122 | 134 | VGMLKYGGRVWTF                     | 9.5  | 3 | 11 | 1.248  | 1.451 | 1.381 | 1.143 | 1.425 | 1.364  | 1.218  | 1.298  | 1.312  | 1.305  | 1.399  | 1.381 | 1.398  | 1.506  | 1.393  | 2.028  | 2.078  | 2.013  |
| Pd P[4]-C1735 with 13A1 | 122 | 147 | VGMLKYGGRVWTFHGETPRATDSSN         | 7.33 | 4 | 23 | 3.057  | 3.308 | 2.665 | 2.899 | 3.264 | 3.376  | 2.973  | 3.589  | 3.621  | 3.934  | 4.011  | 4.069 | 3.953  | 4.291  | 3.982  | 5.664  | 5.889  | 5.725  |
| Pd P[4]-C1735 with 13A1 | 122 | 153 | VGMLKYGGRVWTFHGETPRATDSSNTADLNN   | 7.45 | 4 | 29 | 5.734  | 5.976 | 5.753 | 6.978 | 6.978 | 6.441  | 7.571  | 7.443  | 7.535  | 8.302  | 8.265  | 8.285 | 8.81   | 8.767  | 8.296  | 10.404 | 10.252 | 9.988  |
| Pd P[4]-C1735 with 13A1 | 122 | 155 | VGMLKYGGRVWTFHGETPRATDSSNTADLNNIS | 7.75 | 4 | 31 | 5.802  | 5.931 | 5.792 | 7.276 | 6.841 | 6.573  | 7.228  | 6.875  | 7.182  | 8.149  | 8.11   | 8.132 | 8.508  | 8.196  | 8.028  | 10.585 | 10.277 | 9.522  |
| Pd P[4]-C1735 with 13A1 | 124 | 134 | MLKYGGRVWTF                       | 9.17 | 3 | 9  | 1.28   | 1.414 | 1.38  | 1.178 | 1.471 | 1.444  | 1.287  | 1.328  | 1.412  | 1.349  | 1.471  | 1.459 | 1.487  | 1.563  | 1.456  | 2.019  | 2.071  | 1.999  |
| Pd P[4]-C1735 with 13A1 | 124 | 151 | MLKYGGRVWTFHGETPRATDSSNTADL       | 7.45 | 4 | 25 | 3.992  | 4.301 | 3.996 | 4.764 | 5.185 | 5.203  | 5.757  | 5.836  | 5.933  | 6.35   | 6.594  | 6.606 | 6.94   | 7.61   | 6.8    | 8.531  | 8.409  | 8.438  |
| Pd P[4]-C1735 with 13A1 | 124 | 155 | MLKYGGRVWTFHGETPRATDSSNTADLNNIS   | 7.41 | 4 | 29 | 5.878  | 6.219 | 6.102 | 7.108 | 7.28  | 7.356  | 8.111  | 7.746  | 8.122  | 8.824  | 8.69   | 8.762 | 9.033  | 9.477  | 8.925  | 11.211 | 11.204 | 10.461 |
| Pd P[4]-C1735 with 13A1 | 125 | 134 | LKYGGRVWTF                        | 8.83 | 3 | 8  | 1.302  | 1.513 | 1.391 | 1.172 | 1.49  | 1.444  | 1.285  | 1.313  | 1.384  | 1.355  | 1.417  | 1.459 | 1.485  | 1.48   | 1.422  | 2.013  | 2.042  | 1.98   |
| Pd P[4]-C1735 with 13A1 | 125 | 151 | LKYGGRVWTFHGETPRATDSSNTADL        | 7.14 | 4 | 24 | 4.124  | 4.354 | 4.115 | 4.86  | 5.313 | 5.176  | 5.823  | 5.821  | 5.908  | 6.502  | 6.636  | 6.571 | 6.849  | 7.022  | 6.656  | 8.233  | 8.238  | 8.13   |
| Pd P[4]-C1735 with 13A1 | 125 | 153 | LKYGGRVWTFHGETPRATDSSNTADLNN      | 6.68 | 4 | 26 | 6.024  | 6.302 | 5.891 | 7.058 | 7.16  | 7.036  | 7.816  | 7.713  | 7.749  | 8.594  | 8.548  | 8.552 | 8.957  | 8.996  | 8.571  | 10.606 | 10.323 | 10.093 |
| Pd P[4]-C1735 with 13A1 | 125 | 155 | LKYGGRVWTFHGETPRATDSSNTADLNNIS    | 7.12 | 4 | 28 | 6.465  | 6.606 | 6.374 | 8.061 | 7.908 | 7.803  | 8.815  | 8.589  | 8.662  | 9.525  | 9.492  | 9.448 | 9.805  | 9.787  | 9.353  | 11.677 | 11.352 | 11.095 |
| Pd P[4]-C1735 with 13A1 | 126 | 155 | KYGGRRVWTFHGETPRATDSSNTADLNNIS    | 6.74 | 4 | 27 | 5.856  | 5.979 | 5.669 | 7.247 | 7.463 | 7.276  | 8.555  | 8.318  | 8.425  | 9.425  | 9.279  | 9.279 | 9.673  | 9.373  | 9.278  | 11.68  | 11.36  | 10.819 |
| Pd P[4]-C1735 with 13A1 | 135 | 151 | HGETPRATDSSNTADL                  | 4.1  | 3 | 14 | 2.942  | 3.041 | 2.881 | 3.994 | 4.165 | 4.062  | 5.02   | 4.984  | 5.064  | 5.786  | 5.771  | 5.748 | 6.15   | 6.222  | 6.043  | 7.262  | 7.168  | 7.091  |
| Pd P[4]-C1735 with 13A1 | 135 | 155 | HGETPRATDSSNTADLNNIS              | 4.76 | 3 | 18 | 5.012  | 5.256 | 5.028 | 6.568 | 6.431 | 6.309  | 7.576  | 7.528  | 7.541  | 8.395  | 8.247  | 8.428 | 8.512  | 8.617  | 8.384  | 9.825  | 9.593  | 9.367  |
| Pd P[4]-C1735 with 13A1 | 154 | 162 | ISIIHSEF                          | 8.38 | 2 | 7  | 0.138  | 0.151 | 0.16  | 0.22  | 0.223 | 0.215  | 0.414  | 0.393  | 0.411  | 0.734  | 0.736  | 0.738 | 1.047  | 1.046  | 1.016  | 1.689  | 1.712  | 1.73   |
| Pd P[4]-C1735 with 13A1 | 156 | 161 | IIHSE                             | 3.8  | 2 | 4  | 0.153  | 0.169 | 0.152 | 0.206 | 0.199 | 0.212  | 0.335  | 0.312  | 0.348  | 0.637  | 0.621  | 0.62  | 0.879  | 0.895  | 0.834  | 1.255  | 1.343  | 1.365  |
| Pd P[4]-C1735 with 13A1 | 156 | 162 | IIHSEF                            | 6.87 | 2 | 5  | 0.135  | 0.152 | 0.137 | 0.195 | 0.203 | 0.191  | 0.345  | 0.338  | 0.356  | 0.631  | 0.636  | 0.636 | 0.854  | 0.802  | 1.236  | 1.266  | 1.291  |        |
| Pd P[4]-C1735 with 13A1 | 157 | 162 | IIHSEF                            | 5.57 | 2 | 4  | 0.11   | 0.117 | 0.102 | 0.148 | 0.148 | 0.14   | 0.226  | 0.227  | 0.254  | 0.464  | 0.441  | 0.475 | 0.632  | 0.657  | 0.601  | 0.944  | 0.984  | 1.018  |
| Pd P[4]-C1735 with 13A1 | 162 | 175 | YIIPRSQESKSNE                     | 5.95 | 3 | 11 | 2.557  | 2.738 | 2.571 | 3.292 | 3.358 | 3.21   | 3.604  | 3.57   | 3.696  | 4.51   | 4.499  | 4.495 | 4.942  | 5.061  | 4.79   | 5.413  | 5.382  | 5.317  |
| Pd P[4]-C1735 with 13A1 | 163 | 170 | YIIPRSQESKSNE                     | 4.81 | 2 | 5  | 2.178  | 2.254 | 2.113 | 2.532 | 2.603 | 2.518  | 2.596  | 2.603  | 2.599  | 2.906  | 2.898  | 2.918 | 3.087  | 3.156  | 3.039  | 3.318  | 3.205  | 3.153  |
| Pd P[4]-C1735 with 13A1 | 163 | 175 | YIIPRSQESKSNE                     | 4.17 | 3 | 10 | 2.88   | 3.039 | 2.845 | 3.59  | 3.701 | 3.581  | 4.058  | 4.02   | 4.165  | 5.021  | 4.994  | 5.004 | 5.446  | 5.556  | 5.291  | 5.917  | 5.867  | 5.792  |
| Pd P[4]-C1735 with 13A1 | 163 | 181 | YIIPRSQESKSNEYINNL                | 6.78 | 3 | 16 | 2.91   | 3.369 | 2.982 | 3.896 | 4.051 | 3.896  | 4.495  | 4.123  | 4.769  | 6.211  | 6.462  | 6.203 | 6.554  | 7.195  | 6.487  | 7.604  | 7.44   | 8.029  |
| Pd P[4]-C1735 with 13A1 | 164 | 175 | IIPRSQESKSNE                      | 2.74 | 2 | 9  | 6.95   | 7.555 | 6.651 | 7.64  | 7.462 | 7.43   | 7.404  | 7.329  | 7.546  | 7.762  | 7.774  | 7.653 | 7.533  | 7.522  | 7.5    | 5.597  | 5.703  | 5.455  |
| Pd P[4]-C1735 with 13A1 | 176 | 181 | YINNL                             | 5.3  | 2 | 4  | 0.124  | 0.22  | 0.172 | 0.259 | 0.261 | 0.194  | 0.387  | 0.388  | 0.363  | 0.762  | 0.744  | 0.733 | 0.931  | 0.971  | 0.961  | 1.239  | 1.269  | 1.281  |

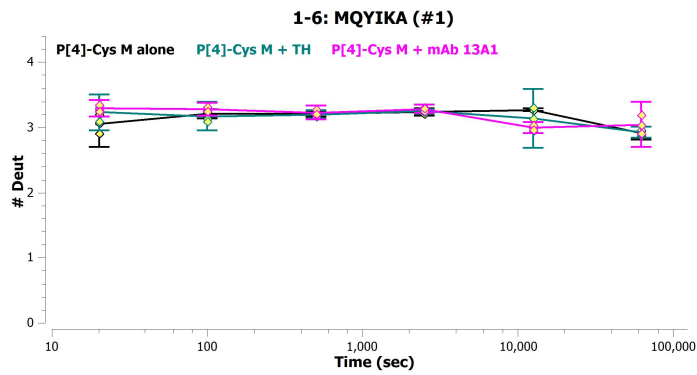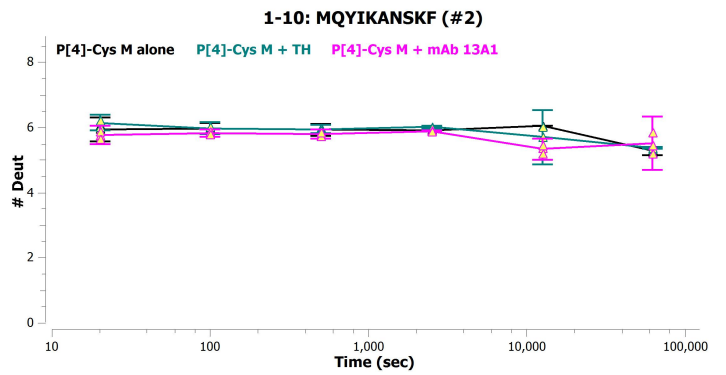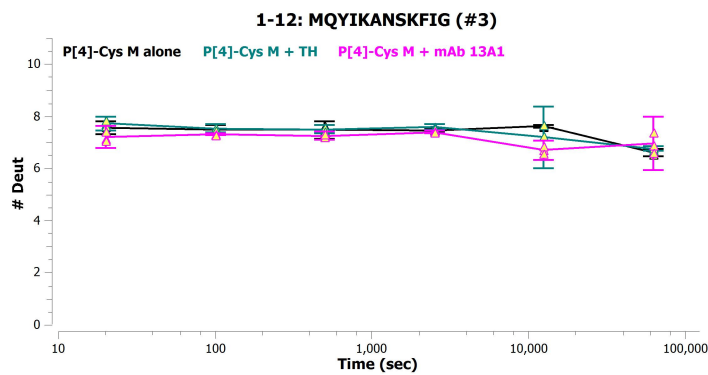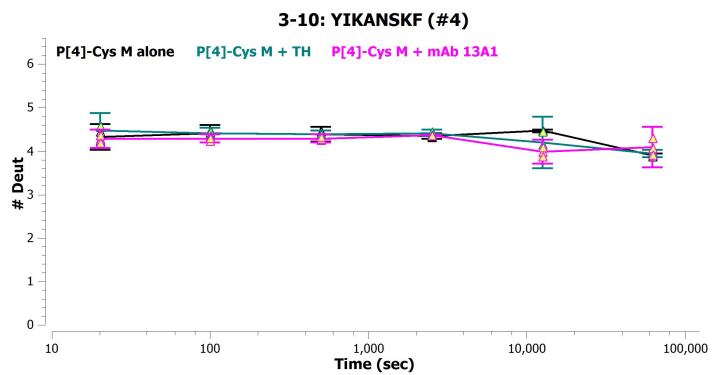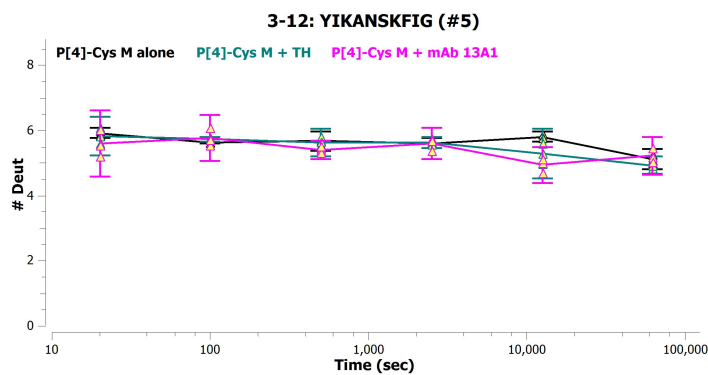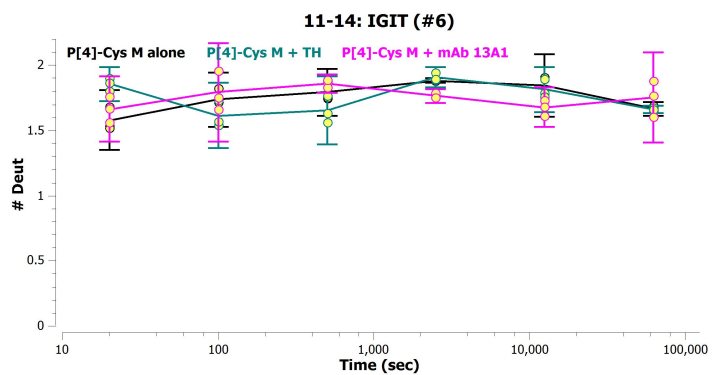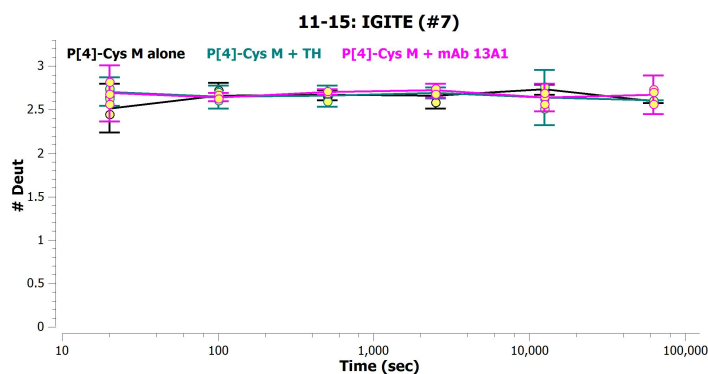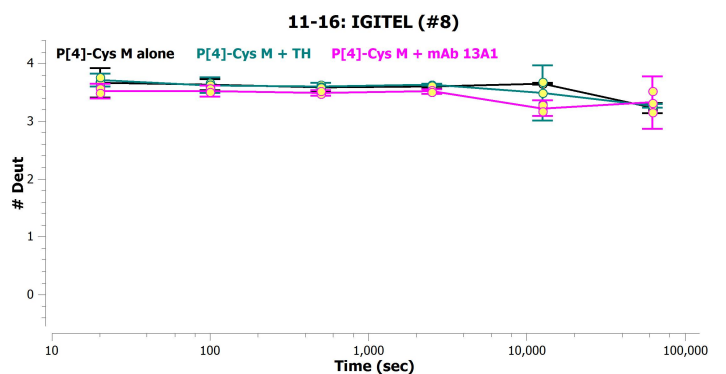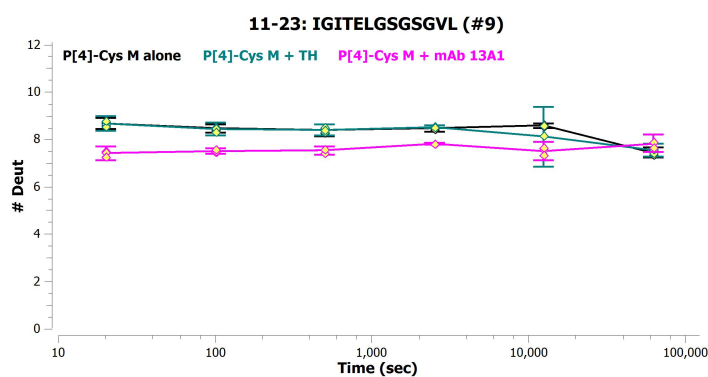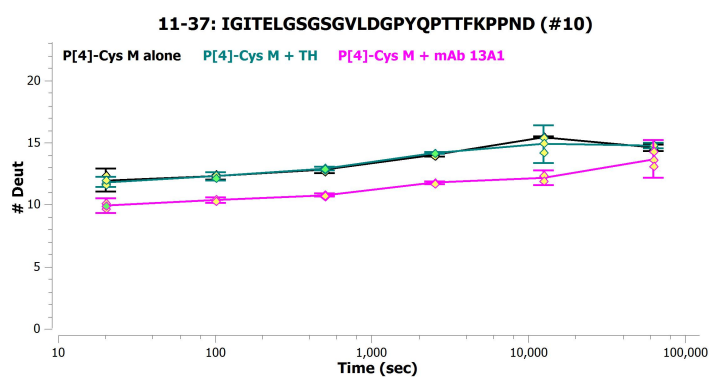

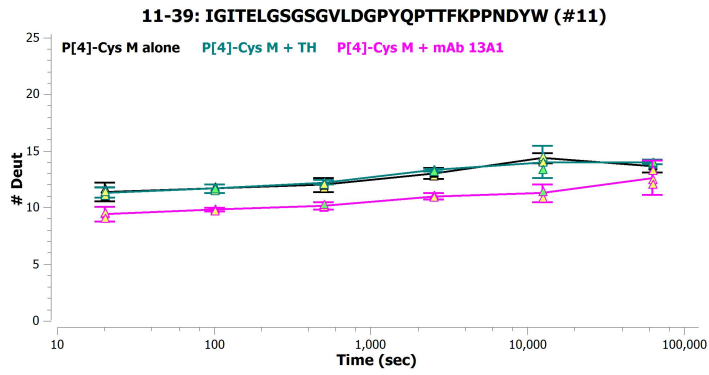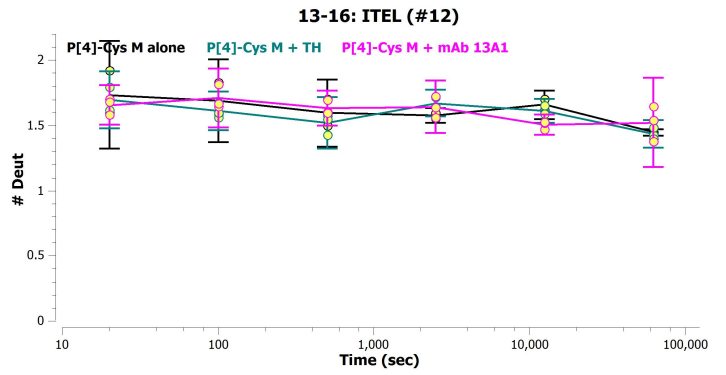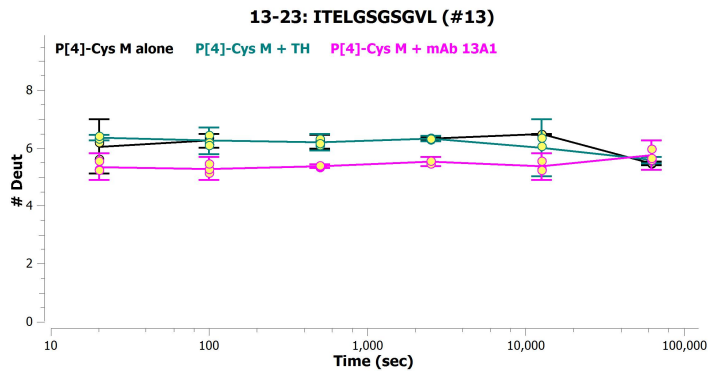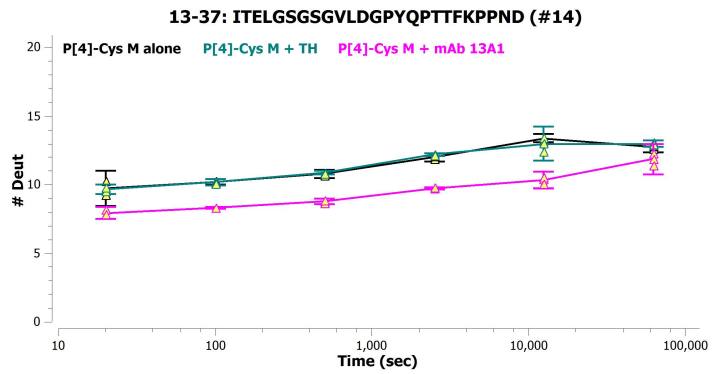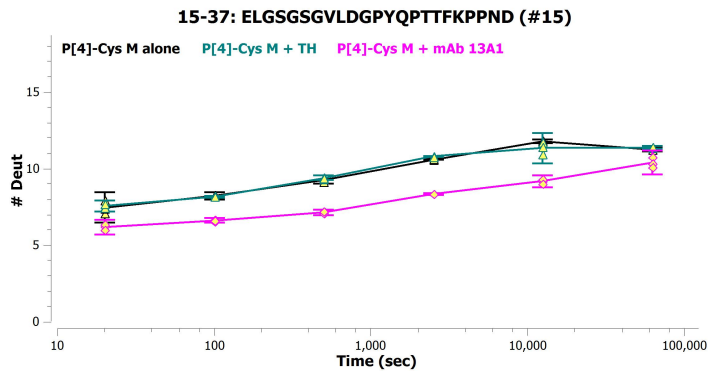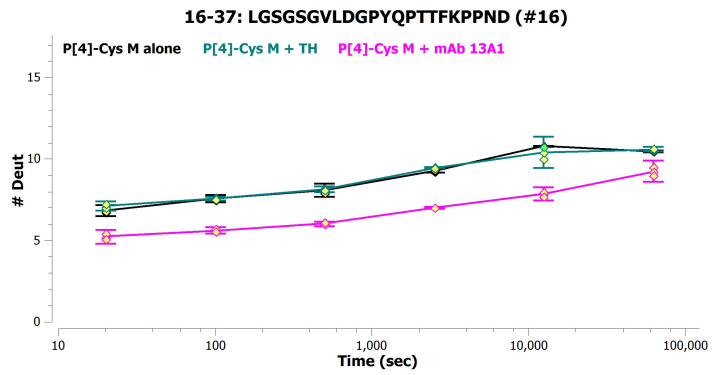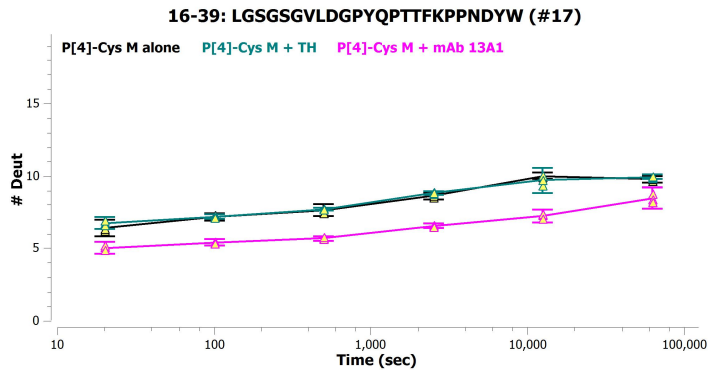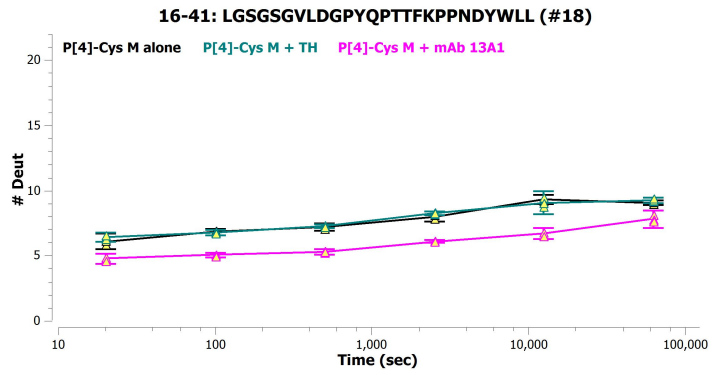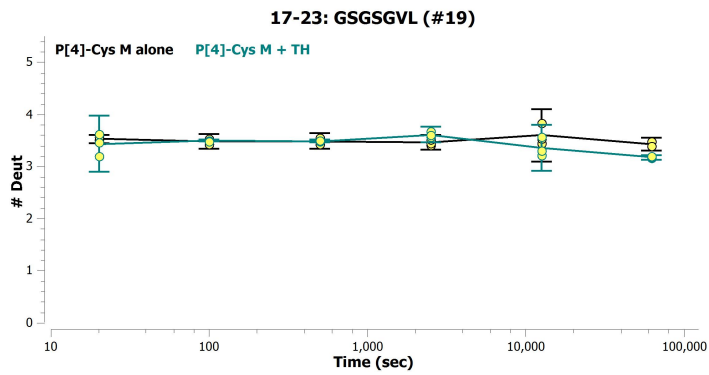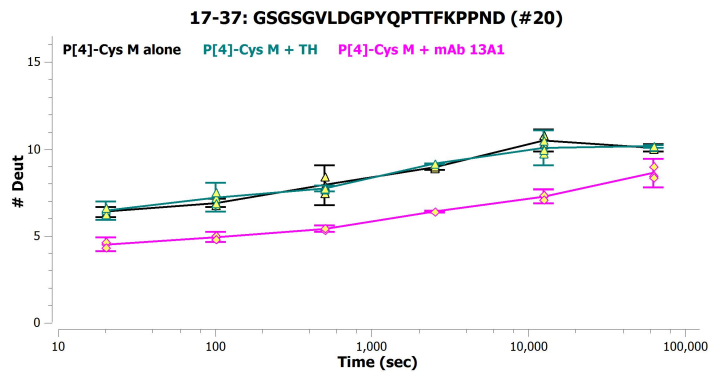



17-39: GSGSGVLDGPYQPTTFKPPNDYW (#21)

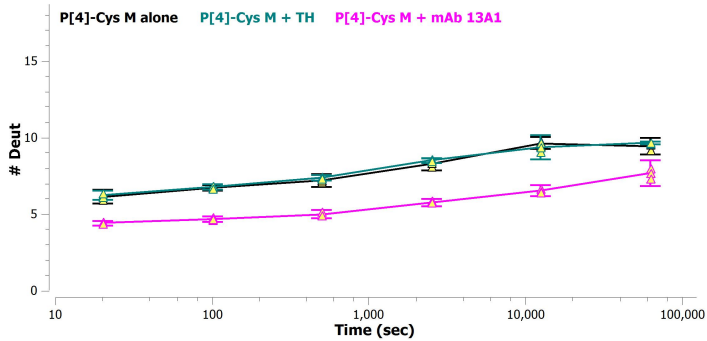

24-37: DGPYQPTTFKPPND (#22)

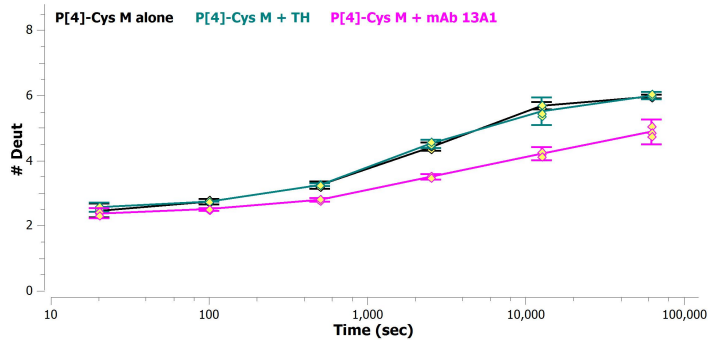

24-39: DGPYQPTTFKPPNDYW (#23)

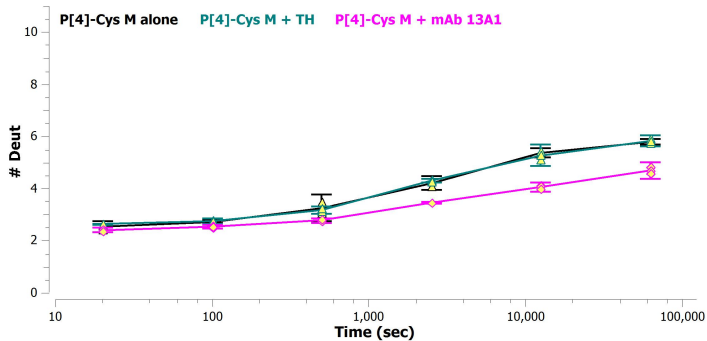

24-41: DGPYQPTTFKPPNDYWLL (#24)

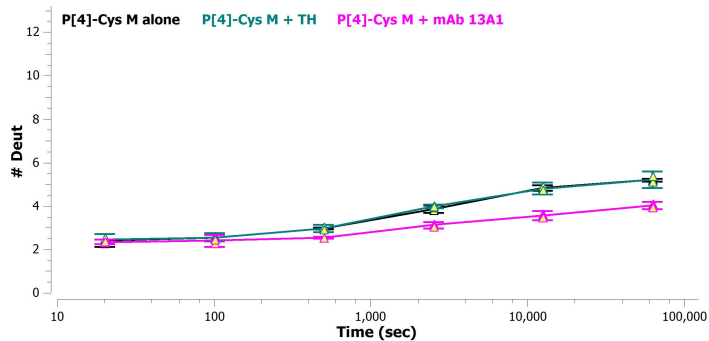

38-41: YWLL (#25)

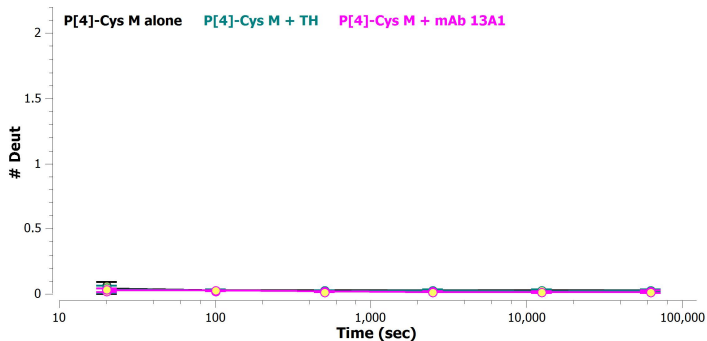

40-51: LLISSNTNGVVY (#26)

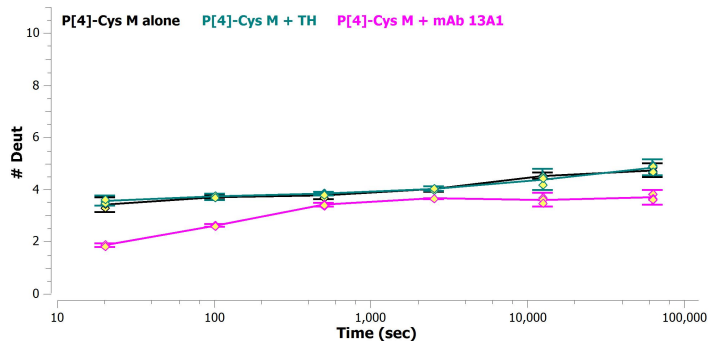

40-59: LLISSNTNGVVYESTNNDF (#27)

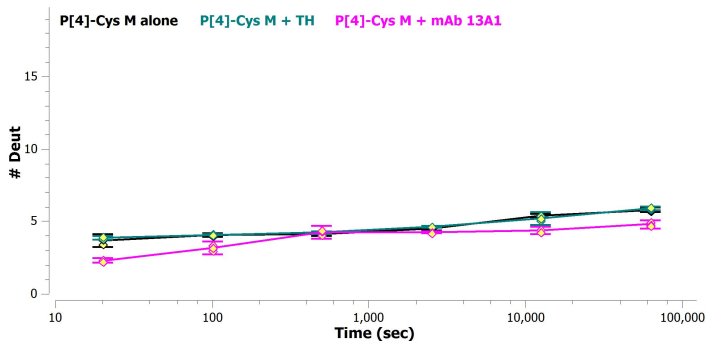

41-51: LISSNTNGVVY (#28)

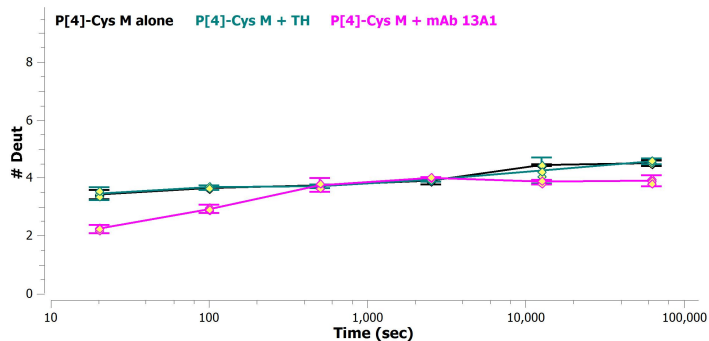

42-51: ISSNTNGVVY (#29)

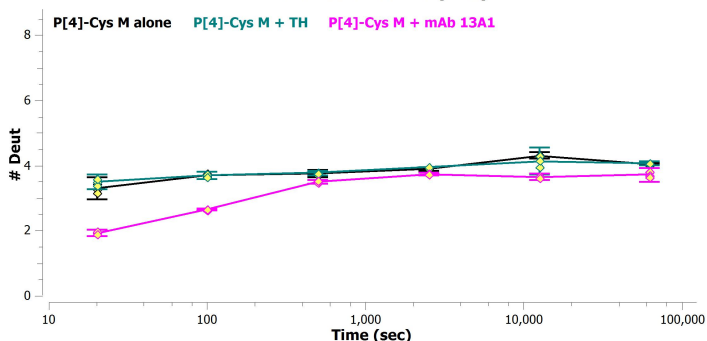

42-59: ISSNTNGVVYESTNNDF (#30)

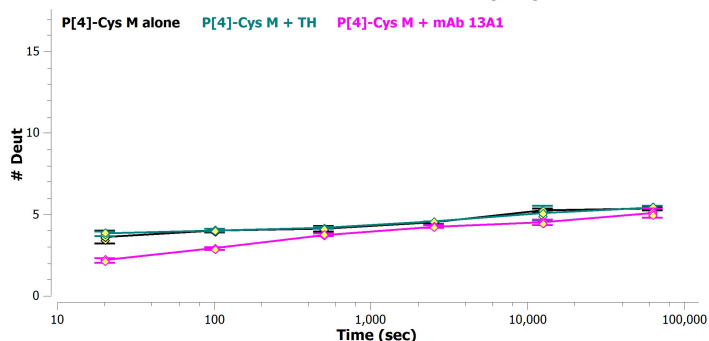

**59-63: FWTAV (#31)**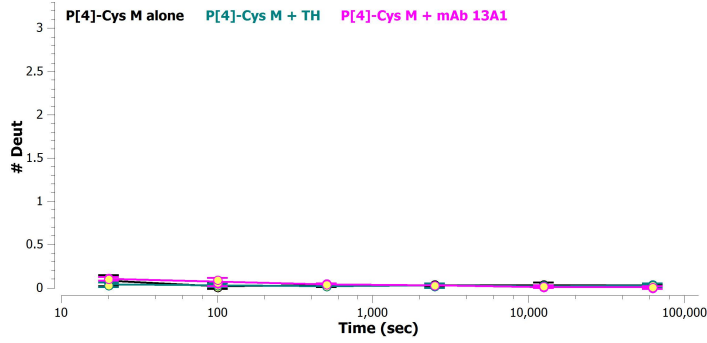**59-64: FWTAVI (#32)**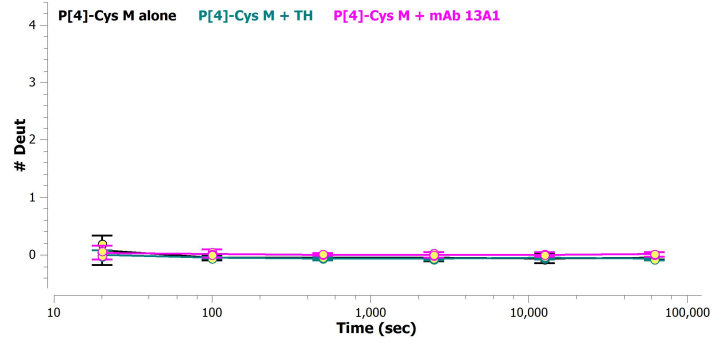**60-63: WTAV (#33)**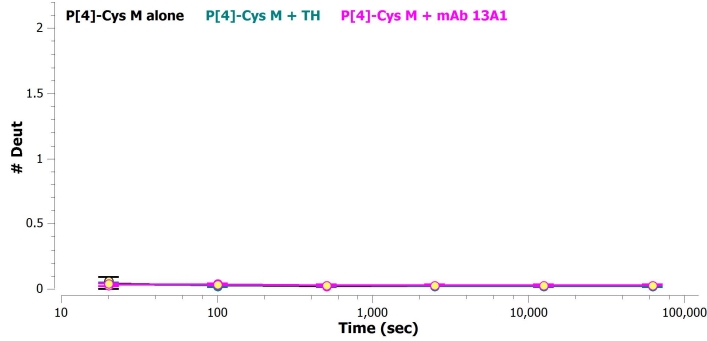**60-64: WTAVI (#34)**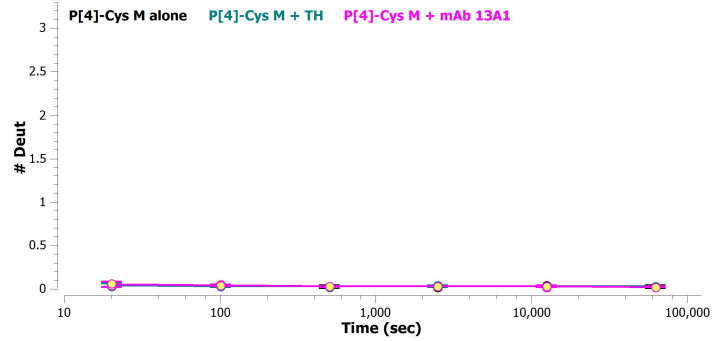**64-73: IAVEPHVSQT (#35)**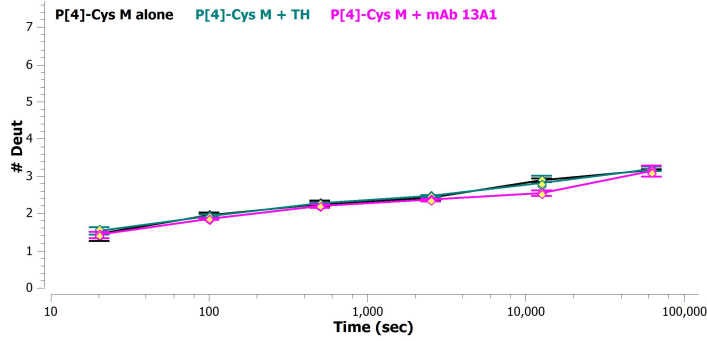**64-76: IAVEPHVSQTNRQ (#36)**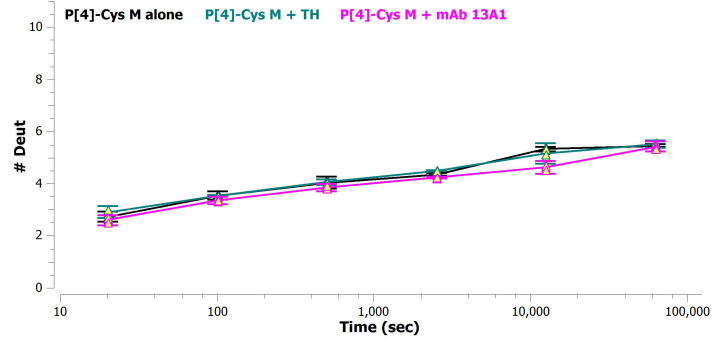**64-79: IAVEPHVSQTNRQYIL (#37)**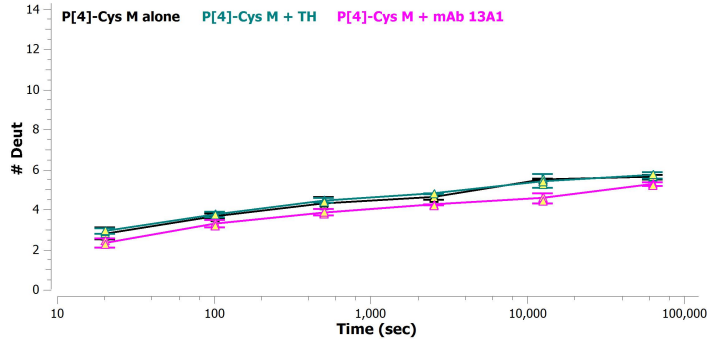**65-73: AVEPHVSQT (#38)**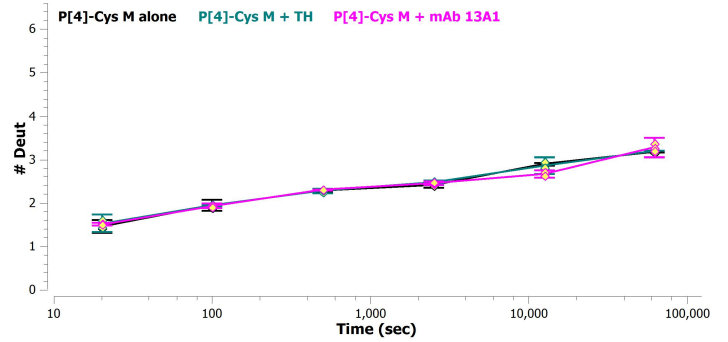**65-76: AVEPHVSQTNRQ (#39)**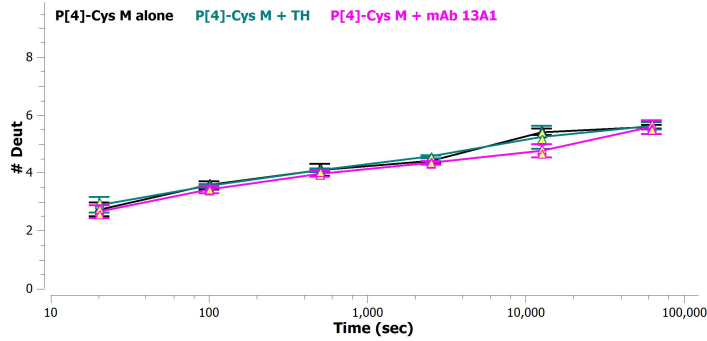**65-79: AVEPHVSQTNRQYIL (#40)**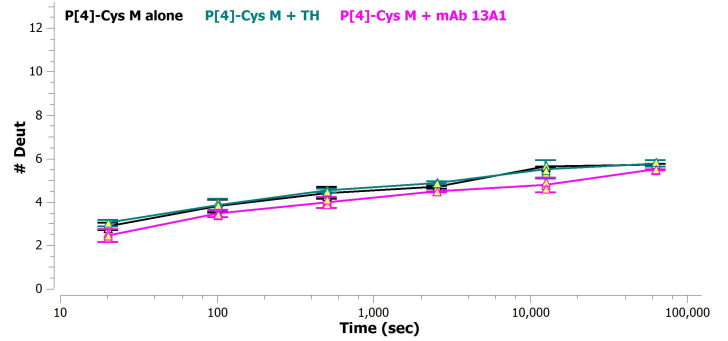

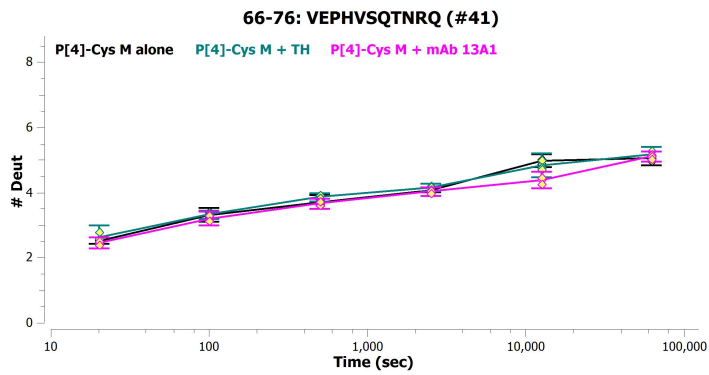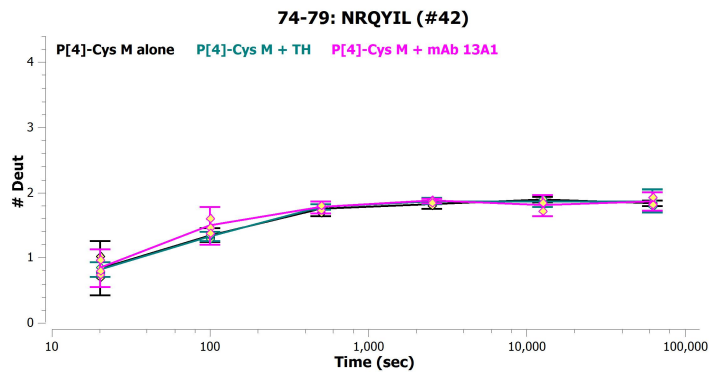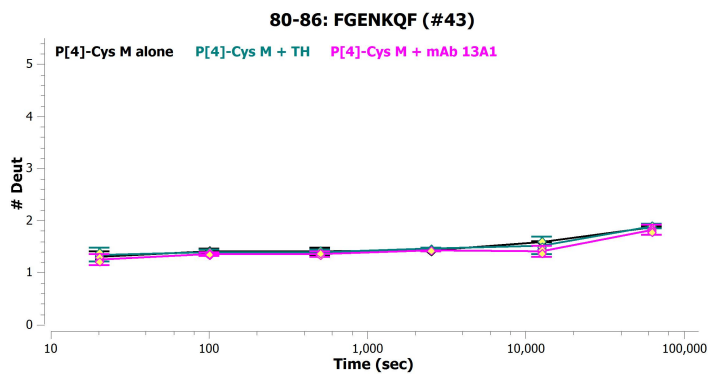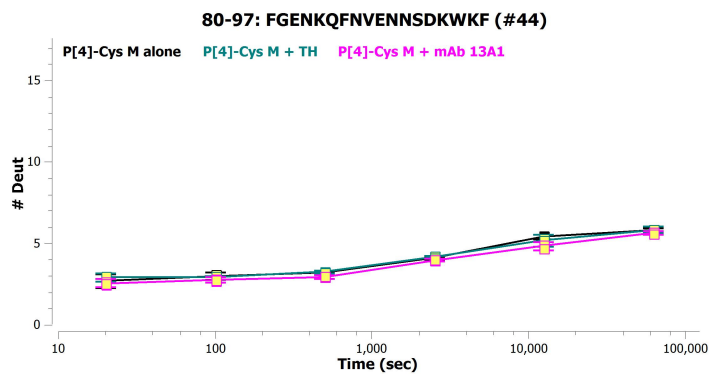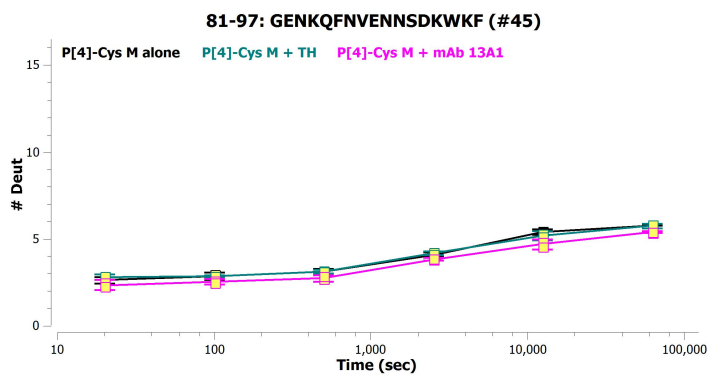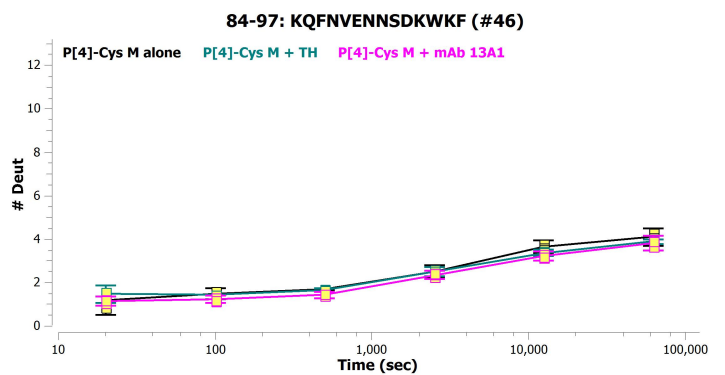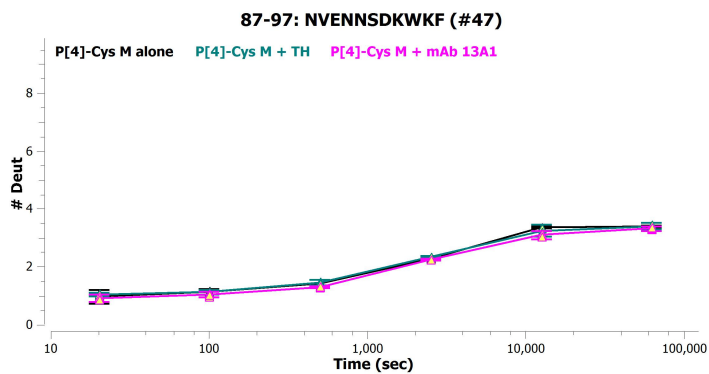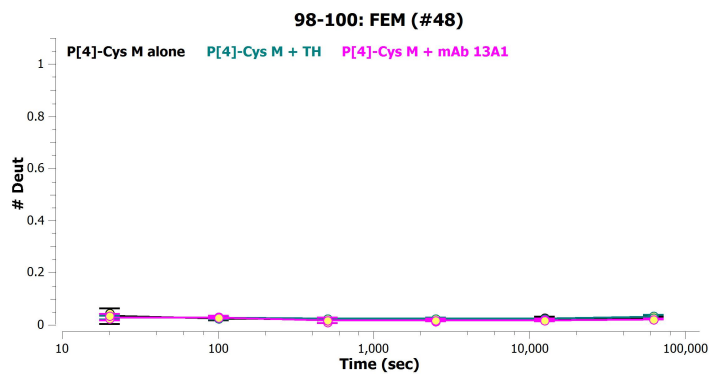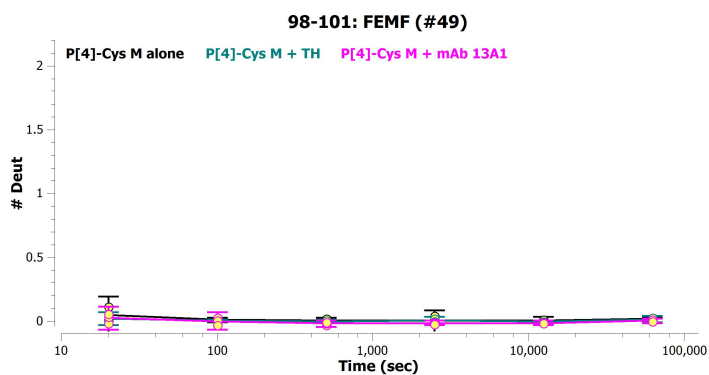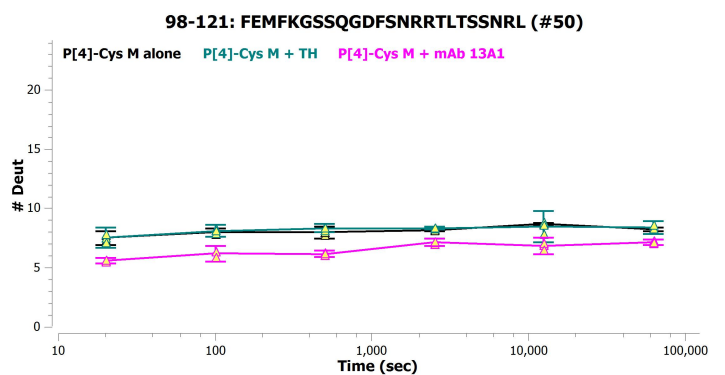

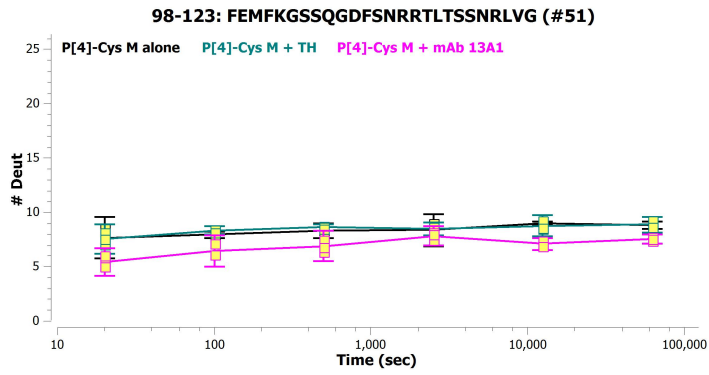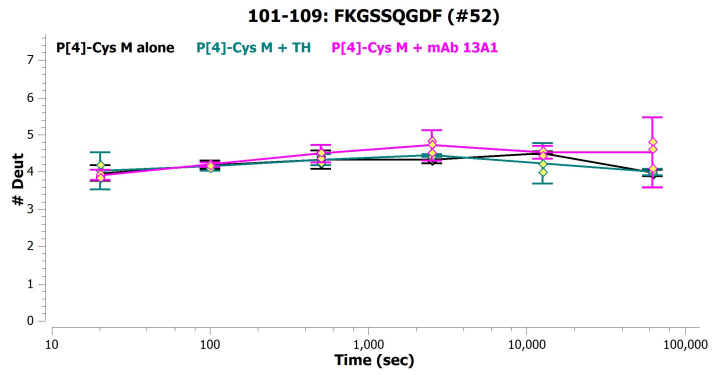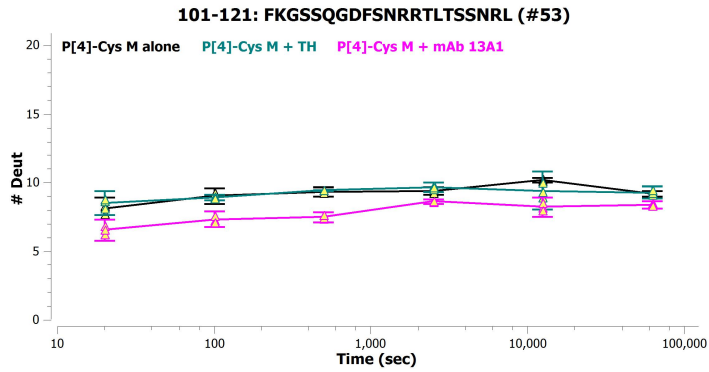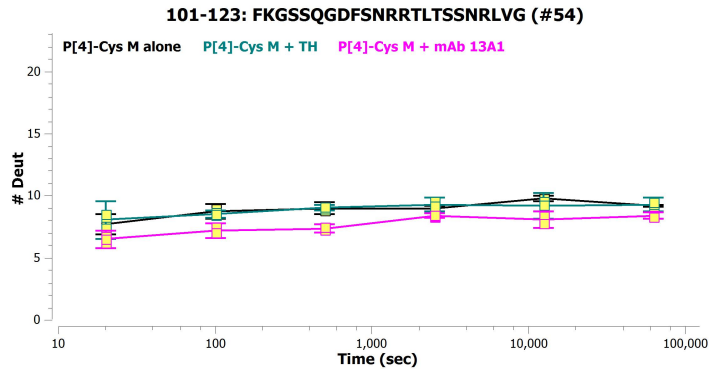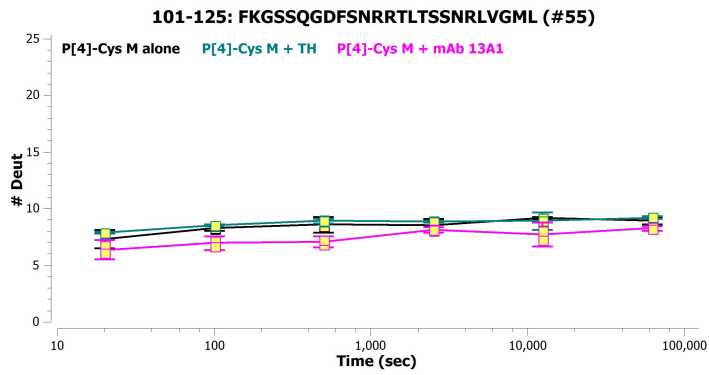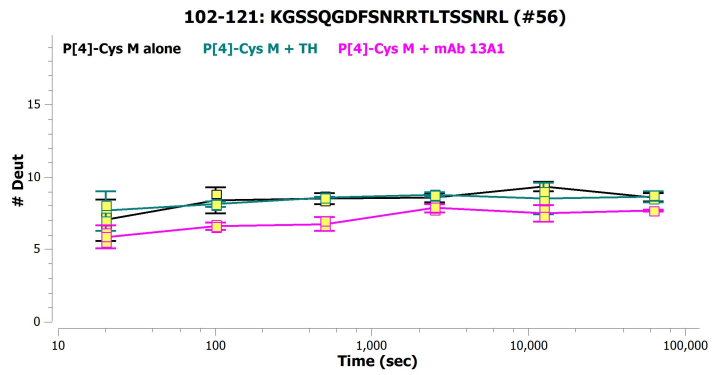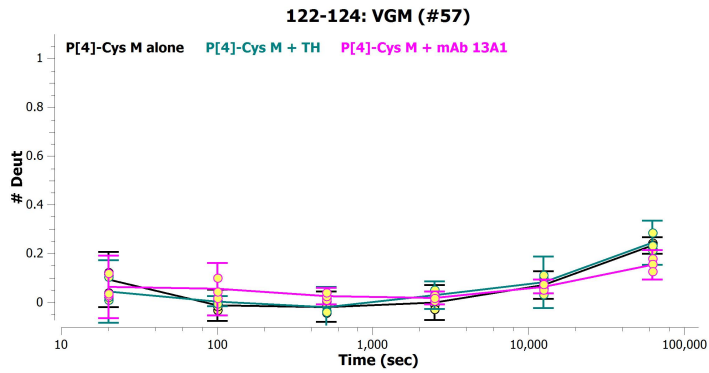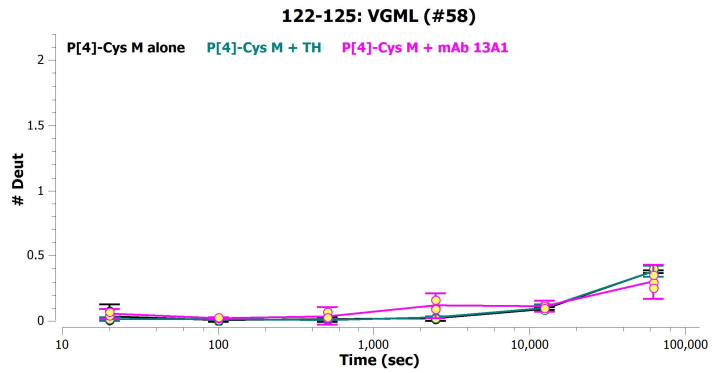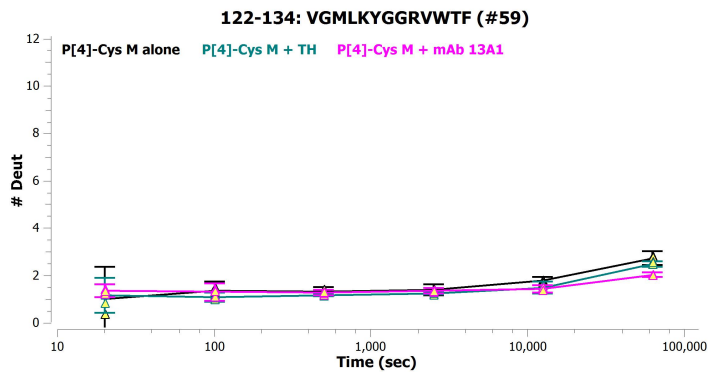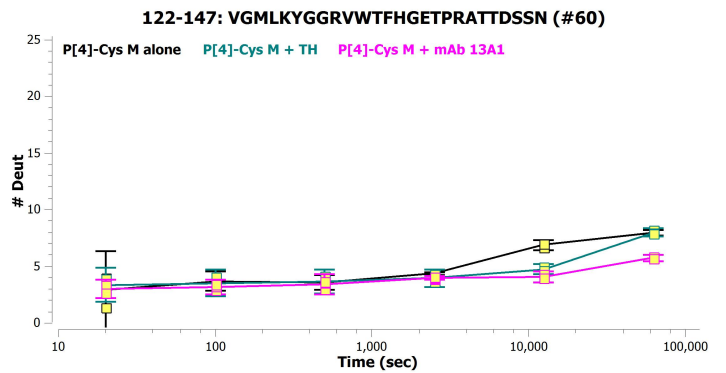



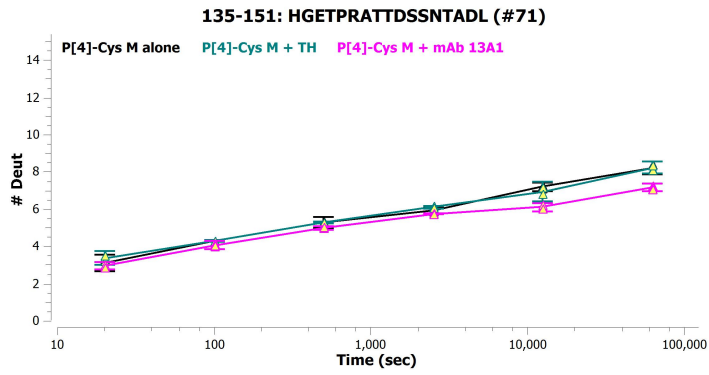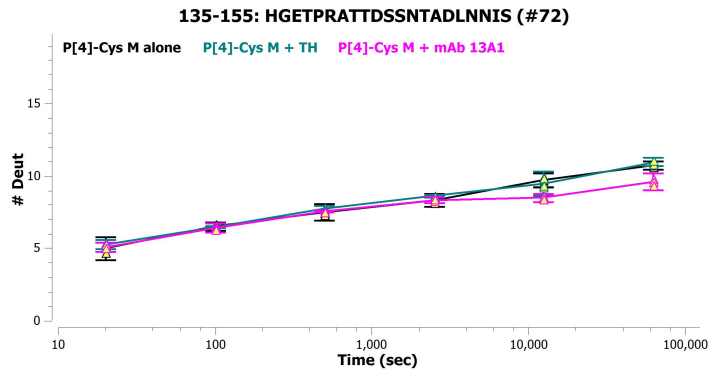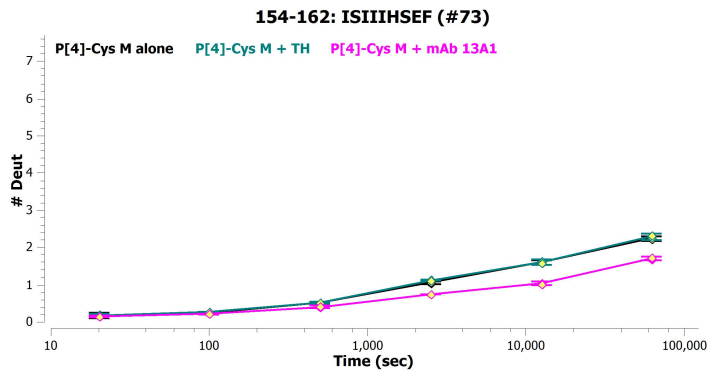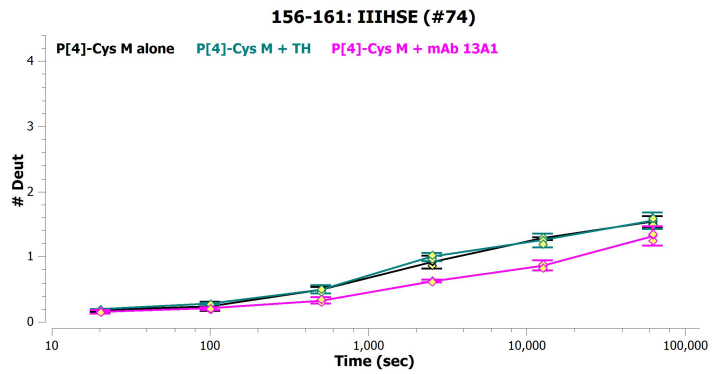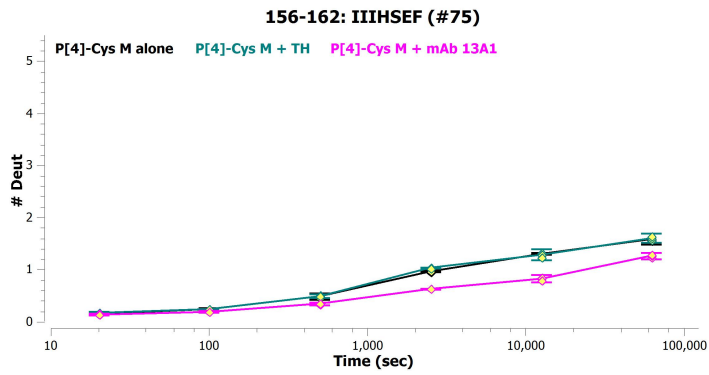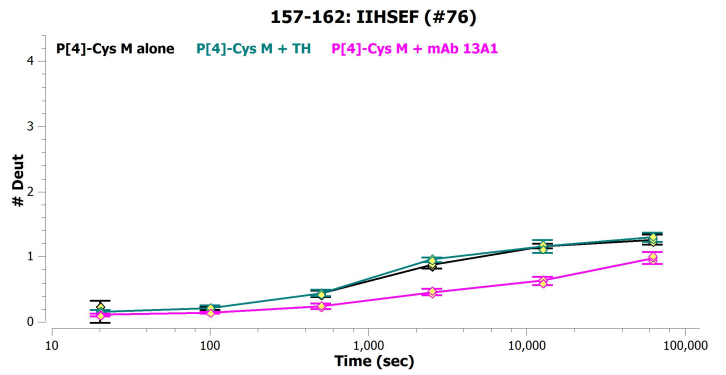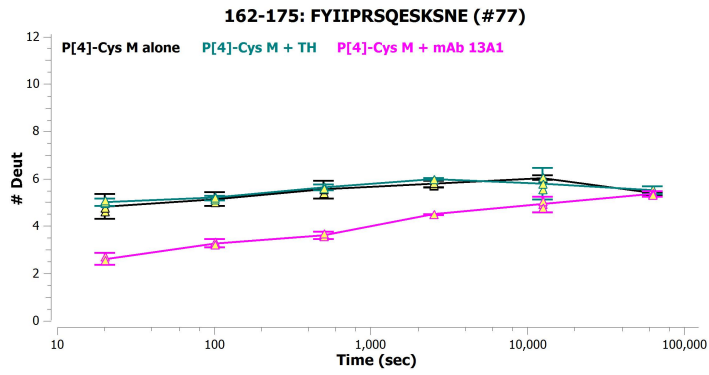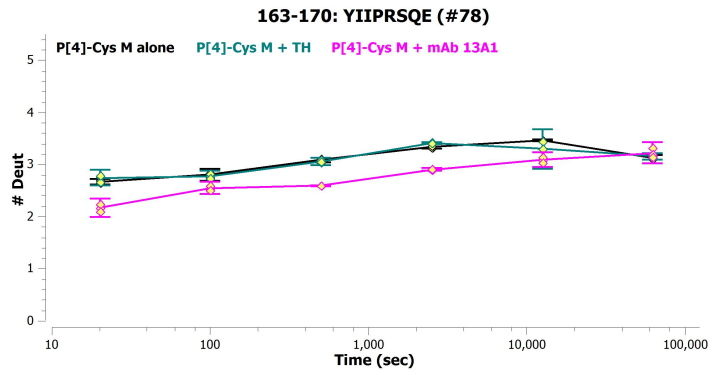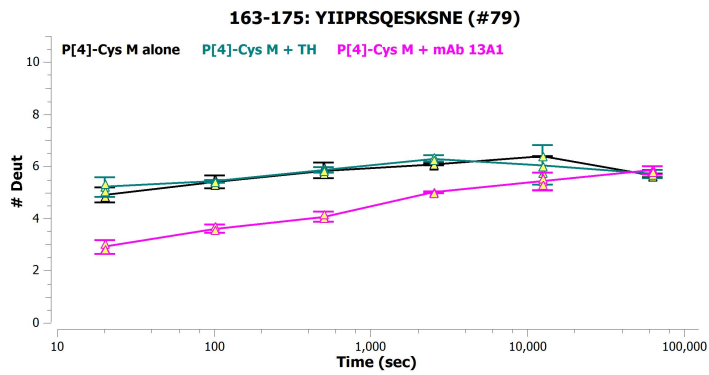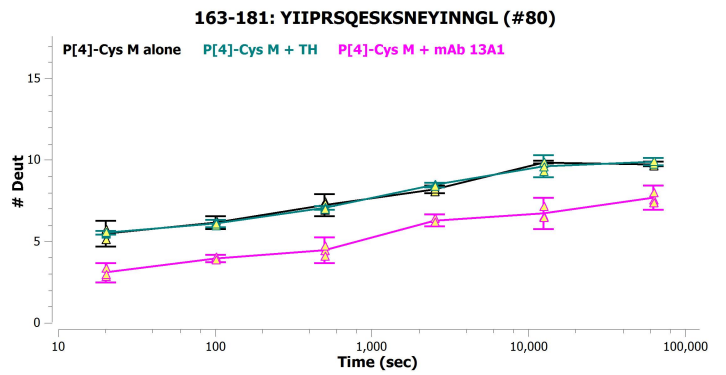

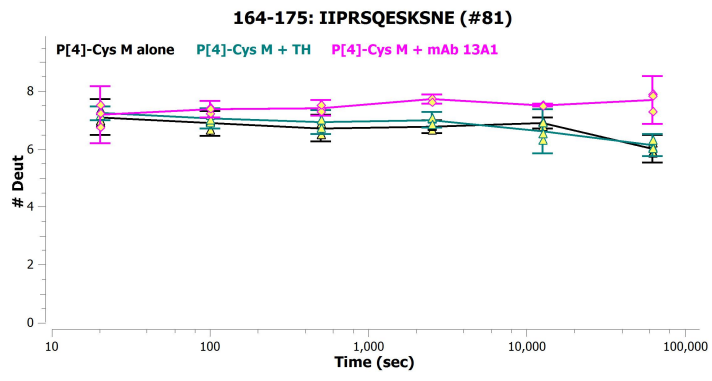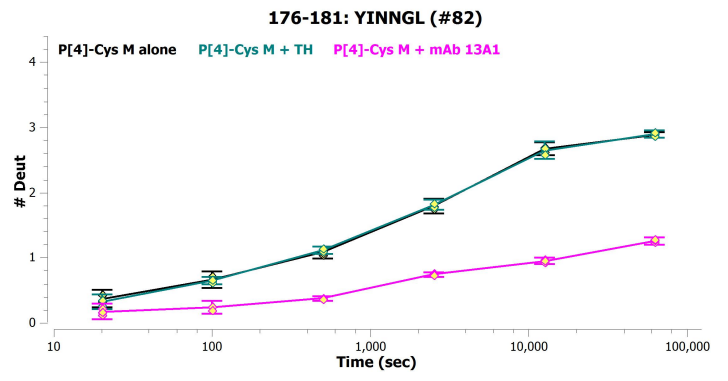

Supplement: mmc2.pdf [file mmc2.pdf]
